# Supplementary material
Source: publisher figshare collection journal article supplement (https://geolsoc.figshare.com/articles/dataset/_/3454952)

**Appendix E:** Diagrams illustrating the major-element composition of (a,b) phengite and (b,c) biotite in the studied samples. The composition of phengite varies along the celadonite substitution vector ( $X_{+1}Al_2Si_{+1}$ ). The Mg# and the content of tetrahedrally-coordinated Al ( $Al^{IV}$ ) vary independently. Superscripts denote: \*less paramagnetic magnetic fraction, †paramagnetic fraction, ‡brown biotite, §green biotite.

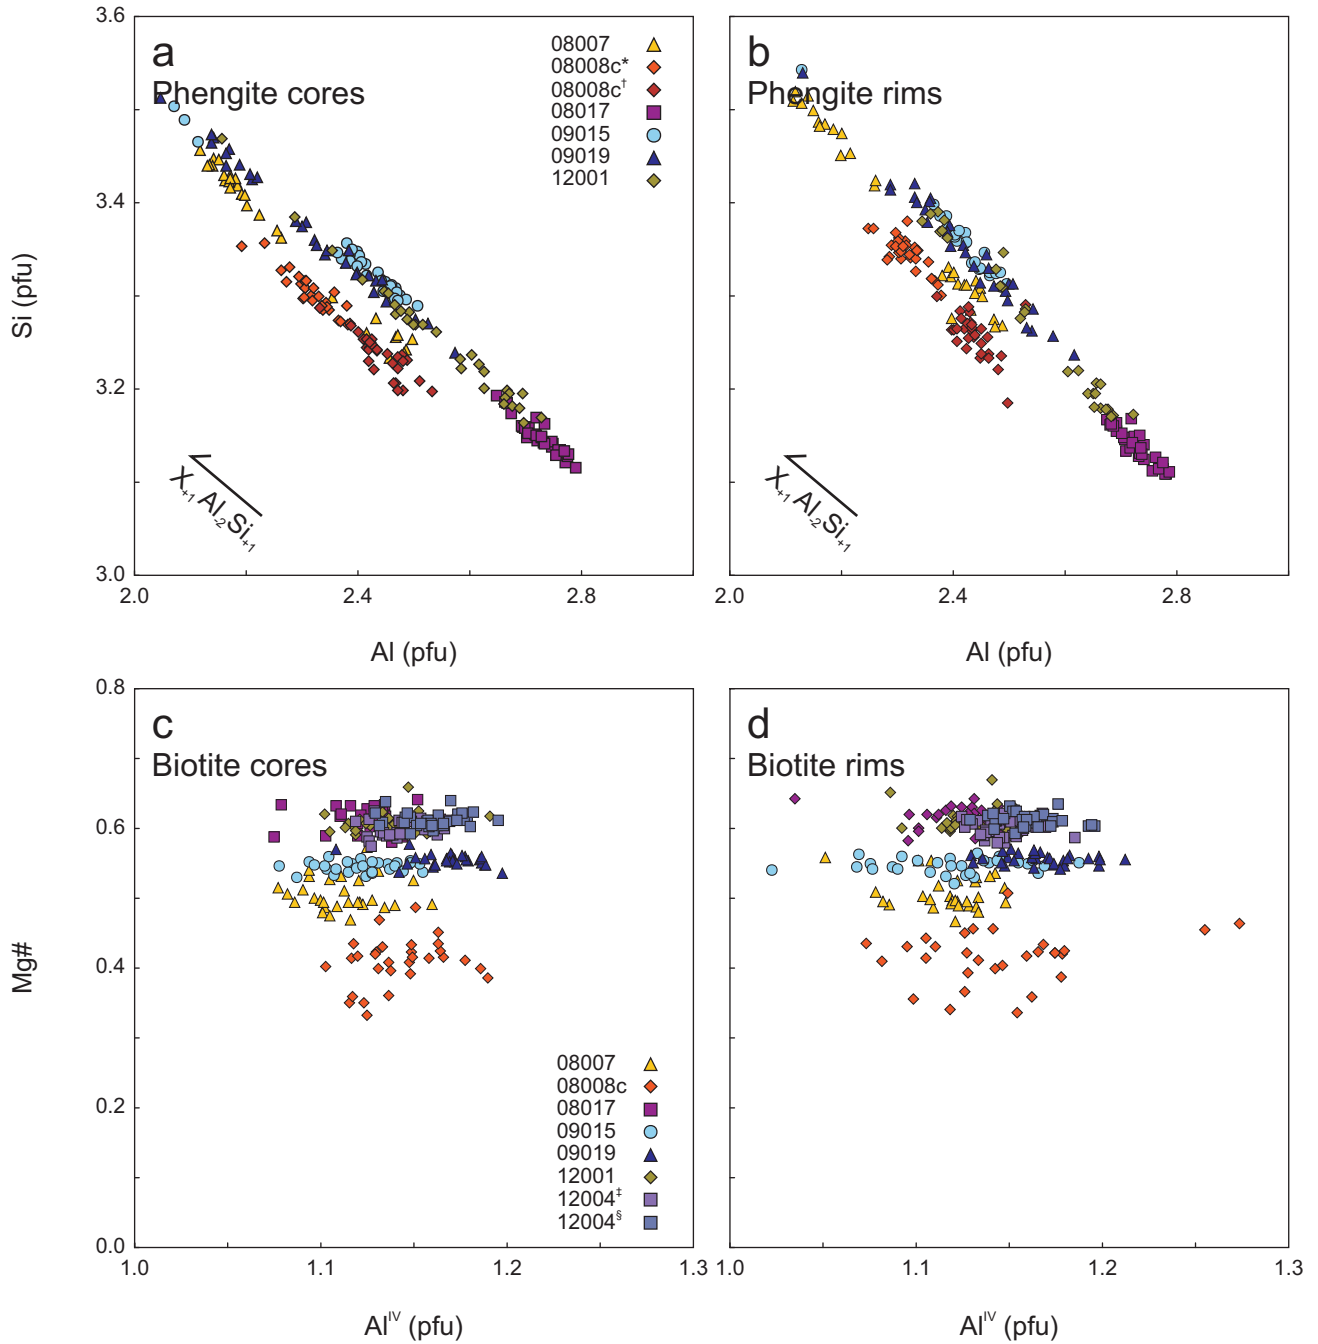

Supplement: Supplementary file 1 [file 1]
