# Supplementary material
Source: publisher figshare collection journal article supplement (https://geolsoc.figshare.com/articles/dataset/_/3454952)
Supplement: Supplementary file 2 [file 1]

**Appendix B:** U-Pb isotope data and –ages from the LA-ICP-MS analysis of zircon (sample 08020).

| Analysis                         | Spot size<br>[μm] | U*<br>[ppm] | Color† | Ratios‡                             |         | <sup>207</sup> Pb/ <sup>235</sup> U |         | <sup>207</sup> Pb/ <sup>206</sup> Pb |         | ρ <sup>§</sup> | Ages [Ma] ¶                         |         | <sup>207</sup> Pb/ <sup>235</sup> U |         | <sup>207</sup> Pb/ <sup>206</sup> Pb |         | f <sup>206</sup> % <sup>1</sup> | Concordance <sup>2</sup> |  |
|----------------------------------|-------------------|-------------|--------|-------------------------------------|---------|-------------------------------------|---------|--------------------------------------|---------|----------------|-------------------------------------|---------|-------------------------------------|---------|--------------------------------------|---------|---------------------------------|--------------------------|--|
|                                  |                   |             |        | <sup>206</sup> Pb/ <sup>238</sup> U | ±2 s.d. |                                     | ±2 s.d. |                                      | ±2 s.d. |                | <sup>206</sup> Pb/ <sup>238</sup> U | ±2 s.d. |                                     | ±2 s.d. |                                      | ±2 s.d. |                                 |                          |  |
| <i>Size fraction: &gt;400 μm</i> |                   |             |        |                                     |         |                                     |         |                                      |         |                |                                     |         |                                     |         |                                      |         |                                 |                          |  |
| 01                               | 35                | 42          | b-0    | 0.1542                              | 0.0031  | 1.475                               | 0.053   | 0.0694                               | 0.0021  | 0.55           | 924                                 | 17      | 920                                 | 22      | 911                                  | 62      | 0.51                            | 101.5                    |  |
| 02                               | 35                | 180         | b-0    | 0.1571                              | 0.0030  | 1.498                               | 0.040   | 0.0692                               | 0.0013  | 0.70           | 941                                 | 17      | 930                                 | 16      | 904                                  | 39      | 0.00                            | 104.1                    |  |
| 03a                              | 35                | 136         | b-0    | 0.1195                              | 0.0043  | 1.139                               | 0.050   | 0.0692                               | 0.0017  | 0.82           | 728                                 | 25      | 772                                 | 24      | 903                                  | 52      | 0.30                            | 80.6                     |  |
| 03b                              | 35                | 58          | b-0    | 0.1517                              | 0.0040  | 1.443                               | 0.062   | 0.0690                               | 0.0023  | 0.62           | 910                                 | 23      | 907                                 | 26      | 899                                  | 69      | 2.67                            | 101.3                    |  |
| 03c                              | 35                | 54          | b-0    | 0.1109                              | 0.0028  | 0.963                               | 0.037   | 0.0630                               | 0.0019  | 0.64           | 678                                 | 16      | 685                                 | 19      | 708                                  | 63      | 0.63                            | 95.8                     |  |
| 04                               | 35                | 57          | b-0    | 0.1138                              | 0.0030  | 1.179                               | 0.050   | 0.0752                               | 0.0025  | 0.63           | 695                                 | 17      | 791                                 | 23      | 1073                                 | 66      | 0.08                            | 64.8                     |  |
| 05a                              | 35                | 158         | b-0    | 0.1521                              | 0.0053  | 1.455                               | 0.068   | 0.0694                               | 0.0022  | 0.75           | 913                                 | 30      | 912                                 | 28      | 910                                  | 64      | 0.06                            | 100.3                    |  |
| 05b                              | 35                | 38          | b-0    | 0.1520                              | 0.0046  | 1.466                               | 0.069   | 0.0700                               | 0.0025  | 0.65           | 912                                 | 26      | 917                                 | 28      | 927                                  | 73      | 0.31                            | 98.4                     |  |
| 06                               | 35                | 55          | b-0    | 0.1612                              | 0.0046  | 1.582                               | 0.070   | 0.0712                               | 0.0024  | 0.65           | 964                                 | 25      | 963                                 | 27      | 963                                  | 69      | 0.00                            | 100.1                    |  |
| 07                               | 35                | 65          | b-0    | 0.1502                              | 0.0053  | 1.440                               | 0.080   | 0.0695                               | 0.0030  | 0.63           | 902                                 | 30      | 906                                 | 33      | 915                                  | 89      | 0.02                            | 98.6                     |  |
| 08a                              | 35                | 174         | b-0    | 0.1100                              | 0.0029  | 1.043                               | 0.040   | 0.0688                               | 0.0019  | 0.69           | 673                                 | 17      | 725                                 | 20      | 892                                  | 58      | 0.06                            | 75.5                     |  |
| 08b                              | 35                | 205         | b-0    | 0.1534                              | 0.0044  | 1.472                               | 0.058   | 0.0696                               | 0.0019  | 0.73           | 920                                 | 25      | 919                                 | 24      | 916                                  | 56      | 0.02                            | 100.5                    |  |
| 08c                              | 35                | 69          | b-0    | 0.1530                              | 0.0045  | 1.487                               | 0.066   | 0.0705                               | 0.0023  | 0.66           | 918                                 | 25      | 925                                 | 27      | 943                                  | 68      | 0.00                            | 97.3                     |  |
| 09                               | 35                | 55          | b-0    | 0.1548                              | 0.0054  | 1.495                               | 0.067   | 0.0701                               | 0.0020  | 0.78           | 928                                 | 30      | 929                                 | 27      | 931                                  | 57      | 0.00                            | 99.6                     |  |
| 10                               | 35                | 65          | b-0    | 0.1521                              | 0.0040  | 1.461                               | 0.049   | 0.0697                               | 0.0014  | 0.80           | 912                                 | 23      | 914                                 | 20      | 919                                  | 41      | 0.00                            | 99.3                     |  |
| 11                               | 35                | 173         | b-0    | 0.1523                              | 0.0043  | 1.454                               | 0.050   | 0.0692                               | 0.0014  | 0.82           | 914                                 | 24      | 912                                 | 21      | 906                                  | 41      | 0.08                            | 100.9                    |  |
| 12                               | 35                | 48          | b-0    | 0.1552                              | 0.0046  | 1.514                               | 0.057   | 0.0708                               | 0.0016  | 0.79           | 930                                 | 26      | 936                                 | 23      | 951                                  | 47      | 0.00                            | 97.7                     |  |
| 13                               | 35                | 82          | b-0    | 0.1550                              | 0.0045  | 1.502                               | 0.055   | 0.0703                               | 0.0016  | 0.80           | 929                                 | 25      | 931                                 | 22      | 938                                  | 45      | 0.11                            | 99.0                     |  |
| 14                               | 35                | 51          | b-0    | 0.1259                              | 0.0026  | 1.203                               | 0.036   | 0.0693                               | 0.0015  | 0.68           | 764                                 | 15      | 802                                 | 17      | 908                                  | 45      | 0.12                            | 84.1                     |  |
| 15                               | 35                | 293         | b-0    | 0.1506                              | 0.0044  | 1.433                               | 0.050   | 0.0690                               | 0.0013  | 0.84           | 905                                 | 25      | 903                                 | 21      | 899                                  | 38      | 0.08                            | 100.6                    |  |
| <i>Size fraction: 300-400 μm</i> |                   |             |        |                                     |         |                                     |         |                                      |         |                |                                     |         |                                     |         |                                      |         |                                 |                          |  |
| 16                               | 35                | 43          | y,t-0  | 0.1653                              | 0.0029  | 1.671                               | 0.050   | 0.0733                               | 0.0018  | 0.59           | 986                                 | 16      | 998                                 | 19      | 1023                                 | 49      | 0.35                            | 96.4                     |  |
| 17                               | 35                | 232         | y,t-0  | 0.1561                              | 0.0058  | 1.492                               | 0.067   | 0.0693                               | 0.0017  | 0.84           | 935                                 | 33      | 927                                 | 27      | 908                                  | 50      | 0.28                            | 103.0                    |  |
| 18                               | 35                | 65          | y,t-0  | 0.1526                              | 0.0045  | 1.440                               | 0.058   | 0.0685                               | 0.0018  | 0.74           | 915                                 | 25      | 906                                 | 24      | 883                                  | 56      | 0.62                            | 103.7                    |  |
| 19                               | 35                | 367         | y,t-0  | 0.1582                              | 0.0045  | 1.535                               | 0.055   | 0.0704                               | 0.0016  | 0.79           | 947                                 | 25      | 945                                 | 22      | 940                                  | 46      | 0.05                            | 100.7                    |  |
| 20                               | 35                | 227         | y,t-0  | 0.1540                              | 0.0025  | 1.483                               | 0.039   | 0.0698                               | 0.0015  | 0.61           | 924                                 | 14      | 924                                 | 16      | 924                                  | 43      | 0.09                            | 100.0                    |  |
| 21                               | 35                | 93          | y,t-0  | 0.1565                              | 0.0053  | 1.523                               | 0.068   | 0.0706                               | 0.0021  | 0.75           | 938                                 | 29      | 940                                 | 27      | 945                                  | 60      | 0.00                            | 99.3                     |  |
| 22                               | 35                | 42          | y,t-0  | 0.1130                              | 0.0035  | 1.113                               | 0.046   | 0.0715                               | 0.0019  | 0.75           | 690                                 | 20      | 760                                 | 22      | 971                                  | 55      | 0.00                            | 71.1                     |  |
| 23a                              | 35                | 91          | y,t-0  | 0.1522                              | 0.0049  | 1.499                               | 0.066   | 0.0714                               | 0.0022  | 0.73           | 913                                 | 27      | 930                                 | 27      | 970                                  | 62      | 0.04                            | 94.2                     |  |
| 23b                              | 35                | 56          | y,t-0  | 0.1450                              | 0.0047  | 1.430                               | 0.066   | 0.0716                               | 0.0023  | 0.71           | 873                                 | 27      | 902                                 | 28      | 973                                  | 67      | 0.00                            | 89.7                     |  |
| 24                               | 35                | 48          | y,t-0  | 0.1627                              | 0.0054  | 1.609                               | 0.074   | 0.0717                               | 0.0022  | 0.73           | 972                                 | 30      | 974                                 | 29      | 978                                  | 64      | 0.12                            | 99.3                     |  |
| 25a                              | 35                | 141         | y,t-0  | 0.1605                              | 0.0042  | 1.570                               | 0.052   | 0.0709                               | 0.0014  | 0.79           | 960                                 | 23      | 958                                 | 20      | 956                                  | 41      | 0.18                            | 100.4                    |  |
| 25b                              | 35                | 226         | y,t-0  | 0.1254                              | 0.0028  | 1.215                               | 0.036   | 0.0703                               | 0.0014  | 0.76           | 761                                 | 16      | 808                                 | 17      | 937                                  | 40      | 0.06                            | 81.3                     |  |
| 26                               | 35                | 42          | y,t-0  | 0.1615                              | 0.0035  | 1.635                               | 0.069   | 0.0734                               | 0.0026  | 0.52           | 965                                 | 20      | 984                                 | 27      | 1025                                 | 73      | 0.37                            | 94.1                     |  |
| 27                               | 35                | 95          | y,t-0  | 0.1522                              | 0.0033  | 1.514                               | 0.044   | 0.0721                               | 0.0014  | 0.74           | 913                                 | 18      | 936                                 | 18      | 990                                  | 40      | 0.19                            | 92.2                     |  |

\* Internally-unstandardized estimates based on count rates of <sup>238</sup>U only.

† Color of grains (b = brown, y,t = yellow-transparent, t = transparent, p = pink) and appearance in CL (0 = distinct, 1 = cloudy/patchy).

‡ Uncertainties are absolute internal 2 s.d.

§ Correlation coefficient between errors on <sup>207</sup>Pb/<sup>235</sup>U and <sup>206</sup>Pb/<sup>238</sup>U.

¶ Calculated using IsoPlot v. 3.72 (Ludwig, 2009) and applying the U-decay constant after Steiger and Jäger (1977).

<sup>1</sup> (<sup>206</sup>Pb/<sup>204</sup>Pb)<sub>common</sub> / (<sup>206</sup>Pb/<sup>204</sup>Pb)<sub>sample</sub>.

<sup>2</sup> 100 \* (<sup>206</sup>Pb/<sup>238</sup>U age) / (<sup>207</sup>Pb/<sup>206</sup>Pb age).

**Appendix B:** U-Pb isotope data and –ages from the LA-ICP-MS analysis of zircon (sample 08020).

| Analysis                         | Spot size<br>[μm] | U*<br>[ppm] | Color† | Ratios‡<br><sup>206</sup> Pb/ <sup>238</sup> U ± 2 s.d. |        | <sup>207</sup> Pb/ <sup>235</sup> U ± 2 s.d. | <sup>207</sup> Pb/ <sup>206</sup> Pb ± 2 s.d. | e <sup>§</sup> | Ages [Ma]<br><sup>206</sup> Pb/ <sup>238</sup> U ± 2 s.d. | <sup>207</sup> Pb/ <sup>235</sup> U ± 2 s.d. | <sup>207</sup> Pb/ <sup>206</sup> Pb ± 2 s.d. | f <sup>206</sup> % <sup>1</sup> | Concordance <sup>2</sup> |    |      |     |      |       |
|----------------------------------|-------------------|-------------|--------|---------------------------------------------------------|--------|----------------------------------------------|-----------------------------------------------|----------------|-----------------------------------------------------------|----------------------------------------------|-----------------------------------------------|---------------------------------|--------------------------|----|------|-----|------|-------|
| <i>Size fraction: 300-400 μm</i> |                   |             |        |                                                         |        |                                              |                                               |                |                                                           |                                              |                                               |                                 |                          |    |      |     |      |       |
| 28a                              | 35                | 91          | y,t-0  | 0.1470                                                  | 0.0041 | 1.410                                        | 0.047                                         | 0.0696         | 0.0013                                                    | 0.84                                         | 884                                           | 23                              | 893                      | 20 | 916  | 37  | 0.12 | 96.5  |
| 28b                              | 35                | 66          | y,t-0  | 0.1681                                                  | 0.0046 | 1.676                                        | 0.061                                         | 0.0723         | 0.0017                                                    | 0.75                                         | 1002                                          | 25                              | 999                      | 23 | 995  | 48  | 0.04 | 100.7 |
| 29                               | 35                | 39          | y,t-0  | 0.1474                                                  | 0.0043 | 1.407                                        | 0.053                                         | 0.0692         | 0.0017                                                    | 0.76                                         | 886                                           | 24                              | 892                      | 22 | 905  | 50  | 0.05 | 98.0  |
| 30                               | 35                | 114         | y,t-0  | 0.1265                                                  | 0.0038 | 1.194                                        | 0.046                                         | 0.0685         | 0.0016                                                    | 0.78                                         | 768                                           | 22                              | 798                      | 21 | 882  | 49  | 0.00 | 87.0  |
| 31a                              | 35                | 24          | y,t-0  | 0.1710                                                  | 0.0047 | 1.715                                        | 0.068                                         | 0.0727         | 0.0021                                                    | 0.69                                         | 1018                                          | 26                              | 1014                     | 26 | 1006 | 59  | 0.16 | 101.1 |
| 31b                              | 35                | 72          | y,t-0  | 0.1537                                                  | 0.0037 | 1.482                                        | 0.048                                         | 0.0699         | 0.0015                                                    | 0.75                                         | 922                                           | 21                              | 923                      | 20 | 926  | 44  | 0.06 | 99.5  |
| 32                               | 35                | 73          | y,t-0  | 0.1541                                                  | 0.0042 | 1.466                                        | 0.052                                         | 0.0690         | 0.0016                                                    | 0.77                                         | 924                                           | 23                              | 916                      | 21 | 899  | 46  | 0.00 | 102.8 |
| 33a                              | 35                | 1212        | y,t-1  | 0.1528                                                  | 0.0047 | 1.450                                        | 0.055                                         | 0.0689         | 0.0016                                                    | 0.81                                         | 916                                           | 26                              | 910                      | 23 | 895  | 47  | 0.01 | 102.4 |
| 33b                              | 35                | 887         | y,t-1  | 0.0851                                                  | 0.0035 | 0.731                                        | 0.033                                         | 0.0623         | 0.0012                                                    | 0.91                                         | 527                                           | 21                              | 557                      | 19 | 683  | 41  | 0.51 | 77.1  |
| 34                               | 35                | 59          | y,t-0  | 0.1581                                                  | 0.0046 | 1.545                                        | 0.055                                         | 0.0709         | 0.0015                                                    | 0.81                                         | 946                                           | 25                              | 948                      | 22 | 953  | 43  | 0.01 | 99.3  |
| 35                               | 35                | 145         | y,t-0  | 0.1254                                                  | 0.0036 | 1.165                                        | 0.039                                         | 0.0674         | 0.0011                                                    | 0.86                                         | 761                                           | 21                              | 784                      | 18 | 851  | 35  | 0.00 | 89.5  |
| 36                               | 35                | 174         | y,t-0  | 0.1585                                                  | 0.0046 | 1.552                                        | 0.051                                         | 0.0710         | 0.0011                                                    | 0.88                                         | 949                                           | 26                              | 951                      | 20 | 957  | 32  | 0.01 | 99.1  |
| 37a                              | 35                | 67          | y,t-0  | 0.1524                                                  | 0.0046 | 1.470                                        | 0.060                                         | 0.0700         | 0.0019                                                    | 0.74                                         | 914                                           | 26                              | 918                      | 25 | 928  | 57  | 0.16 | 98.5  |
| 37b                              | 35                | 88          | y,t-0  | 0.1507                                                  | 0.0051 | 1.445                                        | 0.062                                         | 0.0695         | 0.0019                                                    | 0.78                                         | 905                                           | 28                              | 908                      | 26 | 914  | 55  | 0.04 | 99.0  |
| 38a                              | 35                | 107         | y,t-0  | 0.1495                                                  | 0.0052 | 1.454                                        | 0.064                                         | 0.0705         | 0.0019                                                    | 0.79                                         | 898                                           | 29                              | 911                      | 27 | 944  | 55  | 0.00 | 95.2  |
| 38b                              | 35                | 112         | y,t-0  | 0.1482                                                  | 0.0041 | 1.438                                        | 0.053                                         | 0.0704         | 0.0017                                                    | 0.76                                         | 891                                           | 23                              | 905                      | 22 | 940  | 49  | 0.11 | 94.7  |
| 39                               | 35                | 106         | y,t-0  | 0.1526                                                  | 0.0042 | 1.455                                        | 0.054                                         | 0.0692         | 0.0017                                                    | 0.74                                         | 915                                           | 23                              | 912                      | 22 | 905  | 51  | 0.12 | 101.2 |
| 40                               | 35                | 90          | y,t-0  | 0.2084                                                  | 0.0048 | 2.331                                        | 0.080                                         | 0.0811         | 0.0021                                                    | 0.67                                         | 1220                                          | 26                              | 1222                     | 25 | 1225 | 50  | 0.14 | 99.6  |
| 41a                              | 35                | 53          | y,t-0  | 0.1532                                                  | 0.0034 | 1.481                                        | 0.056                                         | 0.0701         | 0.0021                                                    | 0.59                                         | 919                                           | 19                              | 922                      | 23 | 931  | 63  | 0.13 | 98.7  |
| 41b                              | 35                | 91          | y,t-0  | 0.1529                                                  | 0.0033 | 1.472                                        | 0.054                                         | 0.0698         | 0.0021                                                    | 0.59                                         | 917                                           | 18                              | 919                      | 22 | 924  | 61  | 0.00 | 99.3  |
| 42                               | 35                | 130         | y,t-0  | 0.1513                                                  | 0.0038 | 1.470                                        | 0.053                                         | 0.0705         | 0.0018                                                    | 0.69                                         | 908                                           | 21                              | 918                      | 22 | 942  | 54  | 0.08 | 96.5  |
| 43                               | 35                | 60          | y,t-0  | 0.1582                                                  | 0.0036 | 1.542                                        | 0.053                                         | 0.0707         | 0.0018                                                    | 0.66                                         | 947                                           | 20                              | 947                      | 21 | 948  | 53  | 0.14 | 99.9  |
| 44a                              | 35                | 627         | y,t-0  | 0.1494                                                  | 0.0033 | 1.423                                        | 0.036                                         | 0.0691         | 0.0008                                                    | 0.88                                         | 897                                           | 19                              | 899                      | 15 | 902  | 25  | 0.04 | 99.5  |
| 44b                              | 35                | 180         | y,t-0  | 0.0842                                                  | 0.0019 | 0.810                                        | 0.029                                         | 0.0698         | 0.0020                                                    | 0.62                                         | 521                                           | 11                              | 602                      | 16 | 922  | 58  | 0.00 | 56.5  |
| 45                               | 35                | 32          | y,t-0  | 0.1482                                                  | 0.0039 | 1.445                                        | 0.052                                         | 0.0707         | 0.0018                                                    | 0.72                                         | 891                                           | 22                              | 908                      | 22 | 949  | 51  | 0.00 | 93.9  |
| 46                               | 35                | 423         | y,t-1  | 0.1524                                                  | 0.0024 | 1.447                                        | 0.029                                         | 0.0689         | 0.0009                                                    | 0.78                                         | 914                                           | 14                              | 909                      | 12 | 896  | 26  | 0.07 | 102.0 |
| 47                               | 35                | 275         | y,t-0  | 0.1522                                                  | 0.0039 | 1.447                                        | 0.047                                         | 0.0689         | 0.0014                                                    | 0.79                                         | 913                                           | 22                              | 908                      | 19 | 897  | 41  | 0.00 | 101.8 |
| 48                               | 35                | 350         | y,t-0  | 0.1539                                                  | 0.0033 | 1.484                                        | 0.037                                         | 0.0700         | 0.0009                                                    | 0.86                                         | 923                                           | 19                              | 924                      | 15 | 927  | 26  | 0.06 | 99.5  |
| 49                               | 35                | 107         | y,t-0  | 0.1513                                                  | 0.0032 | 1.457                                        | 0.042                                         | 0.0699         | 0.0014                                                    | 0.72                                         | 908                                           | 18                              | 913                      | 18 | 925  | 42  | 0.05 | 98.2  |
| 50a                              | 35                | 78          | y,t-1  | 0.0881                                                  | 0.0025 | 0.746                                        | 0.027                                         | 0.0614         | 0.0014                                                    | 0.78                                         | 544                                           | 15                              | 566                      | 16 | 654  | 49  | 0.00 | 83.2  |
| 50b                              | 35                | 12          | y,t-0  | 0.1051                                                  | 0.0059 | 1.068                                        | 0.161                                         | 0.0737         | 0.0103                                                    | 0.37                                         | 644                                           | 34                              | 738                      | 79 | 1033 | 287 | 6.64 | 62.4  |
| 51                               | 35                | 71          | y,t-0  | 0.1599                                                  | 0.0037 | 1.626                                        | 0.054                                         | 0.0738         | 0.0017                                                    | 0.70                                         | 956                                           | 21                              | 980                      | 21 | 1035 | 48  | 0.24 | 92.4  |
| 52                               | 35                | 41          | y,t-0  | 0.1601                                                  | 0.0030 | 1.564                                        | 0.044                                         | 0.0709         | 0.0015                                                    | 0.66                                         | 957                                           | 17                              | 956                      | 17 | 954  | 43  | 0.48 | 100.3 |
| 53                               | 35                | 155         | y,t-0  | 0.1699                                                  | 0.0037 | 1.685                                        | 0.048                                         | 0.0720         | 0.0013                                                    | 0.77                                         | 1011                                          | 20                              | 1003                     | 18 | 985  | 37  | 0.03 | 102.7 |
| 54                               | 35                | 140         | y,t-0  | 0.1554                                                  | 0.0022 | 1.496                                        | 0.030                                         | 0.0698         | 0.0010                                                    | 0.72                                         | 931                                           | 12                              | 929                      | 12 | 922  | 28  | 0.02 | 101.0 |
| 55                               | 35                | 121         | y,t-0  | 0.1500                                                  | 0.0042 | 1.413                                        | 0.047                                         | 0.0683         | 0.0012                                                    | 0.85                                         | 901                                           | 24                              | 894                      | 20 | 877  | 37  | 0.00 | 102.7 |

\* Internally-unstandardized estimates based on count rates of <sup>238</sup>U only.

† Color of grains (b = brown, y,t = yellow-transparent, t = transparent, p = pink) and appearance in CL (0 = distinct, 1 = cloudy/patchy).

‡ Uncertainties are absolute internal 2 s.d.

§ Correlation coefficient between errors on <sup>207</sup>Pb/<sup>235</sup>U and <sup>206</sup>Pb/<sup>238</sup>U.

<sup>1</sup> Calculated using IsoPlot v. 3.72 (Ludwig, 2009) and applying the U-decay constant after Steiger and Jäger (1977).

<sup>2</sup> 100\*(<sup>206</sup>Pb/<sup>204</sup>Pb)<sub>common</sub>/(<sup>206</sup>Pb/<sup>204</sup>Pb)<sub>sample</sub>.

<sup>3</sup> 100\*(<sup>206</sup>Pb/<sup>238</sup>U age)/(<sup>207</sup>Pb/<sup>206</sup>Pb age).

**Appendix B:** U-Pb isotope data and –ages from the LA-ICP-MS analysis of zircon (sample 08020).

| Analysis                         | Spot size<br>[μm] | U*<br>[ppm] | Color† | Ratios‡    |         | 207Pb/235U |         | 207Pb/206Pb |         | ρ§   | Ages [Ma]  |         | 207Pb/235U |         | 207Pb/206Pb |         | f206‰¹ | Concordance² |  |
|----------------------------------|-------------------|-------------|--------|------------|---------|------------|---------|-------------|---------|------|------------|---------|------------|---------|-------------|---------|--------|--------------|--|
|                                  |                   |             |        | 206Pb/238U | ±2 s.d. | ±2 s.d.    | ±2 s.d. | ±2 s.d.     | ±2 s.d. |      | 206Pb/238U | ±2 s.d. | ±2 s.d.    | ±2 s.d. | ±2 s.d.     | ±2 s.d. |        |              |  |
| <b>Size fraction: 200-300 μm</b> |                   |             |        |            |         |            |         |             |         |      |            |         |            |         |             |         |        |              |  |
| 56                               | 35                | 572         | b-1    | 0.2290     | 0.0048  | 2.715      | 0.068   | 0.0860      | 0.0012  | 0.83 | 1329       | 25      | 1333       | 19      | 1338        | 27      | 0.15   | 99.4         |  |
| 57                               | 35                | 423         | b-1    | 0.2090     | 0.0045  | 2.360      | 0.066   | 0.0819      | 0.0014  | 0.78 | 1223       | 24      | 1230       | 20      | 1243        | 34      | 0.07   | 98.4         |  |
| 58                               | 35                | 282         | y,t-0  | 0.1218     | 0.0031  | 1.124      | 0.037   | 0.0669      | 0.0014  | 0.78 | 741        | 18      | 765        | 18      | 835         | 43      | 0.06   | 88.8         |  |
| 59                               | 25                | 53          | y,t-0  | 0.1554     | 0.0035  | 1.489      | 0.049   | 0.0695      | 0.0017  | 0.68 | 931        | 20      | 926        | 20      | 914         | 50      | 0.00   | 101.9        |  |
| 60a                              | 35                | 151         | y,t-0  | 0.1267     | 0.0041  | 1.213      | 0.064   | 0.0694      | 0.0029  | 0.61 | 769        | 23      | 806        | 29      | 911         | 87      | 0.10   | 84.4         |  |
| 60b                              | 35                | 96          | y,t-0  | 0.1115     | 0.0031  | 1.073      | 0.044   | 0.0698      | 0.0021  | 0.67 | 682        | 18      | 740        | 22      | 922         | 62      | 0.00   | 73.9         |  |
| 61a                              | 35                | 68          | y,t-0  | 0.1557     | 0.0034  | 1.496      | 0.057   | 0.0697      | 0.0022  | 0.57 | 933        | 19      | 929        | 23      | 919         | 64      | 0.01   | 101.5        |  |
| 61b                              | 35                | 262         | y,t-0  | 0.1559     | 0.0035  | 1.498      | 0.053   | 0.0697      | 0.0019  | 0.63 | 934        | 19      | 930        | 22      | 920         | 57      | 0.01   | 101.5        |  |
| 62a                              | 35                | 203         | y,t-0  | 0.1131     | 0.0025  | 1.086      | 0.039   | 0.0696      | 0.0020  | 0.62 | 691        | 15      | 746        | 19      | 917         | 59      | 0.10   | 75.4         |  |
| 62b                              | 35                | 43          | y,t-0  | 0.1527     | 0.0037  | 1.464      | 0.057   | 0.0695      | 0.0021  | 0.63 | 916        | 21      | 916        | 23      | 915         | 62      | 0.00   | 100.1        |  |
| 63a                              | 35                | 659         | y,t-0  | 0.1535     | 0.0032  | 1.479      | 0.047   | 0.0699      | 0.0017  | 0.66 | 920        | 18      | 922        | 19      | 925         | 49      | 0.00   | 99.5         |  |
| 63b                              | 25                | 259         | y,t-0  | 0.1295     | 0.0030  | 1.258      | 0.044   | 0.0704      | 0.0018  | 0.66 | 785        | 17      | 827        | 20      | 941         | 53      | 0.25   | 83.4         |  |
| 64a                              | 35                | 74          | y,t-0  | 0.1551     | 0.0036  | 1.497      | 0.053   | 0.0700      | 0.0019  | 0.66 | 929        | 20      | 929        | 22      | 929         | 55      | 0.00   | 100.0        |  |
| 64b                              | 35                | 609         | y,t-0  | 0.1523     | 0.0030  | 1.477      | 0.051   | 0.0703      | 0.0020  | 0.57 | 914        | 17      | 921        | 21      | 938         | 58      | 0.04   | 97.4         |  |
| 65a                              | 35                | 313         | y,t-0  | 0.1471     | 0.0040  | 1.402      | 0.045   | 0.0691      | 0.0011  | 0.86 | 885        | 23      | 890        | 19      | 902         | 34      | 0.01   | 98.1         |  |
| 65b                              | 35                | 38          | y,t-0  | 0.1589     | 0.0045  | 1.554      | 0.061   | 0.0710      | 0.0019  | 0.72 | 951        | 25      | 952        | 24      | 956         | 55      | 0.19   | 99.4         |  |
| 66a                              | 35                | 178         | y,t-0  | 0.1579     | 0.0038  | 1.523      | 0.049   | 0.0700      | 0.0015  | 0.75 | 945        | 21      | 940        | 20      | 927         | 43      | 0.05   | 101.9        |  |
| 66b                              | 35                | 103         | y,t-0  | 0.1581     | 0.0030  | 1.539      | 0.037   | 0.0706      | 0.0011  | 0.78 | 946        | 17      | 946        | 15      | 946         | 31      | 0.08   | 100.0        |  |
| 67a                              | 35                | 132         | y,t-0  | 0.1545     | 0.0045  | 1.492      | 0.051   | 0.0701      | 0.0013  | 0.85 | 926        | 25      | 927        | 21      | 930         | 37      | 0.00   | 99.6         |  |
| 67b                              | 35                | 295         | y,t-0  | 0.1515     | 0.0043  | 1.469      | 0.048   | 0.0704      | 0.0012  | 0.86 | 909        | 24      | 918        | 20      | 939         | 35      | 0.01   | 96.8         |  |
| 68a                              | 35                | 67          | y,t-0  | 0.1640     | 0.0032  | 1.621      | 0.050   | 0.0717      | 0.0017  | 0.64 | 979        | 18      | 978        | 19      | 978         | 49      | 0.00   | 100.1        |  |
| 68b                              | 35                | 71          | y,t-0  | 0.1548     | 0.0031  | 1.488      | 0.043   | 0.0697      | 0.0014  | 0.71 | 928        | 18      | 925        | 17      | 920         | 41      | 0.00   | 100.8        |  |
| 69a                              | 35                | 415         | y,t-0  | 0.1549     | 0.0027  | 1.489      | 0.033   | 0.0697      | 0.0009  | 0.79 | 928        | 15      | 926        | 14      | 921         | 28      | 0.01   | 100.8        |  |
| 69b                              | 35                | 99          | y,t-0  | 0.1524     | 0.0027  | 1.462      | 0.035   | 0.0696      | 0.0011  | 0.74 | 915        | 15      | 915        | 14      | 916         | 33      | 0.10   | 99.9         |  |
| 69c                              | 25                | 68          | y,t-0  | 0.0778     | 0.0012  | 0.683      | 0.022   | 0.0637      | 0.0018  | 0.49 | 483        | 7       | 528        | 13      | 731         | 60      | 0.00   | 66.1         |  |
| 70a                              | 35                | 146         | y,t-0  | 0.1550     | 0.0029  | 1.497      | 0.035   | 0.0701      | 0.0010  | 0.79 | 929        | 16      | 929        | 14      | 931         | 30      | 0.07   | 99.8         |  |
| 70b                              | 12                | 1856        | y,t-0  | 0.0807     | 0.0022  | 0.750      | 0.023   | 0.0674      | 0.0010  | 0.88 | 500        | 13      | 568        | 13      | 850         | 31      | 0.27   | 58.8         |  |
| <b>Size fraction: &lt;200 μm</b> |                   |             |        |            |         |            |         |             |         |      |            |         |            |         |             |         |        |              |  |
| 71                               | 35                | 160         | b-0    | 0.1483     | 0.0022  | 1.412      | 0.037   | 0.0691      | 0.0015  | 0.58 | 891        | 13      | 894        | 15      | 900         | 44      | 0.00   | 99.0         |  |
| 72                               | 35                | 511         | b-0    | 0.1538     | 0.0027  | 1.461      | 0.042   | 0.0689      | 0.0016  | 0.60 | 922        | 15      | 914        | 17      | 896         | 48      | 0.62   | 102.9        |  |
| 73                               | 35                | 202         | y,t-0  | 0.1562     | 0.0023  | 1.514      | 0.041   | 0.0703      | 0.0016  | 0.54 | 935        | 13      | 936        | 17      | 937         | 47      | 0.04   | 99.8         |  |
| 74                               | 35                | 66          | y,t-0  | 0.1502     | 0.0027  | 1.446      | 0.045   | 0.0698      | 0.0018  | 0.59 | 902        | 15      | 908        | 19      | 923         | 52      | 0.00   | 97.8         |  |
| 75                               | 25                | 488         | y,t-0  | 0.1057     | 0.0016  | 0.943      | 0.029   | 0.0647      | 0.0017  | 0.51 | 648        | 10      | 675        | 15      | 765         | 56      | 0.03   | 84.7         |  |
| 76                               | 12                | 85          | y,t-0  | 0.2458     | 0.0084  | 3.005      | 0.171   | 0.0886      | 0.0040  | 0.60 | 1417       | 43      | 1409       | 43      | 1397        | 87      | 0.00   | 101.5        |  |

\* Internally-unstandardized estimates based on count rates of 238 only.

† Color of grains (b = brown, y,t = yellow-transparent, t = transparent, p = pink) and appearance in CL. (0 = distinct, 1 = cloudy/patchy).

‡ Uncertainties are absolute internal 2 s.d.

§ Correlation coefficient between errors on 207Pb/235U and 206Pb/238U.

¶ Calculated using IsoPlot v. 3.72 (Ludwig, 2009) and applying the U-decay constant after Steiger and Jäger (1977).

¹  $(^{206}\text{Pb}/^{204}\text{Pb})_{\text{common}} / (^{206}\text{Pb}/^{204}\text{Pb})_{\text{sample}}$ .

²  $100 * (^{206}\text{Pb}/^{238}\text{U age}) / (^{207}\text{Pb}/^{206}\text{Pb age})$ .

**Appendix B:** U-Pb isotope data and –ages from the LA-ICP-MS analysis of zircon (sample 09019).

| Analysis                         | Spot size<br>[μm] | U*<br>[ppm] | Color† | Ratios‡                             |         | <sup>207</sup> Pb/ <sup>235</sup> U |         | <sup>207</sup> Pb/ <sup>206</sup> Pb |         | ρ <sup>§</sup> | Ages [Ma]                           |         | <sup>207</sup> Pb/ <sup>235</sup> U |         | <sup>207</sup> Pb/ <sup>206</sup> Pb |         | f <sup>206</sup> ¶ | Concordance <sup>2</sup> |  |
|----------------------------------|-------------------|-------------|--------|-------------------------------------|---------|-------------------------------------|---------|--------------------------------------|---------|----------------|-------------------------------------|---------|-------------------------------------|---------|--------------------------------------|---------|--------------------|--------------------------|--|
|                                  |                   |             |        | <sup>206</sup> Pb/ <sup>238</sup> U | ±2 s.d. |                                     | ±2 s.d. |                                      | ±2 s.d. |                | <sup>206</sup> Pb/ <sup>238</sup> U | ±2 s.d. |                                     | ±2 s.d. |                                      | ±2 s.d. |                    |                          |  |
| <b>Size fraction: &gt;400 μm</b> |                   |             |        |                                     |         |                                     |         |                                      |         |                |                                     |         |                                     |         |                                      |         |                    |                          |  |
| 01a                              | 35                | 105         | b-1    | 0.2039                              | 0.0034  | 2.294                               | 0.047   | 0.0816                               | 0.0010  | 0.81           | 1196                                | 18      | 1211                                | 14      | 1236                                 | 23      | 0.00               | 96.8                     |  |
| 01b                              | 35                | 242         | b-1    | 0.2149                              | 0.0043  | 2.440                               | 0.056   | 0.0824                               | 0.0009  | 0.88           | 1255                                | 23      | 1254                                | 17      | 1254                                 | 21      | 0.00               | 100.0                    |  |
| 02a                              | 35                | 691         | b-1    | 0.2169                              | 0.0038  | 2.468                               | 0.051   | 0.0825                               | 0.0009  | 0.84           | 1265                                | 20      | 1263                                | 15      | 1258                                 | 22      | 0.01               | 100.6                    |  |
| 02b                              | 35                | 307         | b-1    | 0.2156                              | 0.0055  | 2.446                               | 0.071   | 0.0823                               | 0.0011  | 0.89           | 1259                                | 29      | 1256                                | 21      | 1252                                 | 26      | 0.10               | 100.5                    |  |
| 03                               | 35                | 496         | b-0    | 0.1740                              | 0.0036  | 1.756                               | 0.039   | 0.0732                               | 0.0006  | 0.93           | 1034                                | 20      | 1029                                | 14      | 1019                                 | 17      | 0.03               | 101.5                    |  |
| <b>Size fraction: 300-400 μm</b> |                   |             |        |                                     |         |                                     |         |                                      |         |                |                                     |         |                                     |         |                                      |         |                    |                          |  |
| 04                               | 35                | 1706        | b-1    | 0.0762                              | 0.0016  | 0.596                               | 0.014   | 0.0567                               | 0.0007  | 0.87           | 474                                 | 9       | 475                                 | 9       | 481                                  | 25      | 0.15               | 98.4                     |  |
| 05                               | 35                | 684         | b-1    | 0.1785                              | 0.0032  | 1.840                               | 0.039   | 0.0747                               | 0.0008  | 0.85           | 1059                                | 18      | 1060                                | 14      | 1062                                 | 23      | 1.72               | 99.8                     |  |
| 06                               | 35                | 1385        | b-1    | 0.0986                              | 0.0017  | 0.824                               | 0.019   | 0.0606                               | 0.0010  | 0.73           | 606                                 | 10      | 610                                 | 11      | 624                                  | 34      | 1.19               | 97.1                     |  |
| 07                               | 35                | 1153        | b-1    | 0.1678                              | 0.0032  | 1.668                               | 0.039   | 0.0721                               | 0.0010  | 0.81           | 1000                                | 18      | 996                                 | 15      | 988                                  | 28      | 0.32               | 101.2                    |  |
| 08                               | 35                | 1195        | b-1    | 0.1717                              | 0.0042  | 1.727                               | 0.050   | 0.0729                               | 0.0011  | 0.85           | 1022                                | 23      | 1018                                | 19      | 1012                                 | 31      | 0.01               | 101.0                    |  |
| 09                               | 35                | 603         | b-1    | 0.2007                              | 0.0028  | 2.202                               | 0.045   | 0.0796                               | 0.0012  | 0.69           | 1179                                | 15      | 1182                                | 14      | 1187                                 | 29      | 0.01               | 99.3                     |  |
| 10a                              | 35                | 2143        | b-1    | 0.1550                              | 0.0022  | 1.511                               | 0.032   | 0.0707                               | 0.0011  | 0.67           | 929                                 | 12      | 935                                 | 13      | 949                                  | 32      | 0.15               | 97.9                     |  |
| 10b                              | 12                | 589         | b-1    | 0.1667                              | 0.0068  | 1.649                               | 0.077   | 0.0717                               | 0.0016  | 0.88           | 994                                 | 38      | 989                                 | 30      | 978                                  | 46      | 0.13               | 101.6                    |  |
| 11a                              | 35                | 998         | b-1    | 0.2248                              | 0.0025  | 2.655                               | 0.050   | 0.0857                               | 0.0013  | 0.59           | 1307                                | 13      | 1316                                | 14      | 1331                                 | 29      | 0.19               | 98.2                     |  |
| 11b                              | 25                | 159         | b-1    | 0.2292                              | 0.0036  | 2.670                               | 0.063   | 0.0845                               | 0.0015  | 0.66           | 1330                                | 19      | 1320                                | 17      | 1304                                 | 34      | 0.05               | 102.0                    |  |
| 12                               | 35                | 707         | b-1    | 0.0751                              | 0.0013  | 0.578                               | 0.017   | 0.0558                               | 0.0013  | 0.60           | 467                                 | 8       | 463                                 | 11      | 443                                  | 53      | 0.72               | 105.4                    |  |
| 13                               | 35                | 150         | b-0    | 0.5473                              | 0.0084  | 14.717                              | 0.335   | 0.1950                               | 0.0033  | 0.68           | 2814                                | 35      | 2797                                | 22      | 2785                                 | 27      | 0.32               | 101.0                    |  |
| 14                               | 35                | 198         | p-0    | 0.3079                              | 0.0044  | 4.486                               | 0.100   | 0.1057                               | 0.0018  | 0.64           | 1730                                | 22      | 1728                                | 18      | 1726                                 | 31      | 0.00               | 100.3                    |  |
| 15a                              | 35                | 47          | p-0    | 0.1733                              | 0.0028  | 1.765                               | 0.054   | 0.0738                               | 0.0019  | 0.52           | 1030                                | 15      | 1033                                | 20      | 1037                                 | 53      | 0.00               | 99.4                     |  |
| 15b                              | 35                | 198         | p-0    | 0.1651                              | 0.0024  | 1.662                               | 0.046   | 0.0730                               | 0.0017  | 0.52           | 985                                 | 13      | 994                                 | 18      | 1014                                 | 48      | 0.00               | 97.1                     |  |
| 16a                              | 35                | 148         | p-0    | 0.1714                              | 0.0018  | 1.733                               | 0.043   | 0.0733                               | 0.0016  | 0.43           | 1020                                | 10      | 1021                                | 16      | 1023                                 | 45      | 0.09               | 99.6                     |  |
| 16b                              | 35                | 145         | p-0    | 0.1746                              | 0.0022  | 1.770                               | 0.046   | 0.0735                               | 0.0017  | 0.49           | 1038                                | 12      | 1035                                | 17      | 1028                                 | 46      | 0.04               | 100.9                    |  |
| 17a                              | 35                | 89          | p-0    | 0.1776                              | 0.0025  | 1.825                               | 0.049   | 0.0745                               | 0.0017  | 0.52           | 1054                                | 14      | 1055                                | 17      | 1056                                 | 46      | 0.00               | 99.8                     |  |
| 17b                              | 35                | 64          | p-0    | 0.1775                              | 0.0027  | 1.835                               | 0.044   | 0.0750                               | 0.0014  | 0.64           | 1053                                | 15      | 1058                                | 16      | 1068                                 | 37      | 0.00               | 98.6                     |  |
| 18a                              | 35                | 104         | p-0    | 0.1979                              | 0.0025  | 2.138                               | 0.045   | 0.0783                               | 0.0013  | 0.60           | 1164                                | 13      | 1161                                | 15      | 1156                                 | 33      | 0.05               | 100.7                    |  |
| 18b                              | 35                | 70          | p-0    | 0.1964                              | 0.0026  | 2.105                               | 0.052   | 0.0777                               | 0.0016  | 0.53           | 1156                                | 14      | 1151                                | 17      | 1140                                 | 41      | 0.07               | 101.4                    |  |
| 19                               | 35                | 238         | t-0    | 0.1005                              | 0.0016  | 0.834                               | 0.019   | 0.0602                               | 0.0010  | 0.70           | 617                                 | 10      | 616                                 | 11      | 610                                  | 36      | 0.00               | 101.1                    |  |
| 20a                              | 35                | 388         | t-0    | 0.2009                              | 0.0057  | 2.181                               | 0.071   | 0.0787                               | 0.0013  | 0.87           | 1180                                | 31      | 1175                                | 23      | 1165                                 | 32      | 0.60               | 101.3                    |  |
| 20b                              | 25                | 135         | t-1    | 0.2020                              | 0.0045  | 2.196                               | 0.058   | 0.0788                               | 0.0011  | 0.85           | 1186                                | 24      | 1180                                | 19      | 1168                                 | 28      | 0.12               | 101.6                    |  |
| 21a                              | 35                | 138         | t-0    | 0.2019                              | 0.0039  | 2.197                               | 0.051   | 0.0789                               | 0.0010  | 0.82           | 1186                                | 21      | 1180                                | 16      | 1170                                 | 26      | 0.05               | 101.3                    |  |
| 21b                              | 25                | 34          | t-0    | 0.2024                              | 0.0058  | 2.198                               | 0.085   | 0.0788                               | 0.0020  | 0.75           | 1188                                | 31      | 1181                                | 27      | 1167                                 | 51      | 0.05               | 101.8                    |  |
| 22                               | 35                | 74          | t-0    | 0.1811                              | 0.0031  | 1.865                               | 0.042   | 0.0747                               | 0.0011  | 0.76           | 1073                                | 17      | 1069                                | 15      | 1060                                 | 30      | 0.05               | 101.2                    |  |

\* Internally-unstandardized estimates based on count rates of <sup>238</sup>U only.

† Color of grains (b = brown, y,t = yellow-transparent, t = transparent, p = pink) and appearance in CL (0 = distinct, 1 = cloudy/patchy).

‡ Uncertainties are absolute internal 2 s.d.

§ Correlation coefficient between errors on <sup>207</sup>Pb/<sup>235</sup>U and <sup>206</sup>Pb/<sup>238</sup>U.

¶ Calculated using IsoPlot v. 3.72 (Ludwig, 2009) and applying the U-decay constant after Steiger and Jäger (1977).

<sup>1</sup> (<sup>206</sup>Pb/<sup>204</sup>Pb)<sub>common</sub> / (<sup>206</sup>Pb/<sup>204</sup>Pb)<sub>sample</sub>.

<sup>2</sup> 100 \* (<sup>206</sup>Pb/<sup>238</sup>U age) / (<sup>207</sup>Pb/<sup>206</sup>Pb age).

**Appendix B:** U-Pb isotope data and –ages from the LA-ICP-MS analysis of zircon (sample 09019).

| Analysis                         | Spot size<br>[μm] | U*<br>[ppm] | Color† | Ratios‡                             |          | <sup>207</sup> Pb/ <sup>235</sup> U |          | <sup>207</sup> Pb/ <sup>206</sup> Pb |          | ϕ <sup>§</sup> | Ages [Ma] |          | <sup>207</sup> Pb/ <sup>235</sup> U |    | <sup>207</sup> Pb/ <sup>206</sup> Pb |    | f <sup>206</sup> Pb <sup>¶</sup> | Concordance <sup>2</sup> |  |
|----------------------------------|-------------------|-------------|--------|-------------------------------------|----------|-------------------------------------|----------|--------------------------------------|----------|----------------|-----------|----------|-------------------------------------|----|--------------------------------------|----|----------------------------------|--------------------------|--|
|                                  |                   |             |        | <sup>206</sup> Pb/ <sup>238</sup> U | ± 2 s.d. | ± 2 s.d.                            | ± 2 s.d. | ± 2 s.d.                             | ± 2 s.d. |                | ± 2 s.d.  | ± 2 s.d. |                                     |    |                                      |    |                                  |                          |  |
| <i>Size fraction: 300-400 μm</i> |                   |             |        |                                     |          |                                     |          |                                      |          |                |           |          |                                     |    |                                      |    |                                  |                          |  |
| 23                               | 35                | 380         | t-0    | 0.1811                              | 0.0055   | 1.866                               | 0.064    | 0.0747                               | 0.0012   | 0.89           | 1073      | 30       | 1069                                | 23 | 1062                                 | 32 | 0.01                             | 101.1                    |  |
| 24                               | 35                | 40          | t-0    | 0.2684                              | 0.0065   | 3.513                               | 0.101    | 0.0949                               | 0.0015   | 0.84           | 1533      | 33       | 1530                                | 23 | 1527                                 | 30 | 0.04                             | 100.4                    |  |
| 25                               | 35                | 23          | t-0    | 0.1668                              | 0.0040   | 1.658                               | 0.060    | 0.0721                               | 0.0020   | 0.66           | 995       | 22       | 993                                 | 23 | 988                                  | 56 | 0.00                             | 100.6                    |  |
| 26                               | 35                | 15          | t-0    | 0.1881                              | 0.0043   | 1.978                               | 0.075    | 0.0763                               | 0.0023   | 0.60           | 1111      | 23       | 1108                                | 25 | 1102                                 | 60 | 0.11                             | 100.8                    |  |
| 27a                              | 35                | 82          | t-1    | 0.2336                              | 0.0043   | 2.800                               | 0.071    | 0.0869                               | 0.0015   | 0.72           | 1353      | 22       | 1355                                | 19 | 1359                                 | 34 | 0.11                             | 99.6                     |  |
| 27b                              | 25                | 25          | t-1    | 0.2400                              | 0.0080   | 2.891                               | 0.145    | 0.0873                               | 0.0033   | 0.67           | 1387      | 42       | 1379                                | 38 | 1368                                 | 72 | 0.33                             | 101.4                    |  |
| <i>Size fraction: 200-300 μm</i> |                   |             |        |                                     |          |                                     |          |                                      |          |                |           |          |                                     |    |                                      |    |                                  |                          |  |
| 28a                              | 35                | 462         | b-1    | 0.2909                              | 0.0068   | 4.074                               | 0.115    | 0.1016                               | 0.0016   | 0.83           | 1646      | 34       | 1649                                | 23 | 1653                                 | 29 | 0.07                             | 99.6                     |  |
| 28b                              | 35                | 619         | b-1    | 0.2972                              | 0.0049   | 4.177                               | 0.089    | 0.1019                               | 0.0014   | 0.78           | 1677      | 24       | 1669                                | 17 | 1660                                 | 25 | 0.04                             | 101.1                    |  |
| 29a                              | 35                | 151         | b-1    | 0.5435                              | 0.0076   | 14.685                              | 0.258    | 0.1960                               | 0.0021   | 0.79           | 2798      | 32       | 2795                                | 17 | 2793                                 | 18 | 0.00                             | 100.2                    |  |
| 29b                              | 35                | 820         | b-1    | 0.1071                              | 0.0020   | 1.472                               | 0.040    | 0.0996                               | 0.0020   | 0.67           | 656       | 11       | 919                                 | 17 | 1617                                 | 38 | 0.29                             | 40.6                     |  |
| 30a                              | 35                | 755         | b-1    | 0.1723                              | 0.0049   | 1.736                               | 0.063    | 0.0731                               | 0.0016   | 0.79           | 1025      | 27       | 1022                                | 23 | 1016                                 | 44 | 0.06                             | 100.8                    |  |
| 30b                              | 35                | 1353        | b-1    | 0.1683                              | 0.0044   | 1.671                               | 0.055    | 0.0720                               | 0.0015   | 0.79           | 1003      | 24       | 998                                 | 21 | 986                                  | 42 | 0.01                             | 101.7                    |  |
| 31a                              | 35                | 25          | p-0    | 0.2114                              | 0.0063   | 2.345                               | 0.111    | 0.0805                               | 0.0030   | 0.63           | 1236      | 33       | 1226                                | 34 | 1208                                 | 73 | 0.00                             | 102.3                    |  |
| 31b                              | 25                | 108         | p-0    | 0.1829                              | 0.0046   | 1.924                               | 0.076    | 0.0763                               | 0.0023   | 0.64           | 1083      | 25       | 1090                                | 26 | 1104                                 | 61 | 0.39                             | 98.1                     |  |
| 32                               | 35                | 72          | p-0    | 0.5736                              | 0.0152   | 16.397                              | 0.573    | 0.2073                               | 0.0047   | 0.76           | 2923      | 62       | 2900                                | 33 | 2885                                 | 37 | 0.10                             | 101.3                    |  |
| 33                               | 35                | 1074        | p-0    | 0.1863                              | 0.0050   | 1.944                               | 0.061    | 0.0757                               | 0.0013   | 0.85           | 1101      | 27       | 1096                                | 21 | 1086                                 | 33 | 0.02                             | 101.4                    |  |
| 34a                              | 35                | 42          | p-0    | 0.1886                              | 0.0054   | 1.977                               | 0.074    | 0.0760                               | 0.0019   | 0.76           | 1114      | 29       | 1108                                | 25 | 1096                                 | 49 | 0.15                             | 101.6                    |  |
| 34b                              | 35                | 113         | p-0    | 0.1786                              | 0.0048   | 1.827                               | 0.061    | 0.0742                               | 0.0015   | 0.81           | 1060      | 26       | 1055                                | 22 | 1046                                 | 40 | 0.07                             | 101.3                    |  |
| 35a                              | 35                | 378         | p-1    | 0.2923                              | 0.0075   | 4.036                               | 0.121    | 0.1001                               | 0.0015   | 0.86           | 1653      | 38       | 1641                                | 24 | 1627                                 | 29 | 0.03                             | 101.6                    |  |
| 35b                              | 25                | 410         | p-0    | 0.2096                              | 0.0037   | 2.781                               | 0.078    | 0.0962                               | 0.0021   | 0.64           | 1227      | 20       | 1350                                | 21 | 1552                                 | 40 | 0.09                             | 79.0                     |  |
| 36a                              | 35                | 74          | p-0    | 0.2384                              | 0.0049   | 2.889                               | 0.085    | 0.0879                               | 0.0018   | 0.70           | 1378      | 25       | 1379                                | 22 | 1380                                 | 40 | 0.25                             | 99.9                     |  |
| 36b                              | 35                | 196         | p-0    | 0.2925                              | 0.0067   | 4.036                               | 0.109    | 0.1001                               | 0.0015   | 0.84           | 1654      | 33       | 1641                                | 22 | 1626                                 | 27 | 0.00                             | 101.7                    |  |
| 37a                              | 35                | 128         | p-0    | 0.1886                              | 0.0043   | 1.973                               | 0.058    | 0.0759                               | 0.0014   | 0.78           | 1114      | 23       | 1106                                | 20 | 1092                                 | 37 | 0.00                             | 102.0                    |  |
| 37b                              | 35                | 492         | p-0    | 0.1788                              | 0.0035   | 1.844                               | 0.045    | 0.0748                               | 0.0011   | 0.80           | 1060      | 19       | 1061                                | 16 | 1063                                 | 29 | 0.06                             | 99.7                     |  |
| 38a                              | 35                | 45          | t-0    | 0.1805                              | 0.0037   | 1.879                               | 0.055    | 0.0755                               | 0.0016   | 0.70           | 1070      | 20       | 1074                                | 19 | 1081                                 | 42 | 0.10                             | 98.9                     |  |
| 38b                              | 35                | 319         | t-0    | 0.1802                              | 0.0027   | 1.880                               | 0.045    | 0.0757                               | 0.0014   | 0.64           | 1068      | 15       | 1074                                | 16 | 1087                                 | 37 | 0.05                             | 98.3                     |  |
| 39a                              | 35                | 43          | t-0    | 0.1811                              | 0.0031   | 1.882                               | 0.062    | 0.0753                               | 0.0021   | 0.52           | 1073      | 17       | 1075                                | 22 | 1078                                 | 56 | 0.10                             | 99.6                     |  |
| 39b                              | 35                | 28          | t-0    | 0.1801                              | 0.0051   | 1.872                               | 0.077    | 0.0754                               | 0.0023   | 0.68           | 1067      | 28       | 1071                                | 27 | 1079                                 | 61 | 0.13                             | 99.0                     |  |
| 40a                              | 35                | 15          | t-0    | 0.2406                              | 0.0053   | 2.948                               | 0.118    | 0.0889                               | 0.0030   | 0.55           | 1390      | 28       | 1394                                | 30 | 1401                                 | 64 | 0.49                             | 99.2                     |  |
| 40b                              | 35                | 131         | t-0    | 0.2191                              | 0.0039   | 2.486                               | 0.065    | 0.0823                               | 0.0016   | 0.68           | 1277      | 21       | 1268                                | 19 | 1252                                 | 37 | 0.04                             | 102.0                    |  |
| 41a                              | 35                | 83          | t-0    | 0.2074                              | 0.0028   | 2.277                               | 0.056    | 0.0796                               | 0.0016   | 0.54           | 1215      | 15       | 1205                                | 17 | 1188                                 | 41 | 0.19                             | 102.3                    |  |
| 41b                              | 35                | 113         | t-0    | 0.1915                              | 0.0025   | 2.027                               | 0.049    | 0.0767                               | 0.0016   | 0.55           | 1130      | 14       | 1124                                | 16 | 1114                                 | 40 | 0.03                             | 101.4                    |  |

\* Internally-unstandardized estimates based on count rates of <sup>238</sup>U only.

† Color of grains (b = brown, y,t = yellow-transparent, t = transparent, p = pink) and appearance in CL (0 = distinct, 1 = cloudy/patchy).

‡ Uncertainties are absolute internal 2 s.d.

§ Correlation coefficient between errors on <sup>207</sup>Pb/<sup>235</sup>U and <sup>206</sup>Pb/<sup>238</sup>U.

¶ Calculated using IsoPlot v. 3.72 (Ludwig, 2009) and applying the U-decay constant after Steiger and Jäger (1977).

<sup>1</sup> (<sup>206</sup>Pb/<sup>204</sup>Pb)<sub>common</sub> / (<sup>206</sup>Pb/<sup>204</sup>Pb)<sub>sample</sub>.

<sup>2</sup> 100 \* (<sup>206</sup>Pb/<sup>238</sup>U age) / (<sup>207</sup>Pb/<sup>206</sup>Pb age).

**Appendix B:** U-Pb isotope data and –ages from the LA-ICP-MS analysis of zircon (sample 09019).

| Analysis                                               | Spot size<br>[ $\mu\text{m}$ ] | U*<br>[ppm] | Color† | Ratios‡<br>$^{206}\text{Pb}/^{238}\text{U}$ $\pm 2$ s.d. |        | $^{207}\text{Pb}/^{235}\text{U}$ | $\pm 2$ s.d. | $^{207}\text{Pb}/^{206}\text{Pb}$ | $\pm 2$ s.d. | $\rho^{\S}$ | Ages [Ma]<br>$^{206}\text{Pb}/^{238}\text{U}$ $\pm 2$ s.d. |     | $^{207}\text{Pb}/^{235}\text{U}$ | $\pm 2$ s.d. | $^{207}\text{Pb}/^{206}\text{Pb}$ | $\pm 2$ s.d. | $f^{206\%1}$ | Concordance <sup>2</sup> |
|--------------------------------------------------------|--------------------------------|-------------|--------|----------------------------------------------------------|--------|----------------------------------|--------------|-----------------------------------|--------------|-------------|------------------------------------------------------------|-----|----------------------------------|--------------|-----------------------------------|--------------|--------------|--------------------------|
| <b>Size fraction: 200-300 <math>\mu\text{m}</math></b> |                                |             |        |                                                          |        |                                  |              |                                   |              |             |                                                            |     |                                  |              |                                   |              |              |                          |
| 42a                                                    | 35                             | 44          | t-0    | 0.1847                                                   | 0.0057 | 1.901                            | 0.074        | 0.0747                            | 0.0017       | 0.80        | 1093                                                       | 31  | 1082                             | 26           | 1059                              | 47           | 0.14         | 103.1                    |
| 42b                                                    | 35                             | 36          | t-0    | 0.1685                                                   | 0.0038 | 1.699                            | 0.058        | 0.0731                            | 0.0019       | 0.65        | 1004                                                       | 21  | 1008                             | 22           | 1017                              | 53           | 0.29         | 98.7                     |
| 43                                                     | 35                             | 61          | t-0    | 0.1807                                                   | 0.0044 | 1.855                            | 0.071        | 0.0745                            | 0.0022       | 0.64        | 1071                                                       | 24  | 1065                             | 25           | 1054                              | 59           | 0.00         | 101.6                    |
| 44a                                                    | 35                             | 28          | t-0    | 0.2810                                                   | 0.0056 | 3.801                            | 0.138        | 0.0981                            | 0.0030       | 0.55        | 1597                                                       | 28  | 1593                             | 29           | 1588                              | 57           | 0.00         | 100.5                    |
| 44b                                                    | 35                             | 44          | t-0    | 0.2262                                                   | 0.0052 | 2.688                            | 0.099        | 0.0862                            | 0.0025       | 0.62        | 1315                                                       | 27  | 1325                             | 27           | 1342                              | 56           | 0.00         | 97.9                     |
| 45a                                                    | 35                             | 25          | t-0    | 0.1790                                                   | 0.0034 | 1.825                            | 0.069        | 0.0740                            | 0.0024       | 0.50        | 1061                                                       | 18  | 1055                             | 25           | 1041                              | 66           | 0.00         | 102.0                    |
| 45b                                                    | 25                             | 44          | t-0    | 0.1616                                                   | 0.0027 | 1.591                            | 0.062        | 0.0714                            | 0.0025       | 0.43        | 965                                                        | 15  | 967                              | 24           | 970                               | 72           | 0.00         | 99.5                     |
| 45c                                                    | 12                             | 31          | t-0    | 0.1633                                                   | 0.0084 | 1.602                            | 0.119        | 0.0712                            | 0.0038       | 0.69        | 975                                                        | 47  | 971                              | 47           | 962                               | 110          | 6.40         | 101.3                    |
| 46a                                                    | 35                             | 52          | t-0    | 0.2927                                                   | 0.0073 | 4.102                            | 0.155        | 0.1016                            | 0.0029       | 0.66        | 1655                                                       | 37  | 1655                             | 31           | 1654                              | 52           | 0.11         | 100.0                    |
| 46b                                                    | 25                             | 72          | t-0    | 0.2799                                                   | 0.0057 | 3.794                            | 0.142        | 0.0983                            | 0.0031       | 0.54        | 1591                                                       | 29  | 1591                             | 30           | 1593                              | 59           | 0.00         | 99.9                     |
| 47a                                                    | 35                             | 21          | t-0    | 0.1559                                                   | 0.0054 | 1.520                            | 0.139        | 0.0707                            | 0.0060       | 0.38        | 934                                                        | 30  | 938                              | 56           | 949                               | 174          | 0.80         | 98.4                     |
| 47b                                                    | 25                             | 9           | t-0    | 0.1604                                                   | 0.0065 | 1.563                            | 0.109        | 0.0707                            | 0.0040       | 0.58        | 959                                                        | 36  | 956                              | 43           | 948                               | 117          | 0.27         | 101.1                    |
| 48a                                                    | 35                             | 39          | t-0    | 0.2277                                                   | 0.0033 | 2.668                            | 0.087        | 0.0850                            | 0.0025       | 0.44        | 1323                                                       | 17  | 1320                             | 24           | 1315                              | 57           | 0.18         | 100.6                    |
| 48b                                                    | 35                             | 21          | t-0    | 0.1682                                                   | 0.0038 | 1.935                            | 0.108        | 0.0834                            | 0.0042       | 0.41        | 1002                                                       | 21  | 1093                             | 37           | 1279                              | 99           | 0.00         | 78.4                     |
| 49a                                                    | 35                             | 36          | t-0    | 0.1829                                                   | 0.0040 | 1.890                            | 0.075        | 0.0750                            | 0.0025       | 0.55        | 1083                                                       | 22  | 1078                             | 26           | 1067                              | 67           | 0.25         | 101.5                    |
| 49b                                                    | 35                             | 73          | t-0    | 0.1854                                                   | 0.0043 | 1.957                            | 0.076        | 0.0766                            | 0.0024       | 0.60        | 1096                                                       | 24  | 1101                             | 26           | 1110                              | 62           | 0.23         | 98.8                     |
| 50a                                                    | 35                             | 294         | b-0    | 0.6262                                                   | 0.0092 | 21.036                           | 0.608        | 0.2437                            | 0.0061       | 0.51        | 3134                                                       | 36  | 3140                             | 28           | 3144                              | 40           | 0.02         | 99.7                     |
| 50b                                                    | 25                             | 884         | b-0    | 0.0960                                                   | 0.0018 | 0.995                            | 0.033        | 0.0751                            | 0.0021       | 0.56        | 591                                                        | 11  | 701                              | 17           | 1072                              | 56           | 0.51         | 55.1                     |
| 51a                                                    | 35                             | 91          | t-0    | 0.1723                                                   | 0.0035 | 1.744                            | 0.045        | 0.0734                            | 0.0012       | 0.79        | 1025                                                       | 19  | 1025                             | 17           | 1026                              | 32           | 0.07         | 99.8                     |
| 51b                                                    | 25                             | 247         | t-0    | 0.1713                                                   | 0.0029 | 1.738                            | 0.040        | 0.0736                            | 0.0012       | 0.73        | 1019                                                       | 16  | 1023                             | 15           | 1030                              | 32           | 0.04         | 98.9                     |
| 52a                                                    | 35                             | 116         | t-0    | 0.1945                                                   | 0.0043 | 2.087                            | 0.058        | 0.0779                            | 0.0013       | 0.79        | 1145                                                       | 23  | 1145                             | 19           | 1143                              | 34           | 0.13         | 100.2                    |
| 52b                                                    | 35                             | 182         | t-0    | 0.1782                                                   | 0.0045 | 1.898                            | 0.060        | 0.0773                            | 0.0014       | 0.81        | 1057                                                       | 25  | 1081                             | 21           | 1128                              | 37           | 0.09         | 93.7                     |
| <b>Size fraction: &lt;200 <math>\mu\text{m}</math></b> |                                |             |        |                                                          |        |                                  |              |                                   |              |             |                                                            |     |                                  |              |                                   |              |              |                          |
| 53                                                     | 35                             | 200         | b-1    | 0.5215                                                   | 0.0045 | 13.338                           | 0.339        | 0.1855                            | 0.0044       | 0.34        | 2706                                                       | 19  | 2704                             | 24           | 2703                              | 39           | 0.02         | 100.1                    |
| 54                                                     | 35                             | 450         | b-1    | 0.2103                                                   | 0.0038 | 2.368                            | 0.071        | 0.0816                            | 0.0019       | 0.61        | 1231                                                       | 20  | 1233                             | 21           | 1237                              | 47           | 0.05         | 99.5                     |
| 55                                                     | 35                             | 453         | b-1    | 0.2867                                                   | 0.0039 | 6.394                            | 0.184        | 0.1617                            | 0.0041       | 0.47        | 1625                                                       | 19  | 2031                             | 25           | 2474                              | 43           | 0.20         | 65.7                     |
| 56                                                     | 35                             | 430         | b-0    | 0.1790                                                   | 0.0024 | 1.866                            | 0.054        | 0.0756                            | 0.0019       | 0.47        | 1061                                                       | 13  | 1069                             | 19           | 1085                              | 51           | 0.08         | 97.8                     |
| 57a                                                    | 35                             | 264         | p-0    | 0.2074                                                   | 0.0041 | 2.303                            | 0.070        | 0.0806                            | 0.0019       | 0.64        | 1215                                                       | 22  | 1213                             | 22           | 1211                              | 46           | 0.04         | 100.3                    |
| 57b                                                    | 35                             | 205         | p-0    | 0.1992                                                   | 0.0037 | 2.191                            | 0.062        | 0.0798                            | 0.0017       | 0.66        | 1171                                                       | 20  | 1178                             | 20           | 1191                              | 42           | 0.02         | 98.3                     |
| 58                                                     | 35                             | 275         | p-0    | 0.1986                                                   | 0.0046 | 2.166                            | 0.074        | 0.0791                            | 0.0020       | 0.68        | 1168                                                       | 25  | 1170                             | 24           | 1174                              | 50           | 0.10         | 99.5                     |
| 59                                                     | 12                             | 81          | p-0    | 0.1903                                                   | 0.0210 | 2.278                            | 0.294        | 0.0868                            | 0.0058       | 0.85        | 1123                                                       | 114 | 1205                             | 91           | 1356                              | 130          | 0.02         | 82.8                     |
| 60                                                     | 35                             | 142         | p-0    | 0.1730                                                   | 0.0034 | 1.738                            | 0.053        | 0.0729                            | 0.0017       | 0.65        | 1029                                                       | 19  | 1023                             | 20           | 1010                              | 47           | 0.11         | 101.8                    |
| 61                                                     | 25                             | 348         | t-0    | 0.2587                                                   | 0.0062 | 3.321                            | 0.134        | 0.0931                            | 0.0030       | 0.59        | 1483                                                       | 32  | 1486                             | 32           | 1491                              | 62           | 0.07         | 99.5                     |

\* Internally-unstandardized estimates based on count rates of 238 only.

† Color of grains (b = brown, y,t = yellow-transparent, t = transparent, p = pink) and appearance in CL (0 = distinct, 1 = cloudy/patchy).

‡ Uncertainties are absolute internal 2 s.d.

$\rho^{\S}$  Correlation coefficient between errors on  $^{207}\text{Pb}/^{235}\text{U}$  and  $^{206}\text{Pb}/^{238}\text{U}$ .

$\uparrow$  Calculated using IsoPlot v. 3.72 (Ludwig, 2009) and applying the U-decay constant after Steiger and Jäger (1977).

<sup>1</sup>  $(^{206}\text{Pb}/^{204}\text{Pb})_{\text{common}} / (^{206}\text{Pb}/^{204}\text{Pb})_{\text{sample}}$ .

<sup>2</sup>  $100 * (^{206}\text{Pb}/^{238}\text{U age}) / (^{207}\text{Pb}/^{206}\text{Pb age})$ .

**Appendix B:** U-Pb isotope data and –ages from the LA-ICP-MS analysis of zircon (sample 09019).

| Analysis                                               | Spot size<br>[ $\mu\text{m}$ ] | U*<br>[ppm] | Color† | Ratios‡                          |              | $^{207}\text{Pb}/^{235}\text{U}$ | $\pm 2$ s.d. | $^{207}\text{Pb}/^{206}\text{Pb}$ | $\pm 2$ s.d. | $\rho^{\S}$ | Ages [Ma]                        |              | $\pm 2$ s.d. | $^{207}\text{Pb}/^{235}\text{U}$ | $\pm 2$ s.d. | $^{207}\text{Pb}/^{206}\text{Pb}$ | $\pm 2$ s.d. | $f^{206\%}$ <sup>1</sup> | Concordance <sup>2</sup> |
|--------------------------------------------------------|--------------------------------|-------------|--------|----------------------------------|--------------|----------------------------------|--------------|-----------------------------------|--------------|-------------|----------------------------------|--------------|--------------|----------------------------------|--------------|-----------------------------------|--------------|--------------------------|--------------------------|
|                                                        |                                |             |        | $^{206}\text{Pb}/^{238}\text{U}$ | $\pm 2$ s.d. |                                  |              |                                   |              |             | $^{206}\text{Pb}/^{238}\text{U}$ | $\pm 2$ s.d. |              |                                  |              |                                   |              |                          |                          |
| <b>Size fraction: &lt;200 <math>\mu\text{m}</math></b> |                                |             |        |                                  |              |                                  |              |                                   |              |             |                                  |              |              |                                  |              |                                   |              |                          |                          |
| 62                                                     | 35                             | 113         | t-0    | 0.1726                           | 0.0042       | 1.737                            | 0.057        | 0.0730                            | 0.0016       | 0.75        | 1026                             | 23           | 1022         | 21                               | 1014         | 44                                | 0.01         | 101.2                    |                          |
| 63                                                     | 35                             | 181         | t-0    | 0.1770                           | 0.0037       | 1.811                            | 0.052        | 0.0742                            | 0.0014       | 0.74        | 1051                             | 20           | 1049         | 19                               | 1046         | 39                                | 0.00         | 100.4                    |                          |
| 64a                                                    | 35                             | 186         | t-0    | 0.1934                           | 0.0040       | 2.082                            | 0.065        | 0.0781                            | 0.0018       | 0.67        | 1140                             | 22           | 1143         | 21                               | 1148         | 46                                | 0.28         | 99.3                     |                          |
| 64b                                                    | 35                             | 275         | t-0    | 0.1777                           | 0.0033       | 1.825                            | 0.053        | 0.0745                            | 0.0017       | 0.64        | 1054                             | 18           | 1055         | 19                               | 1055         | 45                                | 0.03         | 99.9                     |                          |
| 65                                                     | 35                             | 209         | t-0    | 0.2332                           | 0.0032       | 2.781                            | 0.070        | 0.0865                            | 0.0018       | 0.55        | 1351                             | 17           | 1350         | 19                               | 1349         | 40                                | 0.00         | 100.1                    |                          |
| 66                                                     | 35                             | 143         | t-0    | 0.1977                           | 0.0025       | 2.150                            | 0.053        | 0.0789                            | 0.0016       | 0.52        | 1163                             | 14           | 1165         | 17                               | 1169         | 41                                | 0.02         | 99.5                     |                          |
| 67                                                     | 35                             | 79          | t-0    | 0.1829                           | 0.0030       | 1.902                            | 0.053        | 0.0754                            | 0.0017       | 0.59        | 1083                             | 16           | 1082         | 18                               | 1080         | 45                                | 0.13         | 100.3                    |                          |

\* Internally-unstandardized estimates based on count rates of 238 only.

† Color of grains (b = brown, y,t = yellow-transparent, t = transparent, p = pink) and appearance in CL (0 = distinct, 1 = cloudy/patchy).

‡ Uncertainties are absolute internal 2 s.d.

$\rho^{\S}$  Correlation coefficient between errors on  $^{207}\text{Pb}/^{235}\text{U}$  and  $^{206}\text{Pb}/^{238}\text{U}$ .

$\uparrow$  Calculated using IsoPlot v. 3.72 (Ludwig, 2009) and applying the U-decay constant after Steiger and Jäger (1977).

<sup>1</sup>  $(^{206}\text{Pb}/^{204}\text{Pb})_{\text{common}} / (^{206}\text{Pb}/^{204}\text{Pb})_{\text{sample}}$ .

<sup>2</sup>  $100 * (^{206}\text{Pb}/^{238}\text{U age}) / (^{207}\text{Pb}/^{206}\text{Pb age})$ .

**Appendix B:** U-Pb isotope data and –ages from the LA-ICP-MS analysis of zircon (sample 10017).

| Analysis                                               | Spot size<br>[ $\mu\text{m}$ ] | U*<br>[ppm] | Color† | Ratios‡                          |              | $^{207}\text{Pb}/^{235}\text{U}$ |              | $^{207}\text{Pb}/^{206}\text{Pb}$ |              | $\rho^{\S}$ | Ages [Ma]                        |              | $^{207}\text{Pb}/^{235}\text{U}$ |              | $^{207}\text{Pb}/^{206}\text{Pb}$ |              | $f^{206\%1}$ | Concordance <sup>2</sup> |  |
|--------------------------------------------------------|--------------------------------|-------------|--------|----------------------------------|--------------|----------------------------------|--------------|-----------------------------------|--------------|-------------|----------------------------------|--------------|----------------------------------|--------------|-----------------------------------|--------------|--------------|--------------------------|--|
|                                                        |                                |             |        | $^{206}\text{Pb}/^{238}\text{U}$ | $\pm 2$ s.d. | $^{207}\text{Pb}/^{235}\text{U}$ | $\pm 2$ s.d. | $^{207}\text{Pb}/^{206}\text{Pb}$ | $\pm 2$ s.d. |             | $^{206}\text{Pb}/^{238}\text{U}$ | $\pm 2$ s.d. | $^{207}\text{Pb}/^{235}\text{U}$ | $\pm 2$ s.d. | $^{207}\text{Pb}/^{206}\text{Pb}$ | $\pm 2$ s.d. |              |                          |  |
| <b>Size fraction: &gt;400 <math>\mu\text{m}</math></b> |                                |             |        |                                  |              |                                  |              |                                   |              |             |                                  |              |                                  |              |                                   |              |              |                          |  |
| 01a                                                    | 35                             | 970         | b-1    | 0.0904                           | 0.0027       | 0.789                            | 0.048        | 0.0632                            | 0.0033       | 0.50        | 558                              | 16           | 590                              | 27           | 716                               | 112          | 1.48         | 77.9                     |  |
| 01b                                                    | 35                             | 31          | b-0    | 0.1255                           | 0.0046       | 1.258                            | 0.071        | 0.0727                            | 0.0031       | 0.64        | 762                              | 26           | 827                              | 32           | 1007                              | 88           | 0.39         | 75.7                     |  |
| 03a                                                    | 35                             | 61          | y,t-0  | 0.1519                           | 0.0036       | 1.456                            | 0.046        | 0.0695                            | 0.0014       | 0.75        | 911                              | 20           | 912                              | 19           | 914                               | 43           | 0.00         | 99.7                     |  |
| 03b                                                    | 35                             | 26          | y,t-0  | 0.1751                           | 0.0048       | 1.784                            | 0.067        | 0.0739                            | 0.0019       | 0.73        | 1040                             | 26           | 1040                             | 24           | 1038                              | 52           | 0.54         | 100.2                    |  |
| <b>Size fraction: 300-400 <math>\mu\text{m}</math></b> |                                |             |        |                                  |              |                                  |              |                                   |              |             |                                  |              |                                  |              |                                   |              |              |                          |  |
| 04a                                                    | 35                             | 1492        | b-1    | 0.1760                           | 0.0049       | 1.799                            | 0.070        | 0.0741                            | 0.0020       | 0.72        | 1045                             | 27           | 1045                             | 25           | 1045                              | 55           | 0.03         | 100.0                    |  |
| 04b                                                    | 35                             | 907         | b-1    | 0.1889                           | 0.0034       | 1.991                            | 0.063        | 0.0765                            | 0.0020       | 0.56        | 1115                             | 18           | 1113                             | 22           | 1107                              | 53           | 0.03         | 100.8                    |  |
| 05                                                     | 35                             | 437         | b-1    | 0.3263                           | 0.0083       | 5.007                            | 0.189        | 0.1113                            | 0.0031       | 0.67        | 1820                             | 40           | 1821                             | 32           | 1821                              | 51           | 0.00         | 100.0                    |  |
| 06                                                     | 35                             | 1781        | b-1    | 0.1629                           | 0.0033       | 1.601                            | 0.045        | 0.0713                            | 0.0014       | 0.71        | 973                              | 18           | 971                              | 18           | 966                               | 41           | 0.01         | 100.7                    |  |
| 07                                                     | 35                             | 1739        | b-1    | 0.1722                           | 0.0045       | 1.703                            | 0.061        | 0.0717                            | 0.0017       | 0.73        | 1024                             | 25           | 1010                             | 23           | 978                               | 50           | 0.01         | 104.8                    |  |
| 08a                                                    | 35                             | 311         | b-1    | 0.4201                           | 0.0097       | 12.165                           | 0.418        | 0.2100                            | 0.0053       | 0.68        | 2261                             | 44           | 2617                             | 32           | 2906                              | 41           | 0.05         | 77.8                     |  |
| 08b                                                    | 25                             | 104         | b-1    | 0.5746                           | 0.0156       | 16.941                           | 0.814        | 0.2138                            | 0.0085       | 0.56        | 2927                             | 64           | 2932                             | 46           | 2935                              | 64           | 0.15         | 99.7                     |  |
| 09                                                     | 35                             | 1113        | b-1    | 0.1749                           | 0.0054       | 1.790                            | 0.072        | 0.0742                            | 0.0019       | 0.77        | 1039                             | 30           | 1042                             | 26           | 1047                              | 52           | 0.01         | 99.2                     |  |
| 10                                                     | 35                             | 1989        | b-1    | 0.1111                           | 0.0031       | 1.008                            | 0.040        | 0.0658                            | 0.0018       | 0.70        | 679                              | 18           | 708                              | 20           | 800                               | 59           | 0.24         | 84.9                     |  |
| 11                                                     | 35                             | 381         | b-1    | 0.1672                           | 0.0053       | 1.671                            | 0.062        | 0.0725                            | 0.0014       | 0.86        | 996                              | 30           | 998                              | 24           | 1000                              | 38           | 0.04         | 99.6                     |  |
| 12a                                                    | 35                             | 1178        | b-1    | 0.1671                           | 0.0038       | 1.678                            | 0.050        | 0.0728                            | 0.0014       | 0.77        | 996                              | 21           | 1000                             | 19           | 1010                              | 38           | 0.20         | 98.7                     |  |
| 12b                                                    | 35                             | 513         | b-1    | 0.1671                           | 0.0031       | 1.684                            | 0.043        | 0.0731                            | 0.0013       | 0.73        | 996                              | 17           | 1003                             | 16           | 1017                              | 35           | 0.00         | 97.9                     |  |
| 13                                                     | 35                             | 1210        | b-1    | 0.1937                           | 0.0038       | 2.049                            | 0.054        | 0.0767                            | 0.0013       | 0.76        | 1141                             | 21           | 1132                             | 18           | 1114                              | 34           | 0.00         | 102.4                    |  |
| 14a                                                    | 35                             | 518         | y,t-0  | 0.2358                           | 0.0055       | 2.826                            | 0.099        | 0.0869                            | 0.0023       | 0.67        | 1365                             | 29           | 1362                             | 26           | 1359                              | 50           | 0.05         | 100.4                    |  |
| 14b                                                    | 35                             | 558         | y,t-0  | 0.2251                           | 0.0053       | 2.622                            | 0.082        | 0.0845                            | 0.0017       | 0.75        | 1309                             | 28           | 1307                             | 23           | 1304                              | 40           | 0.02         | 100.4                    |  |
| 15                                                     | 35                             | 236         | y,t-0  | 0.1655                           | 0.0036       | 1.648                            | 0.060        | 0.0722                            | 0.0021       | 0.59        | 987                              | 20           | 989                              | 23           | 993                               | 60           | 0.03         | 99.4                     |  |
| 16                                                     | 35                             | 47          | y,t-0  | 0.2070                           | 0.0037       | 2.304                            | 0.073        | 0.0807                            | 0.0021       | 0.56        | 1213                             | 20           | 1213                             | 22           | 1214                              | 51           | 0.00         | 99.9                     |  |
| 17                                                     | 35                             | 284         | y,t-0  | 0.1781                           | 0.0034       | 1.827                            | 0.053        | 0.0744                            | 0.0016       | 0.65        | 1057                             | 18           | 1055                             | 19           | 1052                              | 44           | 0.00         | 100.5                    |  |
| 18                                                     | 35                             | 206         | y,t-0  | 0.2974                           | 0.0078       | 4.214                            | 0.145        | 0.1027                            | 0.0023       | 0.76        | 1679                             | 39           | 1677                             | 28           | 1674                              | 42           | 0.01         | 100.3                    |  |
| 19                                                     | 35                             | 73          | y,t-0  | 0.1754                           | 0.0045       | 1.790                            | 0.066        | 0.0740                            | 0.0020       | 0.69        | 1042                             | 24           | 1042                             | 24           | 1042                              | 54           | 0.12         | 99.9                     |  |
| 20                                                     | 35                             | 151         | y,t-0  | 0.5340                           | 0.0142       | 13.909                           | 0.479        | 0.1889                            | 0.0041       | 0.77        | 2758                             | 60           | 2744                             | 33           | 2733                              | 36           | 0.00         | 100.9                    |  |
| 21                                                     | 35                             | 490         | y,t-1  | 0.1590                           | 0.0040       | 1.572                            | 0.052        | 0.0717                            | 0.0016       | 0.76        | 951                              | 22           | 959                              | 21           | 978                               | 44           | 0.00         | 97.3                     |  |
| 22                                                     | 35                             | 58          | y,t-0  | 0.2184                           | 0.0068       | 2.499                            | 0.090        | 0.0830                            | 0.0015       | 0.86        | 1273                             | 36           | 1272                             | 26           | 1269                              | 36           | 0.07         | 100.3                    |  |
| 23                                                     | 35                             | 37          | y,t-0  | 0.1988                           | 0.0058       | 2.150                            | 0.080        | 0.0784                            | 0.0018       | 0.79        | 1169                             | 31           | 1165                             | 26           | 1158                              | 45           | 0.00         | 101.0                    |  |
| 24                                                     | 35                             | 136         | y,t-0  | 0.3224                           | 0.0083       | 4.849                            | 0.146        | 0.1091                            | 0.0017       | 0.85        | 1802                             | 40           | 1794                             | 25           | 1784                              | 29           | 0.06         | 101.0                    |  |
| 25                                                     | 35                             | 26          | y,t-0  | 0.1808                           | 0.0045       | 1.870                            | 0.063        | 0.0750                            | 0.0017       | 0.75        | 1071                             | 25           | 1071                             | 22           | 1069                              | 45           | 0.00         | 100.2                    |  |
| 26a                                                    | 35                             | 135         | y,t-0  | 0.1827                           | 0.0042       | 1.897                            | 0.051        | 0.0753                            | 0.0011       | 0.86        | 1082                             | 23           | 1080                             | 18           | 1077                              | 28           | 0.00         | 100.4                    |  |
| 26b                                                    | 35                             | 22          | y,t-0  | 0.1762                           | 0.0034       | 1.816                            | 0.055        | 0.0747                            | 0.0017       | 0.64        | 1046                             | 19           | 1051                             | 20           | 1061                              | 47           | 0.00         | 98.6                     |  |

\* Internally-unstandardized estimates based on count rates of 238 only.

† Color of grains (b = brown, y,t = yellow-transparent, t = transparent, p = pink) and appearance in CL (0 = distinct, 1 = cloudy/patchy).

‡ Uncertainties are absolute internal 2 s.d.

$\rho^{\S}$  Correlation coefficient between errors on  $^{207}\text{Pb}/^{235}\text{U}$  and  $^{206}\text{Pb}/^{238}\text{U}$ .

$\S$  Calculated using IsoPlot v. 3.72 (Ludwig, 2009) and applying the U-decay constant after Steiger and Jäger (1977).

<sup>1</sup>  $(^{206}\text{Pb}/^{204}\text{Pb})_{\text{common}} / (^{206}\text{Pb}/^{204}\text{Pb})_{\text{sample}}$ .

<sup>2</sup>  $100 * (^{206}\text{Pb}/^{238}\text{U age}) / (^{207}\text{Pb}/^{206}\text{Pb age})$ .

**Appendix B:** U-Pb isotope data and –ages from the LA-ICP-MS analysis of zircon (sample 10017).

| Analysis                         | Spot size<br>[μm] | U*<br>[ppm] | Color† | Ratios‡                             |         | <sup>207</sup> Pb/ <sup>235</sup> U |         | <sup>207</sup> Pb/ <sup>206</sup> Pb |         | ρ <sup>§</sup> | Ages [Ma]                           |         | <sup>207</sup> Pb/ <sup>235</sup> U |         | <sup>207</sup> Pb/ <sup>206</sup> Pb |         | f <sup>206</sup> % <sup>¶</sup> | Concordance <sup>‡</sup> |  |
|----------------------------------|-------------------|-------------|--------|-------------------------------------|---------|-------------------------------------|---------|--------------------------------------|---------|----------------|-------------------------------------|---------|-------------------------------------|---------|--------------------------------------|---------|---------------------------------|--------------------------|--|
|                                  |                   |             |        | <sup>206</sup> Pb/ <sup>238</sup> U | ±2 s.d. |                                     | ±2 s.d. |                                      | ±2 s.d. |                | <sup>206</sup> Pb/ <sup>238</sup> U | ±2 s.d. |                                     | ±2 s.d. |                                      | ±2 s.d. |                                 |                          |  |
| <i>Size fraction: 300-400 μm</i> |                   |             |        |                                     |         |                                     |         |                                      |         |                |                                     |         |                                     |         |                                      |         |                                 |                          |  |
| 27                               | 35                | 46          | y,t-0  | 0.2019                              | 0.0056  | 2.204                               | 0.082   | 0.0792                               | 0.0020  | 0.74           | 1186                                | 30      | 1182                                | 26      | 1176                                 | 49      | 0.00                            | 100.8                    |  |
| 28                               | 35                | 468         | y,t-0  | 0.3246                              | 0.0089  | 4.999                               | 0.160   | 0.1117                               | 0.0018  | 0.86           | 1812                                | 43      | 1819                                | 27      | 1827                                 | 30      | 0.00                            | 99.2                     |  |
| 29a                              | 35                | 342         | y,t-0  | 0.1794                              | 0.0038  | 1.841                               | 0.047   | 0.0744                               | 0.0010  | 0.84           | 1064                                | 21      | 1060                                | 17      | 1053                                 | 28      | 0.00                            | 101.0                    |  |
| 29b                              | 35                | 28          | y,t-0  | 0.1846                              | 0.0055  | 1.927                               | 0.075   | 0.0757                               | 0.0019  | 0.77           | 1092                                | 30      | 1090                                | 26      | 1087                                 | 50      | 0.11                            | 100.4                    |  |
| 30                               | 35                | 40          | y,t-0  | 0.1881                              | 0.0057  | 1.985                               | 0.084   | 0.0765                               | 0.0023  | 0.71           | 1111                                | 31      | 1110                                | 28      | 1109                                 | 59      | 0.00                            | 100.1                    |  |
| 31                               | 35                | 713         | y,t-1  | 0.1987                              | 0.0052  | 2.139                               | 0.066   | 0.0780                               | 0.0013  | 0.85           | 1169                                | 28      | 1161                                | 21      | 1148                                 | 32      | 0.00                            | 101.8                    |  |
| 32                               | 35                | 16          | y,t-0  | 0.1817                              | 0.0048  | 1.893                               | 0.090   | 0.0756                               | 0.0030  | 0.56           | 1076                                | 26      | 1079                                | 32      | 1084                                 | 80      | 0.00                            | 99.3                     |  |
| 33                               | 35                | 16          | y,t-0  | 0.0974                              | 0.0055  | 0.795                               | 0.072   | 0.0592                               | 0.0042  | 0.62           | 599                                 | 32      | 594                                 | 41      | 575                                  | 155     | 1.10                            | 104.2                    |  |
| 34                               | 35                | 24          | y,t-0  | 0.1837                              | 0.0043  | 1.926                               | 0.071   | 0.0761                               | 0.0022  | 0.63           | 1087                                | 23      | 1090                                | 25      | 1096                                 | 57      | 0.09                            | 99.1                     |  |
| 35                               | 35                | 469         | y,t-0  | 0.1763                              | 0.0046  | 1.784                               | 0.064   | 0.0734                               | 0.0018  | 0.73           | 1047                                | 25      | 1040                                | 23      | 1025                                 | 50      | 0.01                            | 102.1                    |  |
| 36a                              | 35                | 210         | y,t-0  | 0.1760                              | 0.0038  | 1.787                               | 0.071   | 0.0737                               | 0.0024  | 0.55           | 1045                                | 21      | 1041                                | 26      | 1032                                 | 67      | 0.03                            | 101.2                    |  |
| 36b                              | 35                | 198         | y,t-0  | 0.2086                              | 0.0071  | 2.319                               | 0.106   | 0.0806                               | 0.0025  | 0.75           | 1221                                | 38      | 1218                                | 32      | 1212                                 | 60      | 0.00                            | 100.8                    |  |
| <i>Size fraction: 200-300 μm</i> |                   |             |        |                                     |         |                                     |         |                                      |         |                |                                     |         |                                     |         |                                      |         |                                 |                          |  |
| 37a                              | 35                | 931         | b-1    | 0.1755                              | 0.0044  | 1.795                               | 0.063   | 0.0742                               | 0.0018  | 0.73           | 1042                                | 24      | 1044                                | 23      | 1047                                 | 48      | 0.08                            | 99.5                     |  |
| 37b                              | 35                | 152         | b-1    | 0.1804                              | 0.0080  | 1.862                               | 0.099   | 0.0749                               | 0.0022  | 0.84           | 1069                                | 44      | 1068                                | 35      | 1065                                 | 58      | 0.13                            | 100.4                    |  |
| 37c                              | 25                | 1704        | b-1    | 0.1102                              | 0.0033  | 0.993                               | 0.039   | 0.0654                               | 0.0017  | 0.76           | 674                                 | 19      | 700                                 | 20      | 786                                  | 54      | 0.05                            | 85.7                     |  |
| 38a                              | 25                | 1139        | b-1    | 0.1452                              | 0.0068  | 2.105                               | 0.113   | 0.1051                               | 0.0028  | 0.87           | 874                                 | 38      | 1150                                | 37      | 1717                                 | 48      | 0.18                            | 50.9                     |  |
| 38b                              | 25                | 707         | b-1    | 0.1812                              | 0.0068  | 3.294                               | 0.144   | 0.1319                               | 0.0030  | 0.85           | 1073                                | 37      | 1480                                | 34      | 2123                                 | 40      | 0.05                            | 50.6                     |  |
| 39a                              | 35                | 1007        | b-1    | 0.2133                              | 0.0099  | 2.416                               | 0.126   | 0.0822                               | 0.0019  | 0.89           | 1246                                | 53      | 1248                                | 37      | 1250                                 | 46      | 0.04                            | 99.7                     |  |
| 39b                              | 35                | 443         | b-1    | 0.2146                              | 0.0064  | 2.434                               | 0.082   | 0.0823                               | 0.0013  | 0.89           | 1253                                | 34      | 1253                                | 24      | 1252                                 | 30      | 0.04                            | 100.1                    |  |
| 40a                              | 35                | 988         | b-1    | 0.1220                              | 0.0042  | 1.144                               | 0.043   | 0.0680                               | 0.0011  | 0.90           | 742                                 | 24      | 774                                 | 21      | 867                                  | 35      | 0.10                            | 85.6                     |  |
| 40b                              | 35                | 242         | b-1    | 0.1671                              | 0.0043  | 1.672                               | 0.050   | 0.0726                               | 0.0011  | 0.86           | 996                                 | 24      | 998                                 | 19      | 1003                                 | 31      | 0.11                            | 99.3                     |  |
| 41a                              | 35                | 738         | b-1    | 0.1717                              | 0.0065  | 1.730                               | 0.072   | 0.0731                               | 0.0013  | 0.91           | 1021                                | 36      | 1020                                | 27      | 1016                                 | 35      | 0.05                            | 100.5                    |  |
| 41b                              | 35                | 1320        | b-1    | 0.1197                              | 0.0045  | 1.102                               | 0.046   | 0.0667                               | 0.0012  | 0.90           | 729                                 | 26      | 754                                 | 22      | 830                                  | 37      | 0.18                            | 87.8                     |  |
| 42a                              | 35                | 227         | b-0    | 0.2254                              | 0.0059  | 2.671                               | 0.079   | 0.0859                               | 0.0012  | 0.89           | 1310                                | 31      | 1320                                | 22      | 1337                                 | 26      | 0.00                            | 98.0                     |  |
| 42b                              | 12                | 135         | b-0    | 0.1951                              | 0.0177  | 2.109                               | 0.229   | 0.0784                               | 0.0047  | 0.84           | 1149                                | 96      | 1152                                | 75      | 1158                                 | 118     | 0.00                            | 99.2                     |  |
| 43a                              | 35                | 563         | b-0    | 0.2180                              | 0.0054  | 2.489                               | 0.075   | 0.0828                               | 0.0015  | 0.82           | 1271                                | 28      | 1269                                | 22      | 1265                                 | 34      | 0.00                            | 100.5                    |  |
| 43b                              | 35                | 389         | b-0    | 0.2172                              | 0.0073  | 2.515                               | 0.100   | 0.0840                               | 0.0018  | 0.85           | 1267                                | 39      | 1276                                | 29      | 1292                                 | 41      | 0.08                            | 98.1                     |  |
| 44a                              | 35                | 261         | b-0    | 0.5005                              | 0.0122  | 12.226                              | 0.350   | 0.1772                               | 0.0027  | 0.85           | 2616                                | 52      | 2622                                | 27      | 2627                                 | 25      | 0.01                            | 99.6                     |  |
| 44b                              | 25                | 96          | b-0    | 0.5014                              | 0.0178  | 12.299                              | 0.493   | 0.1779                               | 0.0033  | 0.89           | 2620                                | 76      | 2627                                | 38      | 2634                                 | 31      | 0.00                            | 99.5                     |  |
| 45a                              | 35                | 475         | b-1    | 0.2472                              | 0.0085  | 5.591                               | 0.227   | 0.1641                               | 0.0036  | 0.85           | 1424                                | 44      | 1915                                | 35      | 2498                                 | 36      | 1.09                            | 57.0                     |  |
| 45b                              | 25                | 134         | b-1    | 0.5072                              | 0.0193  | 12.677                              | 0.580   | 0.1813                               | 0.0046  | 0.83           | 2645                                | 82      | 2656                                | 43      | 2665                                 | 42      | 0.12                            | 99.2                     |  |
| 46a                              | 35                | 711         | b-1    | 0.2914                              | 0.0080  | 6.280                               | 0.237   | 0.1563                               | 0.0041  | 0.73           | 1649                                | 40      | 2016                                | 33      | 2416                                 | 44      | 0.08                            | 68.2                     |  |

\* Internally-unstandardized estimates based on count rates of <sup>238</sup>U only.

† Color of grains (b = brown, y,t = yellow-transparent, t = transparent, p = pink) and appearance in CL (0 = distinct, 1 = cloudy/patchy).

‡ Uncertainties are absolute internal 2 s.d.

§ Correlation coefficient between errors on <sup>207</sup>Pb/<sup>235</sup>U and <sup>206</sup>Pb/<sup>238</sup>U.

¶ Calculated using IsoPlot v. 3.72 (Ludwig, 2009) and applying the U-decay constant after Steiger and Jäger (1977).

<sup>1</sup> (<sup>206</sup>Pb/<sup>204</sup>Pb)<sub>common</sub> / (<sup>206</sup>Pb/<sup>204</sup>Pb)<sub>sample</sub>.

<sup>2</sup> 100 \* (<sup>206</sup>Pb/<sup>238</sup>U age) / (<sup>207</sup>Pb/<sup>206</sup>Pb age).

**Appendix B:** U-Pb isotope data and –ages from the LA-ICP-MS analysis of zircon (sample 10017).

| Analysis                         | Spot size<br>[μm] | U*<br>[ppm] | Color† | Ratios‡                             |         | <sup>207</sup> Pb/ <sup>235</sup> U |         | <sup>207</sup> Pb/ <sup>206</sup> Pb |         | ρ <sup>§</sup> | Ages [Ma]                           |         | <sup>207</sup> Pb/ <sup>235</sup> U |         | <sup>207</sup> Pb/ <sup>206</sup> Pb |         | f <sup>206</sup> % <sup>1</sup> | Concordance <sup>2</sup> |  |
|----------------------------------|-------------------|-------------|--------|-------------------------------------|---------|-------------------------------------|---------|--------------------------------------|---------|----------------|-------------------------------------|---------|-------------------------------------|---------|--------------------------------------|---------|---------------------------------|--------------------------|--|
|                                  |                   |             |        | <sup>206</sup> Pb/ <sup>238</sup> U | ±2 s.d. |                                     | ±2 s.d. |                                      | ±2 s.d. |                | <sup>206</sup> Pb/ <sup>238</sup> U | ±2 s.d. |                                     | ±2 s.d. |                                      | ±2 s.d. |                                 |                          |  |
| <b>Size fraction: 200-300 μm</b> |                   |             |        |                                     |         |                                     |         |                                      |         |                |                                     |         |                                     |         |                                      |         |                                 |                          |  |
| 46b                              | 12                | 80          | b-1    | 0.2583                              | 0.0165  | 4.030                               | 0.320   | 0.1132                               | 0.0053  | 0.80           | 1481                                | 84      | 1640                                | 65      | 1851                                 | 85      | 0.25                            | 80.0                     |  |
| 47a                              | 35                | 140         | b-1    | 0.1919                              | 0.0069  | 2.338                               | 0.097   | 0.0884                               | 0.0019  | 0.86           | 1131                                | 37      | 1224                                | 30      | 1391                                 | 40      | 0.04                            | 81.3                     |  |
| 47b                              | 35                | 309         | b-1    | 0.2352                              | 0.0059  | 2.825                               | 0.090   | 0.0871                               | 0.0017  | 0.79           | 1361                                | 31      | 1362                                | 24      | 1363                                 | 38      | 0.05                            | 99.9                     |  |
| 48a                              | 35                | 351         | b-1    | 0.3220                              | 0.0057  | 4.870                               | 0.118   | 0.1097                               | 0.0018  | 0.73           | 1800                                | 28      | 1797                                | 20      | 1794                                 | 30      | 0.02                            | 100.3                    |  |
| 48b                              | 25                | 96          | b-1    | 0.3020                              | 0.0167  | 4.463                               | 0.333   | 0.1072                               | 0.0054  | 0.74           | 1701                                | 83      | 1724                                | 62      | 1753                                 | 92      | 0.00                            | 97.1                     |  |
| 49a                              | 35                | 1077        | b-0    | 0.1711                              | 0.0033  | 1.735                               | 0.044   | 0.0735                               | 0.0012  | 0.75           | 1018                                | 18      | 1021                                | 16      | 1029                                 | 34      | 0.00                            | 99.0                     |  |
| 49b                              | 25                | 1299        | b-0    | 0.1721                              | 0.0034  | 1.732                               | 0.048   | 0.0730                               | 0.0014  | 0.73           | 1024                                | 19      | 1021                                | 18      | 1013                                 | 38      | 0.00                            | 101.0                    |  |
| 50                               | 35                | 81          | y,t-0  | 0.1765                              | 0.0040  | 1.811                               | 0.070   | 0.0744                               | 0.0023  | 0.59           | 1048                                | 22      | 1049                                | 25      | 1052                                 | 63      | 0.00                            | 99.6                     |  |
| 51a                              | 35                | 705         | y,t-1  | 0.3967                              | 0.0077  | 7.371                               | 0.215   | 0.1348                               | 0.0029  | 0.66           | 2154                                | 35      | 2157                                | 26      | 2161                                 | 38      | 0.04                            | 99.7                     |  |
| 51b                              | 25                | 181         | y,t-0  | 0.0925                              | 0.0032  | 0.815                               | 0.036   | 0.0639                               | 0.0018  | 0.77           | 570                                 | 19      | 605                                 | 20      | 740                                  | 60      | 0.00                            | 77.1                     |  |
| 52a                              | 35                | 230         | y,t-0  | 0.3260                              | 0.0063  | 4.958                               | 0.134   | 0.1103                               | 0.0021  | 0.72           | 1819                                | 31      | 1812                                | 23      | 1804                                 | 34      | 0.01                            | 100.8                    |  |
| 52b                              | 35                | 139         | y,t-0  | 0.3237                              | 0.0056  | 4.903                               | 0.112   | 0.1099                               | 0.0016  | 0.76           | 1808                                | 27      | 1803                                | 19      | 1797                                 | 27      | 0.04                            | 100.6                    |  |
| 53a                              | 35                | 85          | y,t-0  | 0.2126                              | 0.0049  | 2.379                               | 0.080   | 0.0812                               | 0.0020  | 0.68           | 1242                                | 26      | 1236                                | 24      | 1225                                 | 48      | 0.12                            | 101.4                    |  |
| 53b                              | 35                | 34          | y,t-0  | 0.1992                              | 0.0058  | 2.166                               | 0.079   | 0.0789                               | 0.0018  | 0.80           | 1171                                | 31      | 1170                                | 25      | 1169                                 | 44      | 0.00                            | 100.2                    |  |
| 54a                              | 35                | 71          | y,t-0  | 0.1963                              | 0.0039  | 2.119                               | 0.052   | 0.0783                               | 0.0011  | 0.81           | 1156                                | 21      | 1155                                | 17      | 1154                                 | 28      | 0.00                            | 100.2                    |  |
| 54b                              | 35                | 89          | y,t-0  | 0.1836                              | 0.0032  | 1.924                               | 0.044   | 0.0760                               | 0.0011  | 0.76           | 1087                                | 17      | 1090                                | 15      | 1095                                 | 30      | 0.06                            | 99.2                     |  |
| 55a                              | 35                | 120         | y,t-0  | 0.2205                              | 0.0053  | 2.540                               | 0.079   | 0.0835                               | 0.0017  | 0.77           | 1285                                | 28      | 1284                                | 23      | 1282                                 | 39      | 0.00                            | 100.2                    |  |
| 55b                              | 35                | 348         | y,t-0  | 0.1955                              | 0.0041  | 2.095                               | 0.060   | 0.0777                               | 0.0015  | 0.73           | 1151                                | 22      | 1147                                | 20      | 1140                                 | 39      | 0.00                            | 100.9                    |  |
| 56a                              | 35                | 236         | y,t-0  | 0.1780                              | 0.0056  | 1.824                               | 0.071   | 0.0743                               | 0.0017  | 0.82           | 1056                                | 31      | 1054                                | 25      | 1050                                 | 45      | 0.00                            | 100.5                    |  |
| 56b                              | 35                | 50          | y,t-0  | 0.1769                              | 0.0048  | 1.816                               | 0.066   | 0.0744                               | 0.0018  | 0.75           | 1050                                | 26      | 1051                                | 24      | 1054                                 | 48      | 0.13                            | 99.7                     |  |
| 57a                              | 35                | 320         | y,t-0  | 0.3271                              | 0.0063  | 4.976                               | 0.117   | 0.1103                               | 0.0015  | 0.82           | 1824                                | 31      | 1815                                | 20      | 1805                                 | 24      | 0.00                            | 101.1                    |  |
| 57b                              | 35                | 159         | y,t-0  | 0.3131                              | 0.0108  | 4.654                               | 0.190   | 0.1078                               | 0.0024  | 0.84           | 1756                                | 53      | 1759                                | 34      | 1763                                 | 40      | 0.12                            | 99.6                     |  |
| 58a                              | 35                | 516         | y,t-1  | 0.2354                              | 0.0052  | 2.813                               | 0.079   | 0.0867                               | 0.0015  | 0.79           | 1363                                | 27      | 1359                                | 21      | 1353                                 | 33      | 0.01                            | 100.7                    |  |
| 58b                              | 12                | 143         | y,t-0  | 0.0735                              | 0.0070  | 0.568                               | 0.087   | 0.0560                               | 0.0068  | 0.62           | 457                                 | 42      | 457                                 | 57      | 453                                  | 271     | 2.56                            | 100.9                    |  |
| 59a                              | 35                | 191         | y,t-0  | 0.2517                              | 0.0046  | 3.152                               | 0.087   | 0.0908                               | 0.0019  | 0.66           | 1447                                | 24      | 1445                                | 21      | 1443                                 | 40      | 0.08                            | 100.3                    |  |
| 59b                              | 35                | 200         | y,t-0  | 0.2519                              | 0.0051  | 3.143                               | 0.086   | 0.0905                               | 0.0016  | 0.75           | 1448                                | 26      | 1443                                | 21      | 1437                                 | 34      | 0.01                            | 100.8                    |  |
| 60a                              | 35                | 106         | y,t-0  | 0.1655                              | 0.0050  | 1.643                               | 0.071   | 0.0720                               | 0.0022  | 0.71           | 987                                 | 28      | 987                                 | 27      | 986                                  | 62      | 0.28                            | 100.1                    |  |
| 60b                              | 35                | 167         | y,t-0  | 0.1651                              | 0.0039  | 1.646                               | 0.051   | 0.0723                               | 0.0014  | 0.77           | 985                                 | 22      | 988                                 | 20      | 994                                  | 41      | 0.03                            | 99.1                     |  |
| 61a                              | 35                | 13          | y,t-0  | 0.5351                              | 0.0111  | 14.280                              | 0.380   | 0.1936                               | 0.0032  | 0.78           | 2763                                | 46      | 2768                                | 25      | 2773                                 | 27      | 0.00                            | 99.6                     |  |
| 61b                              | 35                | 64          | y,t-0  | 0.5124                              | 0.0120  | 13.585                              | 0.373   | 0.1923                               | 0.0027  | 0.85           | 2667                                | 51      | 2721                                | 26      | 2762                                 | 23      | 0.00                            | 96.5                     |  |
| <b>Size fraction: &lt;200 μm</b> |                   |             |        |                                     |         |                                     |         |                                      |         |                |                                     |         |                                     |         |                                      |         |                                 |                          |  |
| 62                               | 12                | 72          | b-0    | 0.3480                              | 0.0181  | 8.128                               | 0.616   | 0.1694                               | 0.0093  | 0.69           | 1925                                | 87      | 2245                                | 69      | 2552                                 | 93      | 0.00                            | 75.4                     |  |
| 63                               | 35                | 211         | b-0    | 0.1440                              | 0.0025  | 1.425                               | 0.036   | 0.0718                               | 0.0013  | 0.68           | 867                                 | 14      | 899                                 | 15      | 979                                  | 38      | 0.07                            | 88.5                     |  |

\* Internally-unstandardized estimates based on count rates of <sup>238</sup>U only.

† Color of grains (b = brown, y,t = yellow-transparent, t = transparent, p = pink) and appearance in CL (0 = distinct, 1 = cloudy/patchy).

‡ Uncertainties are absolute internal 2 s.d.

§ Correlation coefficient between errors on <sup>207</sup>Pb/<sup>235</sup>U and <sup>206</sup>Pb/<sup>238</sup>U.

<sup>1</sup> Calculated using IsoPlot v. 3.72 (Ludwig, 2009) and applying the U-decay constant after Steiger and Jäger (1977).

<sup>2</sup> 100\*(<sup>206</sup>Pb/<sup>204</sup>Pb)<sub>common</sub>/(<sup>206</sup>Pb/<sup>204</sup>Pb)<sub>sample</sub>.

<sup>3</sup> 100\*(<sup>206</sup>Pb/<sup>238</sup>U age)/(<sup>207</sup>Pb/<sup>206</sup>Pb age).

**Appendix B:** U-Pb isotope data and –ages from the LA-ICP-MS analysis of zircon (sample 10017).

| Analysis                                               | Spot size<br>[ $\mu\text{m}$ ] | U*<br>[ppm] | Color† | Ratios‡ |        | $^{207}\text{Pb}/^{235}\text{U}$ | $\pm 2$ s.d. | $^{207}\text{Pb}/^{206}\text{Pb}$ | $\pm 2$ s.d. | $\rho^{\S}$ | Ages [Ma]<br>$^{206}\text{Pb}/^{238}\text{U}$ | $\pm 2$ s.d. | $^{207}\text{Pb}/^{235}\text{U}$ | $\pm 2$ s.d. | $^{207}\text{Pb}/^{206}\text{Pb}$ | $\pm 2$ s.d. | $f^{206}\%$ <sup>1</sup> | Concordance <sup>2</sup> |
|--------------------------------------------------------|--------------------------------|-------------|--------|---------|--------|----------------------------------|--------------|-----------------------------------|--------------|-------------|-----------------------------------------------|--------------|----------------------------------|--------------|-----------------------------------|--------------|--------------------------|--------------------------|
| <b>Size fraction: &lt;200 <math>\mu\text{m}</math></b> |                                |             |        |         |        |                                  |              |                                   |              |             |                                               |              |                                  |              |                                   |              |                          |                          |
| 64                                                     | 35                             | 95          | y,t-0  | 0.1813  | 0.0033 | 1.871                            | 0.047        | 0.0748                            | 0.0013       | 0.73        | 1074                                          | 18           | 1071                             | 17           | 1064                              | 34           | 0.08                     | 100.9                    |
| 65                                                     | 35                             | 109         | y,t-0  | 0.2022  | 0.0054 | 2.195                            | 0.073        | 0.0787                            | 0.0016       | 0.80        | 1187                                          | 29           | 1180                             | 23           | 1166                              | 39           | 0.00                     | 101.8                    |
| 66                                                     | 35                             | 112         | y,t-0  | 0.2309  | 0.0074 | 2.698                            | 0.117        | 0.0847                            | 0.0025       | 0.74        | 1339                                          | 39           | 1328                             | 32           | 1310                              | 57           | 0.09                     | 102.3                    |
| 67a                                                    | 35                             | 183         | y,t-0  | 0.1845  | 0.0045 | 1.923                            | 0.059        | 0.0756                            | 0.0014       | 0.79        | 1091                                          | 25           | 1089                             | 21           | 1084                              | 38           | 0.09                     | 100.7                    |
| 67b                                                    | 35                             | 214         | y,t-0  | 0.1794  | 0.0049 | 1.883                            | 0.062        | 0.0761                            | 0.0014       | 0.83        | 1064                                          | 27           | 1075                             | 22           | 1098                              | 37           | 0.00                     | 96.9                     |
| 68                                                     | 25                             | 93          | y,t-0  | 0.1658  | 0.0048 | 1.636                            | 0.073        | 0.0716                            | 0.0024       | 0.65        | 989                                           | 26           | 984                              | 28           | 974                               | 69           | 0.00                     | 101.6                    |
| 69                                                     | 35                             | 36          | y,t-0  | 0.1719  | 0.0037 | 1.712                            | 0.060        | 0.0722                            | 0.0020       | 0.61        | 1023                                          | 20           | 1013                             | 23           | 992                               | 57           | 0.40                     | 103.1                    |
| 70                                                     | 25                             | 198         | y,t-0  | 0.2069  | 0.0071 | 2.295                            | 0.103        | 0.0804                            | 0.0023       | 0.77        | 1212                                          | 38           | 1211                             | 32           | 1208                              | 57           | 0.00                     | 100.4                    |

\* Internally-unstandardized estimates based on count rates of 238 only.

† Color of grains (b = brown, y,t = yellow-transparent, t = transparent, p = pink) and appearance in CL (0 = distinct, 1 = cloudy/patchy).

‡ Uncertainties are absolute internal 2 s.d.

$\rho^{\S}$  Correlation coefficient between errors on  $^{207}\text{Pb}/^{235}\text{U}$  and  $^{206}\text{Pb}/^{238}\text{U}$ .

<sup>1</sup> Calculated using IsoPlot v. 3.72 (Ludwig, 2009) and applying the U-decay constant after Steiger and Jäger (1977).

<sup>2</sup>  $100 * (^{206}\text{Pb}/^{238}\text{U})_{\text{common}} / (^{206}\text{Pb}/^{204}\text{Pb})_{\text{sample}}$ .

<sup>2</sup>  $100 * (^{206}\text{Pb}/^{238}\text{U} \text{ age}) / (^{207}\text{Pb}/^{206}\text{Pb} \text{ age})$ .

**Appendix B:** U-Pb isotope data and –ages from the LA-ICP-MS analysis of zircon (sample 12001).

| Analysis                         | Spot size<br>[μm] | U*<br>[ppm] | Color† | Ratios‡                             |          | <sup>207</sup> Pb/ <sup>235</sup> U |          | <sup>207</sup> Pb/ <sup>206</sup> Pb |          | ϕ <sup>§</sup> | Ages [Ma]                           |          | <sup>207</sup> Pb/ <sup>235</sup> U |          | <sup>207</sup> Pb/ <sup>206</sup> Pb |          | f <sup>206</sup> % <sup>1</sup> | Concordance <sup>2</sup> |  |
|----------------------------------|-------------------|-------------|--------|-------------------------------------|----------|-------------------------------------|----------|--------------------------------------|----------|----------------|-------------------------------------|----------|-------------------------------------|----------|--------------------------------------|----------|---------------------------------|--------------------------|--|
|                                  |                   |             |        | <sup>206</sup> Pb/ <sup>238</sup> U | ± 2 s.d. |                                     | ± 2 s.d. |                                      | ± 2 s.d. |                | <sup>206</sup> Pb/ <sup>238</sup> U | ± 2 s.d. |                                     | ± 2 s.d. |                                      | ± 2 s.d. |                                 |                          |  |
| <b>Size fraction: &gt;400 μm</b> |                   |             |        |                                     |          |                                     |          |                                      |          |                |                                     |          |                                     |          |                                      |          |                                 |                          |  |
| 01                               | 35                | 39          | b-0    | 0.2018                              | 0.0065   | 2.219                               | 0.090    | 0.0798                               | 0.0019   | 0.80           | 1185                                | 35       | 1187                                | 28       | 1191                                 | 48       | 0.33                            | 99.4                     |  |
| 02a                              | 35                | 127         | b-0    | 0.1974                              | 0.0037   | 2.133                               | 0.051    | 0.0784                               | 0.0012   | 0.78           | 1161                                | 20       | 1160                                | 16       | 1157                                 | 29       | 0.68                            | 100.4                    |  |
| 02b                              | 35                | 104         | b-0    | 0.2032                              | 0.0050   | 2.231                               | 0.064    | 0.0796                               | 0.0012   | 0.85           | 1193                                | 27       | 1191                                | 20       | 1187                                 | 30       | 0.01                            | 100.5                    |  |
| 02c                              | 35                | 59          | b-0    | 0.2111                              | 0.0061   | 2.396                               | 0.093    | 0.0823                               | 0.0021   | 0.74           | 1235                                | 33       | 1241                                | 28       | 1253                                 | 51       | 0.00                            | 98.6                     |  |
| 03                               | 35                | 16          | b-0    | 0.2013                              | 0.0069   | 2.181                               | 0.112    | 0.0786                               | 0.0030   | 0.67           | 1182                                | 37       | 1175                                | 36       | 1161                                 | 75       | 0.00                            | 101.8                    |  |
| 04                               | 35                | ---         | b-0    | 0.1845                              | 0.0087   | 1.886                               | 0.138    | 0.0741                               | 0.0041   | 0.65           | 1092                                | 48       | 1076                                | 48       | 1045                                 | 112      | 1.75                            | 104.5                    |  |
| 05a                              | 35                | 16          | b-0    | 0.1493                              | 0.0069   | 1.635                               | 0.092    | 0.0794                               | 0.0026   | 0.82           | 897                                 | 39       | 984                                 | 35       | 1182                                 | 64       | 0.00                            | 75.9                     |  |
| 05b                              | 35                | 30          | b-0    | 0.1706                              | 0.0045   | 1.850                               | 0.069    | 0.0787                               | 0.0021   | 0.71           | 1015                                | 25       | 1063                                | 25       | 1164                                 | 52       | 0.94                            | 87.2                     |  |
| 05c                              | 35                | 10          | b-0    | 0.1772                              | 0.0053   | 1.847                               | 0.099    | 0.0756                               | 0.0033   | 0.56           | 1052                                | 29       | 1062                                | 35       | 1084                                 | 89       | 0.00                            | 97.0                     |  |
| 06                               | 35                | 329         | b-0    | 0.1602                              | 0.0034   | 1.592                               | 0.042    | 0.0720                               | 0.0012   | 0.79           | 958                                 | 19       | 967                                 | 17       | 987                                  | 33       | 0.02                            | 97.0                     |  |
| <b>Size fraction: 300-400 μm</b> |                   |             |        |                                     |          |                                     |          |                                      |          |                |                                     |          |                                     |          |                                      |          |                                 |                          |  |
| 07a                              | 35                | 108         | b-0    | 0.5417                              | 0.0129   | 14.398                              | 0.430    | 0.1928                               | 0.0035   | 0.80           | 2790                                | 54       | 2776                                | 28       | 2766                                 | 30       | 0.70                            | 100.9                    |  |
| 07b                              | 35                | 139         | b-0    | 0.2665                              | 0.0061   | 4.133                               | 0.108    | 0.1125                               | 0.0014   | 0.88           | 1523                                | 31       | 1661                                | 21       | 1840                                 | 23       | 0.08                            | 82.8                     |  |
| 08                               | 35                | 39          | b-0    | 0.1798                              | 0.0039   | 1.865                               | 0.069    | 0.0752                               | 0.0023   | 0.58           | 1066                                | 21       | 1069                                | 24       | 1074                                 | 61       | 0.19                            | 99.3                     |  |
| 09a                              | 35                | 49          | b-0    | 0.2959                              | 0.0073   | 4.201                               | 0.132    | 0.1030                               | 0.0020   | 0.78           | 1671                                | 36       | 1674                                | 26       | 1679                                 | 36       | 0.00                            | 99.5                     |  |
| 09b                              | 35                | 169         | b-0    | 0.2903                              | 0.0088   | 4.044                               | 0.138    | 0.1010                               | 0.0016   | 0.89           | 1643                                | 44       | 1643                                | 28       | 1643                                 | 29       | 0.00                            | 100.0                    |  |
| 10a                              | 35                | 129         | b-0    | 0.1951                              | 0.0051   | 2.104                               | 0.070    | 0.0782                               | 0.0016   | 0.78           | 1149                                | 27       | 1150                                | 23       | 1152                                 | 42       | 0.00                            | 99.7                     |  |
| 10b                              | 35                | 17          | b-0    | 0.1887                              | 0.0045   | 1.958                               | 0.113    | 0.0753                               | 0.0040   | 0.41           | 1114                                | 24       | 1101                                | 39       | 1076                                 | 106      | 0.57                            | 103.6                    |  |
| 11a                              | 35                | 36          | b-0    | 0.1842                              | 0.0041   | 1.924                               | 0.059    | 0.0758                               | 0.0016   | 0.72           | 1090                                | 22       | 1090                                | 21       | 1089                                 | 43       | 0.00                            | 100.1                    |  |
| 11b                              | 35                | 49          | b-0    | 0.1821                              | 0.0034   | 1.900                               | 0.058    | 0.0757                               | 0.0018   | 0.62           | 1078                                | 19       | 1081                                | 20       | 1087                                 | 48       | 0.07                            | 99.1                     |  |
| 12                               | 35                | 68          | b-0    | 0.1823                              | 0.0032   | 1.869                               | 0.045    | 0.0743                               | 0.0012   | 0.74           | 1080                                | 18       | 1070                                | 16       | 1051                                 | 33       | 0.17                            | 102.7                    |  |
| 13                               | 35                | 54          | b-0    | 0.1880                              | 0.0050   | 1.967                               | 0.074    | 0.0759                               | 0.0020   | 0.70           | 1110                                | 27       | 1104                                | 25       | 1092                                 | 54       | 0.12                            | 101.6                    |  |
| 14                               | 35                | 60          | b-0    | 0.2916                              | 0.0058   | 4.054                               | 0.105    | 0.1008                               | 0.0017   | 0.77           | 1649                                | 29       | 1645                                | 21       | 1640                                 | 31       | 0.03                            | 100.6                    |  |
| 15                               | 35                | 937         | b-0    | 0.1898                              | 0.0046   | 2.020                               | 0.063    | 0.0772                               | 0.0015   | 0.77           | 1120                                | 25       | 1122                                | 21       | 1126                                 | 40       | 0.05                            | 99.5                     |  |
| 16                               | 35                | 58          | b-0    | 0.3304                              | 0.0105   | 5.176                               | 0.187    | 0.1136                               | 0.0020   | 0.88           | 1840                                | 51       | 1849                                | 31       | 1858                                 | 31       | 0.00                            | 99.1                     |  |
| 17a                              | 35                | 807         | b-0    | 0.2345                              | 0.0045   | 2.736                               | 0.075    | 0.0846                               | 0.0016   | 0.71           | 1358                                | 24       | 1338                                | 20       | 1307                                 | 38       | 0.04                            | 103.9                    |  |
| 17b                              | 25                | 191         | b-0    | 0.2302                              | 0.0160   | 2.699                               | 0.225    | 0.0850                               | 0.0039   | 0.83           | 1335                                | 84       | 1328                                | 62       | 1316                                 | 90       | 0.11                            | 101.4                    |  |
| 18                               | 35                | 105         | b-1    | 0.1833                              | 0.0044   | 1.892                               | 0.063    | 0.0748                               | 0.0017   | 0.72           | 1085                                | 24       | 1078                                | 22       | 1064                                 | 47       | 0.02                            | 101.9                    |  |
| 19                               | 35                | 44          | b-0    | 0.2779                              | 0.0099   | 3.756                               | 0.149    | 0.0980                               | 0.0017   | 0.90           | 1581                                | 50       | 1583                                | 32       | 1587                                 | 33       | 0.00                            | 99.6                     |  |
| 20                               | 35                | 98          | b-0    | 0.1020                              | 0.0032   | 0.851                               | 0.035    | 0.0605                               | 0.0016   | 0.77           | 626                                 | 19       | 625                                 | 19       | 620                                  | 56       | 0.08                            | 101.0                    |  |
| 21                               | 35                | 213         | b-0    | 0.2046                              | 0.0067   | 2.234                               | 0.083    | 0.0792                               | 0.0014   | 0.88           | 1200                                | 36       | 1192                                | 26       | 1177                                 | 34       | 0.00                            | 101.9                    |  |
| 22                               | 35                | 123         | b-0    | 0.3137                              | 0.0103   | 4.582                               | 0.168    | 0.1059                               | 0.0017   | 0.90           | 1759                                | 51       | 1746                                | 31       | 1731                                 | 30       | 0.01                            | 101.6                    |  |
| 23a                              | 35                | 386         | b-1    | 0.4748                              | 0.0175   | 10.782                              | 0.436    | 0.1647                               | 0.0027   | 0.91           | 2505                                | 77       | 2505                                | 38       | 2504                                 | 28       | 0.16                            | 100.0                    |  |

\* Internally-unstandardized estimates based on count rates of 238 only.

† Color of grains (b = brown, y,t = yellow-transparent, t = transparent, p = pink) and appearance in CL (0 = distinct, 1 = cloudy/patchy).

‡ Uncertainties are absolute internal 2 s.d.

§ Correlation coefficient between errors on <sup>207</sup>Pb/<sup>235</sup>U and <sup>206</sup>Pb/<sup>238</sup>U.

¶ Calculated using IsoPlot v. 3.72 (Ludwig, 2009) and applying the U-decay constant after Steiger and Jäger (1977).

<sup>1</sup> (<sup>206</sup>Pb/<sup>204</sup>Pb)<sub>common</sub> / (<sup>206</sup>Pb/<sup>204</sup>Pb)<sub>sample</sub>.

<sup>2</sup> 100 \* (<sup>206</sup>Pb/<sup>238</sup>U age) / (<sup>207</sup>Pb/<sup>206</sup>Pb age).

**Appendix B:** U-Pb isotope data and –ages from the LA-ICP-MS analysis of zircon (sample 12001).

| Analysis                         | Spot size<br>[μm] | U*<br>[ppm] | Color† | Ratios‡                             |         | <sup>207</sup> Pb/ <sup>235</sup> U |         | <sup>207</sup> Pb/ <sup>206</sup> Pb |         | ρ <sup>§</sup> | Ages [Ma]                           |         | <sup>207</sup> Pb/ <sup>235</sup> U |         | <sup>207</sup> Pb/ <sup>206</sup> Pb |         | f <sup>206</sup> % <sup>1</sup> | Concordance <sup>2</sup> |  |
|----------------------------------|-------------------|-------------|--------|-------------------------------------|---------|-------------------------------------|---------|--------------------------------------|---------|----------------|-------------------------------------|---------|-------------------------------------|---------|--------------------------------------|---------|---------------------------------|--------------------------|--|
|                                  |                   |             |        | <sup>206</sup> Pb/ <sup>238</sup> U | ±2 s.d. |                                     | ±2 s.d. |                                      | ±2 s.d. |                | <sup>206</sup> Pb/ <sup>238</sup> U | ±2 s.d. |                                     | ±2 s.d. |                                      | ±2 s.d. |                                 |                          |  |
| <b>Size fraction: 300-400 μm</b> |                   |             |        |                                     |         |                                     |         |                                      |         |                |                                     |         |                                     |         |                                      |         |                                 |                          |  |
| 23b                              | 12                | 278         | b-1    | 0.4682                              | 0.0220  | 10.452                              | 0.557   | 0.1619                               | 0.0041  | 0.88           | 2476                                | 97      | 2476                                | 49      | 2476                                 | 42      | 0.13                            | 100.0                    |  |
| 24                               | 35                | 18          | b-0    | 0.1909                              | 0.0063  | 2.041                               | 0.091   | 0.0776                               | 0.0024  | 0.73           | 1126                                | 34      | 1129                                | 30      | 1136                                 | 60      | 0.00                            | 99.1                     |  |
| 25a                              | 35                | 12          | b-0    | 0.1783                              | 0.0072  | 1.854                               | 0.104   | 0.0754                               | 0.0029  | 0.72           | 1058                                | 39      | 1065                                | 37      | 1080                                 | 78      | 0.49                            | 98.0                     |  |
| 25b                              | 35                | 34          | b-0    | 0.1699                              | 0.0078  | 1.703                               | 0.093   | 0.0727                               | 0.0021  | 0.84           | 1011                                | 43      | 1010                                | 35      | 1006                                 | 59      | 0.10                            | 100.6                    |  |
| <b>Size fraction: 200-300 μm</b> |                   |             |        |                                     |         |                                     |         |                                      |         |                |                                     |         |                                     |         |                                      |         |                                 |                          |  |
| 26a                              | 35                | 584         | b-0    | 0.1870                              | 0.0051  | 1.974                               | 0.067   | 0.0766                               | 0.0016  | 0.80           | 1105                                | 28      | 1107                                | 23      | 1110                                 | 41      | 0.03                            | 99.6                     |  |
| 26b                              | 35                | 1379        | b-0    | 0.1750                              | 0.0033  | 1.786                               | 0.060   | 0.0740                               | 0.0021  | 0.56           | 1040                                | 18      | 1040                                | 22      | 1042                                 | 56      | 0.05                            | 99.8                     |  |
| 27a                              | 35                | 199         | b-0    | 0.4363                              | 0.0168  | 9.091                               | 0.394   | 0.1511                               | 0.0030  | 0.89           | 2334                                | 75      | 2347                                | 40      | 2359                                 | 34      | 0.04                            | 99.0                     |  |
| 27b                              | 25                | 188         | b-0    | 0.3111                              | 0.0143  | 4.569                               | 0.244   | 0.1065                               | 0.0029  | 0.86           | 1746                                | 70      | 1744                                | 44      | 1741                                 | 49      | 0.00                            | 100.3                    |  |
| 28a                              | 35                | 231         | y,t-0  | 0.1828                              | 0.0048  | 1.883                               | 0.084   | 0.0747                               | 0.0027  | 0.59           | 1082                                | 26      | 1075                                | 30      | 1060                                 | 73      | 0.01                            | 102.1                    |  |
| 28b                              | 35                | 434         | y,t-0  | 0.1774                              | 0.0040  | 1.804                               | 0.072   | 0.0738                               | 0.0024  | 0.56           | 1053                                | 22      | 1047                                | 26      | 1035                                 | 67      | 0.00                            | 101.7                    |  |
| 29a                              | 35                | 21          | y,t-0  | 0.1890                              | 0.0059  | 1.997                               | 0.108   | 0.0766                               | 0.0034  | 0.58           | 1116                                | 32      | 1115                                | 37      | 1112                                 | 88      | 0.05                            | 100.4                    |  |
| 29b                              | 35                | 125         | y,t-0  | 0.0949                              | 0.0021  | 0.787                               | 0.032   | 0.0601                               | 0.0021  | 0.54           | 584                                 | 12      | 589                                 | 18      | 608                                  | 75      | 0.18                            | 96.0                     |  |
| 30a                              | 35                | 245         | y,t-0  | 0.1719                              | 0.0045  | 1.766                               | 0.067   | 0.0745                               | 0.0020  | 0.69           | 1023                                | 25      | 1033                                | 25      | 1055                                 | 55      | 0.03                            | 96.9                     |  |
| 30b                              | 35                | 25          | y,t-0  | 0.1868                              | 0.0057  | 1.973                               | 0.111   | 0.0766                               | 0.0036  | 0.54           | 1104                                | 31      | 1106                                | 38      | 1111                                 | 94      | 0.04                            | 99.4                     |  |
| 33a                              | 35                | 63          | y,t-0  | 0.1803                              | 0.0051  | 1.853                               | 0.083   | 0.0745                               | 0.0026  | 0.63           | 1068                                | 28      | 1064                                | 29      | 1056                                 | 70      | 0.37                            | 101.1                    |  |
| 33b                              | 35                | 70          | y,t-0  | 0.1870                              | 0.0058  | 1.959                               | 0.099   | 0.0760                               | 0.0030  | 0.61           | 1105                                | 31      | 1101                                | 34      | 1094                                 | 80      | 0.25                            | 101.0                    |  |
| 34a                              | 35                | 154         | y,t-0  | 0.1859                              | 0.0063  | 1.978                               | 0.093   | 0.0772                               | 0.0025  | 0.72           | 1099                                | 34      | 1108                                | 32      | 1126                                 | 65      | 0.03                            | 97.6                     |  |
| 34b                              | 35                | 10          | y,t-0  | 0.1783                              | 0.0052  | 1.839                               | 0.092   | 0.0748                               | 0.0030  | 0.58           | 1058                                | 29      | 1060                                | 33      | 1064                                 | 82      | 0.06                            | 99.4                     |  |
| 35a                              | 35                | 486         | y,t-0  | 0.1986                              | 0.0049  | 2.141                               | 0.077   | 0.0782                               | 0.0020  | 0.69           | 1168                                | 27      | 1162                                | 25      | 1152                                 | 52      | 0.01                            | 101.4                    |  |
| 35b                              | 35                | 407         | y,t-0  | 0.2062                              | 0.0049  | 2.276                               | 0.080   | 0.0801                               | 0.0021  | 0.67           | 1209                                | 26      | 1205                                | 25      | 1198                                 | 52      | 0.00                            | 100.9                    |  |
| 36a                              | 35                | 24          | y,t-0  | 0.1761                              | 0.0042  | 1.815                               | 0.072   | 0.0747                               | 0.0024  | 0.60           | 1046                                | 23      | 1051                                | 26      | 1062                                 | 64      | 0.00                            | 98.5                     |  |
| 36b                              | 35                | 23          | y,t-0  | 0.1800                              | 0.0046  | 1.870                               | 0.090   | 0.0754                               | 0.0031  | 0.53           | 1067                                | 25      | 1071                                | 32      | 1078                                 | 83      | 0.00                            | 99.0                     |  |
| 37a                              | 35                | 151         | y,t-0  | 0.3113                              | 0.0059  | 4.565                               | 0.127   | 0.1063                               | 0.0022  | 0.68           | 1747                                | 29      | 1743                                | 23      | 1738                                 | 37      | 0.03                            | 100.5                    |  |
| 37b                              | 35                | 113         | y,t-0  | 0.3001                              | 0.0075  | 4.324                               | 0.139   | 0.1045                               | 0.0021  | 0.77           | 1692                                | 37      | 1698                                | 27      | 1706                                 | 38      | 0.19                            | 99.2                     |  |
| 38a                              | 35                | 135         | y,t-0  | 0.1752                              | 0.0041  | 1.776                               | 0.060   | 0.0735                               | 0.0018  | 0.70           | 1041                                | 23      | 1037                                | 22      | 1028                                 | 49      | 0.09                            | 101.2                    |  |
| 38b                              | 35                | 550         | y,t-0  | 0.1659                              | 0.0036  | 1.655                               | 0.051   | 0.0724                               | 0.0016  | 0.70           | 989                                 | 20      | 992                                 | 20      | 997                                  | 45      | 0.03                            | 99.3                     |  |
| 39a                              | 35                | 81          | y,t-0  | 0.1981                              | 0.0063  | 2.166                               | 0.088   | 0.0793                               | 0.0020  | 0.78           | 1165                                | 34      | 1170                                | 28      | 1180                                 | 50      | 0.00                            | 98.7                     |  |
| 39b                              | 25                | 55          | y,t-0  | 0.1752                              | 0.0048  | 1.789                               | 0.072   | 0.0741                               | 0.0022  | 0.68           | 1041                                | 26      | 1042                                | 26      | 1043                                 | 59      | 0.00                            | 99.7                     |  |
| 40a                              | 35                | 98          | y,t-0  | 0.1807                              | 0.0042  | 1.858                               | 0.056   | 0.0746                               | 0.0014  | 0.78           | 1071                                | 23      | 1066                                | 20      | 1058                                 | 38      | 0.07                            | 101.2                    |  |
| 40b                              | 35                | 220         | y,t-0  | 0.1790                              | 0.0042  | 1.854                               | 0.054   | 0.0751                               | 0.0013  | 0.80           | 1062                                | 23      | 1065                                | 19      | 1072                                 | 35      | 0.04                            | 99.1                     |  |
| 41a                              | 35                | 54          | y,t-0  | 0.1809                              | 0.0045  | 1.860                               | 0.066   | 0.0746                               | 0.0018  | 0.71           | 1072                                | 25      | 1067                                | 23      | 1058                                 | 50      | 0.00                            | 101.3                    |  |
| 41b                              | 35                | 121         | y,t-0  | 0.1664                              | 0.0038  | 1.656                               | 0.047   | 0.0722                               | 0.0012  | 0.81           | 992                                 | 21      | 992                                 | 18      | 991                                  | 34      | 0.08                            | 100.1                    |  |

\* Internally-unstandardized estimates based on count rates of <sup>238</sup>U only.

† Color of grains (b = brown, y,t = yellow-transparent, t = transparent, p = pink) and appearance in CL (0 = distinct, 1 = cloudy/patchy).

‡ Uncertainties are absolute internal 2 s.d.

§ Correlation coefficient between errors on <sup>207</sup>Pb/<sup>235</sup>U and <sup>206</sup>Pb/<sup>238</sup>U.

<sup>1</sup> Calculated using IsoPlot v. 3.72 (Ludwig, 2009) and applying the U-decay constant after Steiger and Jäger (1977).

<sup>2</sup>  $100 * (^{206}\text{Pb}/^{204}\text{Pb})_{\text{common}} / (^{206}\text{Pb}/^{204}\text{Pb})_{\text{sample}}$ .

<sup>3</sup>  $100 * (^{206}\text{Pb}/^{238}\text{U age}) / (^{207}\text{Pb}/^{206}\text{Pb age})$ .

**Appendix B:** U-Pb isotope data and –ages from the LA-ICP-MS analysis of zircon (sample 12001).

| Analysis                                               | Spot size<br>[ $\mu\text{m}$ ] | U*<br>[ppm] | Color† | Ratios‡                          |              | $^{207}\text{Pb}/^{235}\text{U}$ |              | $^{207}\text{Pb}/^{206}\text{Pb}$ |              | $\rho^{\S}$ | Ages [Ma]                        |              | $^{207}\text{Pb}/^{235}\text{U}$ |              | $^{207}\text{Pb}/^{206}\text{Pb}$ |              | $f^{206\%1}$ | Concordance <sup>2</sup> |  |
|--------------------------------------------------------|--------------------------------|-------------|--------|----------------------------------|--------------|----------------------------------|--------------|-----------------------------------|--------------|-------------|----------------------------------|--------------|----------------------------------|--------------|-----------------------------------|--------------|--------------|--------------------------|--|
|                                                        |                                |             |        | $^{206}\text{Pb}/^{238}\text{U}$ | $\pm 2$ s.d. | $^{207}\text{Pb}/^{235}\text{U}$ | $\pm 2$ s.d. | $^{207}\text{Pb}/^{206}\text{Pb}$ | $\pm 2$ s.d. |             | $^{206}\text{Pb}/^{238}\text{U}$ | $\pm 2$ s.d. | $^{207}\text{Pb}/^{235}\text{U}$ | $\pm 2$ s.d. | $^{207}\text{Pb}/^{206}\text{Pb}$ | $\pm 2$ s.d. |              |                          |  |
| <i>Size fraction: 200-300 <math>\mu\text{m}</math></i> |                                |             |        |                                  |              |                                  |              |                                   |              |             |                                  |              |                                  |              |                                   |              |              |                          |  |
| 42a                                                    | 35                             | 212         | y,t-0  | 0.1717                           | 0.0043       | 1.736                            | 0.059        | 0.0733                            | 0.0017       | 0.74        | 1021                             | 24           | 1022                             | 22           | 1023                              | 46           | 0.00         | 99.9                     |  |
| 42b                                                    | 35                             | 543         | y,t-0  | 0.1736                           | 0.0046       | 1.755                            | 0.054        | 0.0733                            | 0.0012       | 0.86        | 1032                             | 25           | 1029                             | 20           | 1023                              | 32           | 0.00         | 100.8                    |  |
| 43a                                                    | 35                             | 224         | y,t-0  | 0.2583                           | 0.0116       | 3.271                            | 0.167        | 0.0918                            | 0.0022       | 0.88        | 1481                             | 60           | 1474                             | 40           | 1464                              | 46           | 0.01         | 101.2                    |  |
| 43b                                                    | 35                             | 360         | y,t-0  | 0.2464                           | 0.0082       | 3.053                            | 0.117        | 0.0899                            | 0.0017       | 0.86        | 1420                             | 42           | 1421                             | 29           | 1422                              | 37           | 0.02         | 99.8                     |  |
| 44a                                                    | 35                             | 45          | y,t-0  | 0.1915                           | 0.0058       | 2.129                            | 0.083        | 0.0806                            | 0.0020       | 0.78        | 1129                             | 31           | 1158                             | 27           | 1213                              | 48           | 0.03         | 93.1                     |  |
| 44b                                                    | 35                             | 34          | y,t-0  | 0.2158                           | 0.0053       | 2.454                            | 0.083        | 0.0825                            | 0.0019       | 0.72        | 1259                             | 28           | 1259                             | 24           | 1257                              | 46           | 0.00         | 100.2                    |  |
| 45a                                                    | 35                             | 7           | y,t-0  | 0.2189                           | 0.0087       | 2.475                            | 0.149        | 0.0820                            | 0.0037       | 0.66        | 1276                             | 46           | 1265                             | 44           | 1245                              | 89           | 0.00         | 102.5                    |  |
| 45b                                                    | 25                             | 30          | y,t-0  | 0.1952                           | 0.0063       | 2.079                            | 0.094        | 0.0773                            | 0.0025       | 0.71        | 1149                             | 34           | 1142                             | 31           | 1128                              | 63           | 0.00         | 101.9                    |  |
| 46a                                                    | 35                             | 234         | y,t-0  | 0.3462                           | 0.0076       | 5.569                            | 0.180        | 0.1167                            | 0.0028       | 0.68        | 1916                             | 36           | 1911                             | 28           | 1906                              | 43           | 0.20         | 100.5                    |  |
| 46b                                                    | 35                             | 153         | y,t-0  | 0.3462                           | 0.0110       | 5.534                            | 0.210        | 0.1159                            | 0.0024       | 0.84        | 1916                             | 53           | 1906                             | 33           | 1895                              | 37           | 0.06         | 101.1                    |  |
| 47a                                                    | 35                             | 335         | y,t-0  | 0.4789                           | 0.0116       | 10.957                           | 0.309        | 0.1660                            | 0.0024       | 0.86        | 2522                             | 51           | 2520                             | 26           | 2517                              | 24           | 0.21         | 100.2                    |  |
| 47b                                                    | 25                             | 103         | y,t-0  | 0.2706                           | 0.0088       | 5.130                            | 0.208        | 0.1375                            | 0.0033       | 0.80        | 1544                             | 45           | 1841                             | 34           | 2196                              | 42           | 0.19         | 70.3                     |  |
| 48a                                                    | 35                             | 74          | y,t-0  | 0.2010                           | 0.0060       | 2.207                            | 0.085        | 0.0796                            | 0.0019       | 0.78        | 1181                             | 32           | 1183                             | 27           | 1188                              | 48           | 0.00         | 99.4                     |  |
| 48b                                                    | 35                             | 68          | y,t-0  | 0.1800                           | 0.0074       | 1.861                            | 0.102        | 0.0750                            | 0.0027       | 0.75        | 1067                             | 40           | 1067                             | 36           | 1069                              | 73           | 0.23         | 99.8                     |  |
| 49a                                                    | 35                             | 162         | y,t-0  | 0.2282                           | 0.0048       | 2.711                            | 0.072        | 0.0862                            | 0.0014       | 0.80        | 1325                             | 25           | 1332                             | 20           | 1342                              | 30           | 0.11         | 98.7                     |  |
| 49b                                                    | 35                             | 54          | y,t-0  | 0.1828                           | 0.0035       | 1.893                            | 0.057        | 0.0751                            | 0.0017       | 0.64        | 1082                             | 19           | 1079                             | 20           | 1072                              | 46           | 0.00         | 101.0                    |  |
| 49c                                                    | 35                             | 34          | y,t-0  | 0.1727                           | 0.0060       | 1.766                            | 0.080        | 0.0742                            | 0.0022       | 0.77        | 1027                             | 33           | 1033                             | 29           | 1047                              | 59           | 0.00         | 98.1                     |  |
| 50a                                                    | 35                             | 19          | y,t-0  | 0.1836                           | 0.0055       | 1.904                            | 0.084        | 0.0752                            | 0.0024       | 0.68        | 1087                             | 30           | 1083                             | 29           | 1074                              | 65           | 0.00         | 101.2                    |  |
| 50b                                                    | 35                             | 13          | y,t-0  | 0.1830                           | 0.0065       | 1.928                            | 0.100        | 0.0764                            | 0.0029       | 0.69        | 1084                             | 36           | 1091                             | 35           | 1106                              | 75           | 0.43         | 98.0                     |  |
| 51                                                     | 35                             | 288         | y,t-0  | 0.3307                           | 0.0098       | 5.143                            | 0.201        | 0.1128                            | 0.0029       | 0.76        | 1842                             | 47           | 1843                             | 33           | 1845                              | 46           | 0.20         | 99.8                     |  |
| 51b                                                    | 25                             | 212         | y,t-0  | 0.2681                           | 0.0094       | 4.036                            | 0.180        | 0.1092                            | 0.0030       | 0.79        | 1531                             | 48           | 1641                             | 36           | 1786                              | 50           | 0.00         | 85.7                     |  |
| <i>Size fraction: &gt;200 <math>\mu\text{m}</math></i> |                                |             |        |                                  |              |                                  |              |                                   |              |             |                                  |              |                                  |              |                                   |              |              |                          |  |
| 52                                                     | 25                             | 172         | y,t-0  | 0.2635                           | 0.0094       | 6.335                            | 0.273        | 0.1744                            | 0.0042       | 0.83        | 1507                             | 48           | 2023                             | 38           | 2600                              | 40           | 0.13         | 58.0                     |  |
| 53                                                     | 35                             | 91          | y,t-0  | 0.1268                           | 0.0020       | 1.165                            | 0.039        | 0.0666                            | 0.0020       | 0.46        | 769                              | 11           | 784                              | 18           | 827                               | 62           | 0.45         | 93.1                     |  |
| 54                                                     | 25                             | 131         | y,t-0  | 0.4198                           | 0.0069       | 10.472                           | 0.372        | 0.1809                            | 0.0057       | 0.46        | 2260                             | 31           | 2477                             | 33           | 2661                              | 52           | 0.00         | 84.9                     |  |
| 55                                                     | 35                             | 702         | y,t-1  | 0.1853                           | 0.0034       | 1.975                            | 0.055        | 0.0773                            | 0.0016       | 0.65        | 1096                             | 18           | 1107                             | 19           | 1129                              | 42           | 0.03         | 97.1                     |  |
| 56                                                     | 35                             | 42          | y,t-0  | 0.1863                           | 0.0048       | 1.957                            | 0.081        | 0.0762                            | 0.0025       | 0.61        | 1101                             | 26           | 1101                             | 28           | 1100                              | 66           | 0.00         | 100.1                    |  |
| 57                                                     | 35                             | 131         | y,t-0  | 0.2351                           | 0.0065       | 2.835                            | 0.117        | 0.0874                            | 0.0027       | 0.67        | 1361                             | 34           | 1365                             | 31           | 1370                              | 59           | 0.06         | 99.3                     |  |
| 58                                                     | 35                             | 421         | y,t-0  | 0.1691                           | 0.0049       | 1.705                            | 0.060        | 0.0731                            | 0.0015       | 0.82        | 1007                             | 27           | 1011                             | 22           | 1018                              | 41           | 0.00         | 99.0                     |  |
| 59                                                     | 35                             | 240         | y,t-0  | 0.1691                           | 0.0034       | 1.720                            | 0.047        | 0.0738                            | 0.0013       | 0.75        | 1007                             | 19           | 1016                             | 17           | 1036                              | 36           | 0.03         | 97.2                     |  |
| 60                                                     | 25                             | 153         | y,t-0  | 0.2241                           | 0.0092       | 2.621                            | 0.117        | 0.0848                            | 0.0015       | 0.92        | 1304                             | 48           | 1307                             | 33           | 1312                              | 35           | 0.09         | 99.4                     |  |
| 61                                                     | 35                             | 91          | y,t-0  | 0.1798                           | 0.0052       | 1.862                            | 0.065        | 0.0751                            | 0.0015       | 0.83        | 1066                             | 28           | 1068                             | 23           | 1072                              | 40           | 0.00         | 99.4                     |  |
| 62                                                     | 35                             | 64          | y,t-0  | 0.1821                           | 0.0040       | 1.873                            | 0.054        | 0.0746                            | 0.0014       | 0.77        | 1079                             | 22           | 1072                             | 19           | 1058                              | 37           | 0.00         | 101.9                    |  |

\* Internally-unstandardized estimates based on count rates of 238 only.

† Color of grains (b = brown, y,t = yellow-transparent, t = transparent, p = pink) and appearance in CL (0 = distinct, 1 = cloudy/patchy).

‡ Uncertainties are absolute internal 2 s.d.

$\rho^{\S}$  Correlation coefficient between errors on  $^{207}\text{Pb}/^{235}\text{U}$  and  $^{206}\text{Pb}/^{238}\text{U}$ .

$\uparrow$  Calculated using IsoPlot v. 3.72 (Ludwig, 2009) and applying the U-decay constant after Steiger and Jäger (1977).

<sup>1</sup>  $(^{206}\text{Pb}/^{204}\text{Pb})_{\text{common}} / (^{206}\text{Pb}/^{204}\text{Pb})_{\text{sample}}$ .

<sup>2</sup>  $100 * (^{206}\text{Pb}/^{238}\text{U age}) / (^{207}\text{Pb}/^{206}\text{Pb age})$ .

**Appendix B:** U-Pb isotope data and –ages from the LA-ICP-MS analysis of zircon (sample 12001).

| Analysis                                               | Spot size<br>[ $\mu\text{m}$ ] | U*<br>[ppm] | Color† | Ratios‡                          |              | $^{207}\text{Pb}/^{235}\text{U}$ | $\pm 2$ s.d. | $^{207}\text{Pb}/^{206}\text{Pb}$ | $\pm 2$ s.d. | $\rho^{\S}$ | Ages [Ma]                        |              | $\pm 2$ s.d. | $^{207}\text{Pb}/^{235}\text{U}$ | $\pm 2$ s.d. | $^{207}\text{Pb}/^{206}\text{Pb}$ | $\pm 2$ s.d. | $f^{206\%}{}^1$ | Concordance <sup>2</sup> |
|--------------------------------------------------------|--------------------------------|-------------|--------|----------------------------------|--------------|----------------------------------|--------------|-----------------------------------|--------------|-------------|----------------------------------|--------------|--------------|----------------------------------|--------------|-----------------------------------|--------------|-----------------|--------------------------|
|                                                        |                                |             |        | $^{206}\text{Pb}/^{238}\text{U}$ | $\pm 2$ s.d. |                                  |              |                                   |              |             | $^{206}\text{Pb}/^{238}\text{U}$ | $\pm 2$ s.d. |              |                                  |              |                                   |              |                 |                          |
| <b>Size fraction: &gt;200 <math>\mu\text{m}</math></b> |                                |             |        |                                  |              |                                  |              |                                   |              |             |                                  |              |              |                                  |              |                                   |              |                 |                          |
| 63                                                     | 35                             | 141         | y,t-0  | 0.2031                           | 0.0044       | 2.236                            | 0.059        | 0.0798                            | 0.0012       | 0.82        | 1192                             | 24           | 1192         | 19                               | 1193         | 30                                | 0.17         | 99.9            |                          |
| 64                                                     | 35                             | 80          | y,t-0  | 0.1916                           | 0.0036       | 2.188                            | 0.069        | 0.0828                            | 0.0021       | 0.60        | 1130                             | 20           | 1177         | 22                               | 1265         | 50                                | 0.23         | 89.3            |                          |
| 65                                                     | 35                             | 339         | y,t-0  | 0.1928                           | 0.0032       | 2.056                            | 0.044        | 0.0773                            | 0.0011       | 0.76        | 1136                             | 17           | 1134         | 15                               | 1130         | 28                                | 0.02         | 100.6           |                          |
| 66                                                     | 35                             | 54          | y,t-0  | 0.1610                           | 0.0044       | 1.578                            | 0.085        | 0.0711                            | 0.0033       | 0.51        | 962                              | 24           | 962          | 33                               | 961          | 95                                | 0.34         | 100.2           |                          |
| 67                                                     | 35                             | 107         | y,t-0  | 0.1911                           | 0.0038       | 2.049                            | 0.055        | 0.0778                            | 0.0014       | 0.73        | 1127                             | 20           | 1132         | 18                               | 1142         | 36                                | 0.04         | 98.7            |                          |

\* Internally-unstandardized estimates based on count rates of 238 only.

† Color of grains (b = brown, y,t = yellow-transparent, t = transparent, p = pink) and appearance in CL (0 = distinct, 1 = cloudy/patchy).

‡ Uncertainties are absolute internal 2 s.d.

$\rho^{\S}$  Correlation coefficient between errors on  $^{207}\text{Pb}/^{235}\text{U}$  and  $^{206}\text{Pb}/^{238}\text{U}$ .

$\dagger$  Calculated using IsoPlot v. 3.72 (Ludwig, 2009) and applying the U-decay constant after Steiger and Jäger (1977).

<sup>1</sup>  $(^{206}\text{Pb}/^{204}\text{Pb})_{\text{common}} / (^{206}\text{Pb}/^{204}\text{Pb})_{\text{sample}}$ .

<sup>2</sup>  $100 * (^{206}\text{Pb}/^{238}\text{U age}) / (^{207}\text{Pb}/^{206}\text{Pb age})$ .
