# Supplementary material
Source: publisher figshare collection journal article supplement (https://geolsoc.figshare.com/articles/dataset/_/3454952)
Supplement: Supplementary file 3 [file 1]

**Appendix A:** Geological map after Maijer et al. (a; 1987), illustrating the locations of the Sola and Garborg sample localities shown on the areal photographs (b) and (c), respectively ([www.norgebilder.no](http://www.norgebilder.no)). The average orientation of the regional amphibolite-facies foliation in these areas is indicated on the lower right of the areal photographs. Sample coordinates are given in the table below.

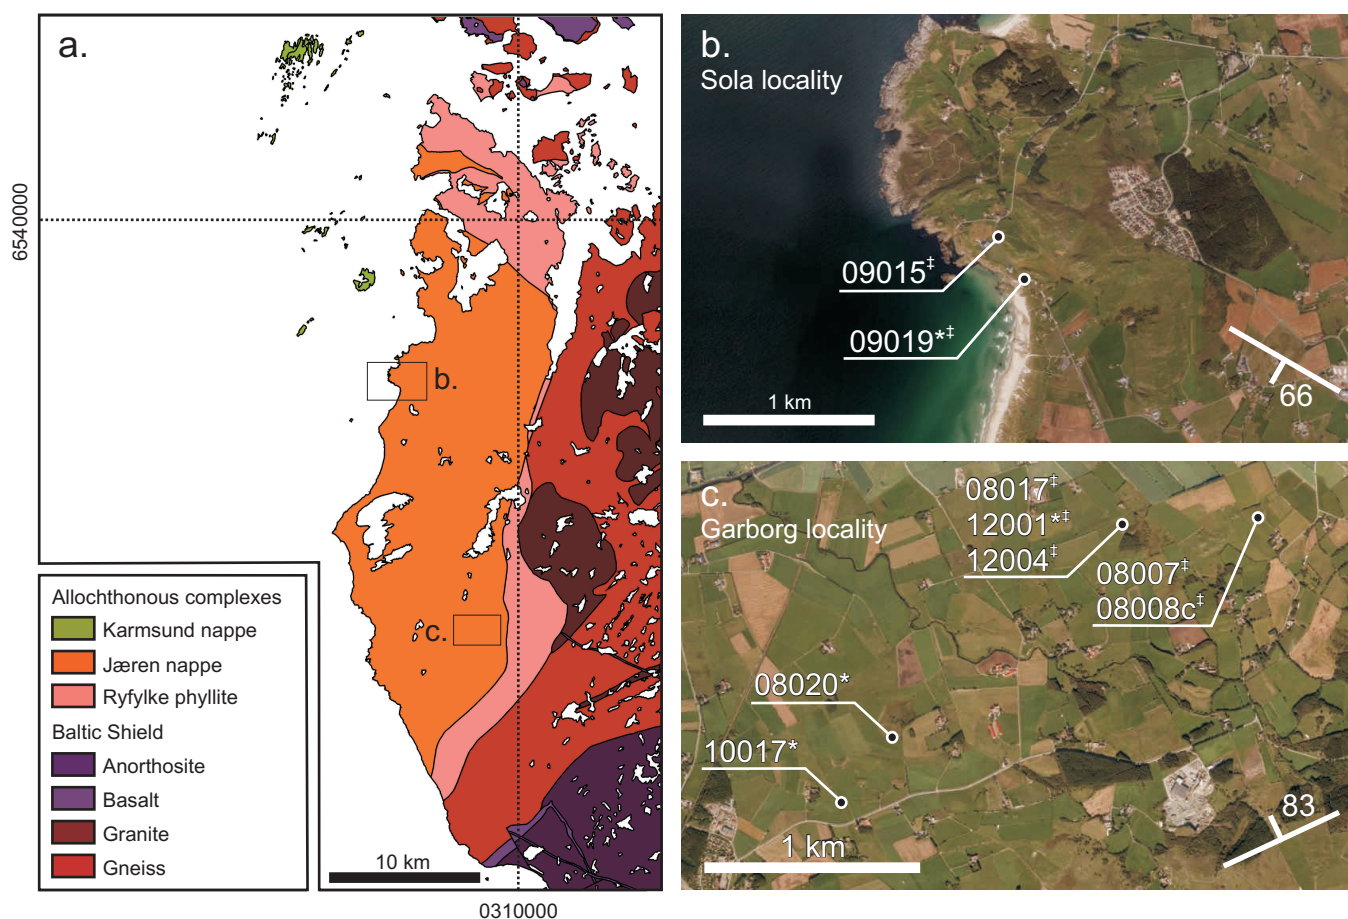

| Sample | UTM N   | UTM E   | Lithology                                |
|--------|---------|---------|------------------------------------------|
| 08007  | 6510566 | 0309024 | grt+bt+phe+qtz gneiss (metapelite)       |
| 08008c | 6510556 | 0309034 | ep+phe+qtz gneiss (metagreywacke)        |
| 08017  | 6510451 | 0308236 | grt+ky+bt+qtz gneiss (metapelite)        |
| 08020  | 6508905 | 0306867 | quartzite (metasandstone)                |
| 09015  | 6528357 | 0301517 | grt+bt+chl+qtz gneiss (metapelite)       |
| 09019  | 6528154 | 0301649 | grt+amp+phe+qtz gneiss (metagreywacke)   |
| 10017  | 6508872 | 0306482 | grt+qtz gneiss (metasandstone)           |
| 12001  | 6510426 | 0308227 | bt+phe+qtz gneiss (metapelite)           |
| 12004  | 6510464 | 0308225 | grt+amp+bt+pl+qtz gneiss (metagreywacke) |
