# Supplementary material
Source: publisher figshare collection journal article supplement (https://geolsoc.figshare.com/articles/dataset/_/3454952)
Supplement: Supplementary file 4 [file 1]

Appendix D: Biotite major element data (sample 08007).

| Grain | c/r <sup>1</sup> | Oxide content (wt%) |                  |                                |       |       |                   |                  |      | Total |
|-------|------------------|---------------------|------------------|--------------------------------|-------|-------|-------------------|------------------|------|-------|
|       |                  | SiO <sub>2</sub>    | TiO <sub>2</sub> | Al <sub>2</sub> O <sub>3</sub> | FeO   | MgO   | Na <sub>2</sub> O | K <sub>2</sub> O | BaO  |       |
| 1     | c                | 37.48               | 2.14             | 18.17                          | 17.35 | 9.40  | 0.21              | 7.96             | <DL  | 92.71 |
| 1     | r                | 38.19               | 1.69             | 17.91                          | 17.83 | 10.63 | 0.14              | 9.10             | 0.31 | 95.79 |
| 2     | c                | 36.83               | 2.70             | 17.34                          | 18.14 | 10.42 | 0.19              | 9.37             | 0.65 | 95.64 |
| 2     | r                | 37.00               | 2.52             | 17.59                          | 18.79 | 10.14 | 0.15              | 9.44             | 0.49 | 96.12 |
| 3     | c                | 37.23               | 2.44             | 17.59                          | 18.45 | 10.97 | 0.23              | 9.38             | 0.15 | 96.44 |
| 3     | r                | 37.49               | 2.57             | 16.78                          | 18.33 | 11.06 | 0.20              | 9.18             | 0.38 | 96.00 |
| 4     | c                | 37.39               | 2.43             | 17.16                          | 18.63 | 10.24 | 0.25              | 9.06             | 0.17 | 95.33 |
| 4     | r                | 36.64               | 2.10             | 17.23                          | 19.18 | 10.58 | 0.17              | 9.13             | 0.41 | 95.43 |
| 5     | c                | 37.13               | 2.55             | 17.27                          | 18.47 | 10.37 | 0.25              | 9.50             | 0.53 | 96.06 |
| 5     | r                | 37.59               | 2.57             | 17.30                          | 18.39 | 10.14 | 0.27              | 9.33             | <DL  | 95.59 |
| 6     | c                | 37.13               | 2.22             | 17.47                          | 18.64 | 10.37 | 0.20              | 9.43             | 0.27 | 95.73 |
| 6     | r                | 38.08               | 2.34             | 17.10                          | 18.66 | 10.22 | 0.17              | 9.27             | 0.31 | 96.14 |
| 7     | c                | 36.54               | 2.43             | 17.65                          | 17.41 | 11.09 | 0.20              | 6.93             | <DL  | 92.25 |
| 7     | r                | 38.53               | 2.60             | 17.65                          | 17.04 | 11.05 | 0.24              | 9.14             | <DL  | 96.25 |
| 8     | c                | 37.73               | 2.47             | 17.22                          | 19.01 | 10.27 | 0.18              | 9.02             | 0.51 | 96.41 |
| 8     | r                | 36.66               | 1.97             | 17.29                          | 18.34 | 10.41 | 0.20              | 8.94             | 0.34 | 94.15 |
| 9     | c                | 37.87               | 2.44             | 16.83                          | 16.23 | 12.21 | 0.31              | 9.35             | 0.36 | 95.59 |
| 9     | r                | 37.73               | 2.44             | 17.43                          | 16.74 | 11.66 | 0.23              | 9.38             | 0.29 | 95.90 |
| 10    | c                | 37.91               | 2.11             | 17.08                          | 19.26 | 10.27 | 0.25              | 9.53             | 0.32 | 96.73 |
| 10    | r                | 37.85               | 2.20             | 17.30                          | 19.04 | 10.22 | 0.14              | 9.62             | 0.15 | 96.52 |
| 11    | c                | 37.05               | 1.76             | 17.16                          | 18.87 | 10.35 | 0.19              | 9.28             | 0.29 | 94.95 |
| 11    | r                | 36.94               | 1.61             | 17.11                          | 18.64 | 10.59 | 0.22              | 9.27             | 0.16 | 94.54 |
| 12    | c                | 37.08               | 2.09             | 16.65                          | 19.22 | 10.55 | 0.24              | 9.19             | 0.49 | 95.51 |
| 12    | r                | 37.47               | 1.81             | 16.85                          | 18.86 | 10.65 | 0.23              | 9.23             | 0.49 | 95.59 |
| 13    | c                | 36.92               | 2.20             | 16.46                          | 20.00 | 9.91  | 0.26              | 9.33             | 0.47 | 95.55 |
| 13    | r                | 37.25               | 2.30             | 17.07                          | 19.28 | 10.21 | 0.16              | 9.42             | 0.37 | 96.06 |
| 14    | c                | 37.68               | 2.56             | 17.57                          | 17.55 | 10.94 | 0.26              | 9.44             | 0.45 | 96.45 |
| 14    | r                | 38.02               | 2.94             | 17.26                          | 17.48 | 10.82 | 0.14              | 9.63             | <DL  | 96.29 |
| 15    | c                | 38.06               | 2.12             | 16.90                          | 17.76 | 11.05 | 0.27              | 9.23             | 0.45 | 95.84 |
| 15    | r                | 37.78               | 2.34             | 17.03                          | 17.80 | 10.98 | 0.15              | 9.45             | <DL  | 95.53 |
| 16    | c                | 36.95               | 2.31             | 16.99                          | 19.26 | 10.25 | 0.21              | 9.33             | <DL  | 95.30 |
| 16    | r                | 37.50               | 1.99             | 17.31                          | 18.68 | 10.31 | 0.21              | 9.28             | 0.39 | 95.67 |
| 17    | c                | 36.54               | 2.27             | 17.03                          | 18.95 | 10.40 | 0.29              | 9.27             | 0.33 | 95.08 |
| 17    | r                | 37.12               | 2.24             | 16.75                          | 18.90 | 10.47 | 0.26              | 9.15             | 0.23 | 95.12 |
| 18    | c                | 37.31               | 2.30             | 17.07                          | 17.56 | 11.14 | 0.36              | 9.00             | 0.59 | 95.33 |
| 18    | r                | 36.14               | 2.56             | 17.04                          | 17.43 | 12.33 | 0.12              | 7.66             | 0.46 | 93.74 |
| 19    | c                | 36.75               | 2.13             | 17.19                          | 18.34 | 10.81 | 0.18              | 9.30             | 0.40 | 95.10 |
| 19    | r                | 36.46               | 2.29             | 16.85                          | 18.69 | 10.86 | 0.13              | 9.36             | 0.30 | 94.93 |
| 20    | c                | 37.47               | 2.31             | 16.76                          | 17.22 | 11.26 | 0.27              | 9.55             | <DL  | 94.84 |
| 20    | r                | 38.06               | 2.37             | 16.99                          | 17.55 | 11.15 | 0.20              | 9.41             | 0.25 | 95.98 |
| 21    | c                | 37.86               | 2.39             | 16.85                          | 19.03 | 10.24 | 0.27              | 9.26             | 0.25 | 96.15 |
| 21    | r                | 37.49               | 2.29             | 16.97                          | 19.17 | 10.41 | 0.24              | 9.23             | 0.39 | 96.18 |
| 22    | c                | 37.04               | 2.35             | 17.09                          | 18.87 | 10.32 | 0.27              | 9.31             | 0.47 | 95.71 |
| 22    | r                | 37.21               | 2.20             | 17.01                          | 18.52 | 10.23 | 0.30              | 9.36             | 0.45 | 95.27 |
| 23    | c                | 37.59               | 2.15             | 17.82                          | 17.44 | 11.48 | 0.24              | 9.32             | 0.31 | 96.35 |
| 23    | r                | 37.39               | 2.24             | 17.40                          | 16.79 | 11.67 | 0.12              | 9.41             | 0.35 | 95.37 |
| 24    | c                | 37.54               | 2.65             | 16.76                          | 17.76 | 11.03 | 0.25              | 9.29             | 0.39 | 95.67 |
| 24    | r                | 37.88               | 2.53             | 17.08                          | 17.40 | 10.98 | 0.32              | 9.41             | <DL  | 95.60 |
| 25    | c                | 37.41               | 2.48             | 17.26                          | 19.52 | 10.11 | 0.23              | 9.58             | <DL  | 96.59 |
| 25    | r                | 36.86               | 2.67             | 16.46                          | 19.59 | 9.63  | 0.18              | 9.05             | 0.30 | 94.75 |
| 26    | c                | 37.29               | 1.92             | 17.20                          | 18.79 | 10.40 | 0.16              | 8.83             | 0.33 | 94.92 |
| 26    | r                | 37.87               | 1.90             | 17.38                          | 19.23 | 10.25 | 0.19              | 9.40             | 0.31 | 96.54 |
| 27    | c                | 37.05               | 1.89             | 17.78                          | 18.13 | 10.61 | 0.20              | 8.06             | 0.19 | 93.91 |
| 27    | r                | 37.09               | 2.08             | 17.17                          | 18.84 | 10.50 | 0.18              | 9.25             | 0.18 | 95.29 |
| 28    | c                | 37.25               | 2.86             | 16.86                          | 19.58 | 9.93  | 0.25              | 9.11             | 0.39 | 96.22 |
| 28    | r                | 37.66               | 2.55             | 16.80                          | 19.29 | 9.99  | 0.16              | 9.22             | 0.36 | 96.02 |
| 29    | c                | 37.65               | 2.06             | 18.03                          | 18.84 | 10.07 | 0.28              | 9.22             | 0.34 | 96.49 |
| 29    | r                | 37.74               | 2.05             | 17.56                          | 18.99 | 10.22 | 0.27              | 9.17             | 0.36 | 96.37 |

Abbreviations: <DL = below detection limits, n.a. = not analyzed. CaO and MnO were ≤ DL.

<sup>1</sup> Core (c) or rim (r) of grains.

**Appendix D:** Biotite major element data (sample 08007).

| Grain | c/r <sup>1</sup> | Cation content (pfu; O=11) |       |       |       |       |       |       |       | Total |
|-------|------------------|----------------------------|-------|-------|-------|-------|-------|-------|-------|-------|
|       |                  | Si                         | Ti    | Al    | Fe    | Mg    | Na    | K     | Ba    |       |
| 1     | c                | 2.859                      | 0.123 | 1.634 | 1.107 | 1.069 | 0.031 | 0.775 | 0.004 | 7.604 |
| 1     | r                | 2.848                      | 0.095 | 1.574 | 1.112 | 1.182 | 0.020 | 0.866 | 0.009 | 7.712 |
| 2     | c                | 2.782                      | 0.153 | 1.544 | 1.146 | 1.173 | 0.028 | 0.903 | 0.019 | 7.756 |
| 2     | r                | 2.785                      | 0.143 | 1.561 | 1.183 | 1.138 | 0.021 | 0.907 | 0.015 | 7.755 |
| 3     | c                | 2.777                      | 0.137 | 1.546 | 1.151 | 1.220 | 0.034 | 0.893 | 0.004 | 7.774 |
| 3     | r                | 2.812                      | 0.145 | 1.483 | 1.150 | 1.237 | 0.029 | 0.878 | 0.011 | 7.754 |
| 4     | c                | 2.821                      | 0.138 | 1.526 | 1.175 | 1.152 | 0.037 | 0.872 | 0.005 | 7.733 |
| 4     | r                | 2.782                      | 0.120 | 1.542 | 1.218 | 1.198 | 0.025 | 0.884 | 0.012 | 7.781 |
| 5     | c                | 2.797                      | 0.144 | 1.533 | 1.163 | 1.164 | 0.036 | 0.913 | 0.015 | 7.767 |
| 5     | r                | 2.822                      | 0.145 | 1.531 | 1.155 | 1.135 | 0.039 | 0.894 | 0.004 | 7.731 |
| 6     | c                | 2.800                      | 0.126 | 1.553 | 1.176 | 1.166 | 0.029 | 0.907 | 0.008 | 7.765 |
| 6     | r                | 2.848                      | 0.132 | 1.507 | 1.167 | 1.140 | 0.024 | 0.884 | 0.009 | 7.720 |
| 7     | c                | 2.794                      | 0.140 | 1.590 | 1.113 | 1.264 | 0.030 | 0.676 | 0.003 | 7.623 |
| 7     | r                | 2.842                      | 0.144 | 1.534 | 1.051 | 1.215 | 0.034 | 0.860 | 0.001 | 7.691 |
| 8     | c                | 2.822                      | 0.139 | 1.518 | 1.189 | 1.145 | 0.026 | 0.861 | 0.015 | 7.722 |
| 8     | r                | 2.804                      | 0.113 | 1.558 | 1.173 | 1.187 | 0.030 | 0.872 | 0.010 | 7.754 |
| 9     | c                | 2.825                      | 0.137 | 1.479 | 1.012 | 1.358 | 0.044 | 0.890 | 0.010 | 7.766 |
| 9     | r                | 2.808                      | 0.137 | 1.529 | 1.042 | 1.294 | 0.033 | 0.891 | 0.008 | 7.753 |
| 10    | c                | 2.834                      | 0.119 | 1.505 | 1.204 | 1.145 | 0.036 | 0.909 | 0.009 | 7.766 |
| 10    | r                | 2.828                      | 0.124 | 1.524 | 1.190 | 1.138 | 0.020 | 0.917 | 0.005 | 7.753 |
| 11    | c                | 2.820                      | 0.101 | 1.539 | 1.201 | 1.174 | 0.028 | 0.901 | 0.009 | 7.774 |
| 11    | r                | 2.818                      | 0.092 | 1.538 | 1.189 | 1.204 | 0.033 | 0.902 | 0.005 | 7.788 |
| 12    | c                | 2.815                      | 0.119 | 1.490 | 1.220 | 1.194 | 0.035 | 0.890 | 0.014 | 7.783 |
| 12    | r                | 2.833                      | 0.103 | 1.502 | 1.193 | 1.200 | 0.034 | 0.890 | 0.014 | 7.775 |
| 13    | c                | 2.816                      | 0.126 | 1.480 | 1.276 | 1.127 | 0.039 | 0.908 | 0.014 | 7.790 |
| 13    | r                | 2.809                      | 0.130 | 1.517 | 1.216 | 1.148 | 0.024 | 0.906 | 0.011 | 7.767 |
| 14    | c                | 2.805                      | 0.143 | 1.541 | 1.092 | 1.214 | 0.038 | 0.896 | 0.013 | 7.748 |
| 14    | r                | 2.822                      | 0.164 | 1.510 | 1.085 | 1.197 | 0.020 | 0.912 | 0.002 | 7.723 |
| 15    | c                | 2.850                      | 0.119 | 1.491 | 1.112 | 1.233 | 0.039 | 0.882 | 0.013 | 7.745 |
| 15    | r                | 2.832                      | 0.132 | 1.504 | 1.116 | 1.227 | 0.022 | 0.904 | 0.001 | 7.745 |
| 16    | c                | 2.802                      | 0.132 | 1.518 | 1.221 | 1.159 | 0.031 | 0.903 | 0.002 | 7.773 |
| 16    | r                | 2.827                      | 0.113 | 1.538 | 1.178 | 1.159 | 0.030 | 0.893 | 0.012 | 7.752 |
| 17    | c                | 2.786                      | 0.130 | 1.530 | 1.208 | 1.182 | 0.043 | 0.902 | 0.010 | 7.791 |
| 17    | r                | 2.819                      | 0.128 | 1.499 | 1.200 | 1.185 | 0.039 | 0.887 | 0.007 | 7.766 |
| 18    | c                | 2.811                      | 0.130 | 1.516 | 1.106 | 1.251 | 0.053 | 0.865 | 0.017 | 7.758 |
| 18    | r                | 2.751                      | 0.147 | 1.529 | 1.110 | 1.399 | 0.017 | 0.744 | 0.014 | 7.718 |
| 19    | c                | 2.790                      | 0.122 | 1.538 | 1.165 | 1.224 | 0.026 | 0.901 | 0.012 | 7.782 |
| 19    | r                | 2.778                      | 0.131 | 1.513 | 1.191 | 1.234 | 0.019 | 0.910 | 0.009 | 7.796 |
| 20    | c                | 2.831                      | 0.131 | 1.492 | 1.088 | 1.268 | 0.040 | 0.920 | 0.000 | 7.772 |
| 20    | r                | 2.840                      | 0.133 | 1.494 | 1.095 | 1.240 | 0.029 | 0.896 | 0.007 | 7.743 |
| 21    | c                | 2.840                      | 0.135 | 1.490 | 1.194 | 1.145 | 0.039 | 0.886 | 0.007 | 7.743 |
| 21    | r                | 2.819                      | 0.130 | 1.504 | 1.205 | 1.167 | 0.034 | 0.885 | 0.011 | 7.760 |
| 22    | c                | 2.802                      | 0.134 | 1.523 | 1.194 | 1.164 | 0.039 | 0.898 | 0.014 | 7.771 |
| 22    | r                | 2.821                      | 0.125 | 1.520 | 1.174 | 1.156 | 0.044 | 0.905 | 0.013 | 7.768 |
| 23    | c                | 2.794                      | 0.120 | 1.561 | 1.084 | 1.272 | 0.034 | 0.884 | 0.009 | 7.765 |
| 23    | r                | 2.801                      | 0.126 | 1.536 | 1.052 | 1.303 | 0.018 | 0.899 | 0.010 | 7.761 |
| 24    | c                | 2.820                      | 0.150 | 1.484 | 1.116 | 1.235 | 0.036 | 0.890 | 0.011 | 7.751 |
| 24    | r                | 2.832                      | 0.142 | 1.505 | 1.088 | 1.224 | 0.047 | 0.898 | 0.003 | 7.745 |
| 25    | c                | 2.801                      | 0.140 | 1.523 | 1.222 | 1.128 | 0.033 | 0.915 | 0.000 | 7.770 |
| 25    | r                | 2.821                      | 0.154 | 1.485 | 1.254 | 1.099 | 0.027 | 0.884 | 0.009 | 7.737 |
| 26    | c                | 2.828                      | 0.110 | 1.537 | 1.192 | 1.176 | 0.023 | 0.854 | 0.010 | 7.732 |
| 26    | r                | 2.833                      | 0.107 | 1.532 | 1.203 | 1.143 | 0.028 | 0.897 | 0.009 | 7.757 |
| 27    | c                | 2.813                      | 0.108 | 1.591 | 1.151 | 1.201 | 0.029 | 0.781 | 0.006 | 7.688 |
| 27    | r                | 2.807                      | 0.118 | 1.532 | 1.193 | 1.185 | 0.026 | 0.893 | 0.005 | 7.768 |
| 28    | c                | 2.805                      | 0.162 | 1.496 | 1.233 | 1.115 | 0.036 | 0.875 | 0.011 | 7.740 |
| 28    | r                | 2.834                      | 0.144 | 1.490 | 1.214 | 1.121 | 0.023 | 0.885 | 0.010 | 7.730 |
| 29    | c                | 2.809                      | 0.116 | 1.585 | 1.175 | 1.120 | 0.040 | 0.877 | 0.010 | 7.740 |
| 29    | r                | 2.823                      | 0.115 | 1.548 | 1.188 | 1.140 | 0.040 | 0.875 | 0.011 | 7.744 |

<sup>1</sup> Core (c) or rim (r) of grains

**Appendix D:** Biotite major element data (sample 08008c).

| Grain | c/r <sup>1</sup> | Oxide content (wt%) |                  | Al <sub>2</sub> O <sub>3</sub> | FeO   | MgO   | Na <sub>2</sub> O | K <sub>2</sub> O | BaO  | Total |
|-------|------------------|---------------------|------------------|--------------------------------|-------|-------|-------------------|------------------|------|-------|
|       |                  | SiO <sub>2</sub>    | TiO <sub>2</sub> |                                |       |       |                   |                  |      |       |
| 1     | c                | 36.56               | 3.53             | 15.51                          | 24.24 | 6.77  | 0.07              | 9.19             | <DL  | 95.87 |
| 1     | r                | 37.13               | 2.83             | 15.47                          | 24.49 | 6.94  | <DL               | 9.37             | 0.41 | 96.64 |
| 2     | c                | 37.39               | 2.93             | 15.95                          | 21.34 | 8.52  | 0.03              | 8.09             | 0.23 | 94.48 |
| 2     | r                | 35.89               | 2.55             | 15.46                          | 21.60 | 9.15  | 0.02              | 8.45             | 0.32 | 93.45 |
| 3     | c                | 36.68               | 3.35             | 15.51                          | 23.91 | 7.21  | 0.05              | 9.41             | <DL  | 96.12 |
| 3     | r                | 35.77               | 3.60             | 15.04                          | 23.58 | 6.83  | 0.03              | 9.07             | 0.15 | 94.07 |
| 4     | c                | 36.16               | 2.50             | 15.18                          | 21.50 | 8.86  | 0.12              | 7.83             | 0.23 | 92.38 |
| 4     | r                | 36.11               | 2.64             | 15.63                          | 21.68 | 8.87  | 0.09              | 7.43             | 0.21 | 92.66 |
| 5     | c                | 37.42               | 3.08             | 15.48                          | 21.95 | 8.48  | <DL               | 9.93             | 0.40 | 96.74 |
| 5     | r                | 37.61               | 2.32             | 16.16                          | 21.45 | 8.75  | 0.06              | 8.35             | 0.18 | 94.88 |
| 6     | c                | 36.77               | 2.57             | 15.58                          | 22.30 | 8.07  | 0.05              | 9.55             | 0.20 | 95.09 |
| 6     | r                | 35.54               | 1.75             | 14.72                          | 23.34 | 8.70  | 0.05              | 7.71             | 0.22 | 92.02 |
| 7     | c                | 36.87               | 2.86             | 15.41                          | 21.68 | 8.61  | 0.05              | 8.27             | 0.18 | 93.93 |
| 7     | r                | 35.15               | 1.68             | 15.89                          | 22.40 | 9.71  | 0.05              | 7.37             | <DL  | 92.25 |
| 8     | c                | 38.44               | 2.81             | 17.24                          | 20.32 | 7.97  | 0.08              | 9.73             | <DL  | 96.59 |
| 8     | r                | 37.87               | 2.86             | 16.51                          | 22.14 | 8.66  | 0.10              | 8.95             | 0.55 | 97.65 |
| 9     | c                | 36.51               | 3.25             | 15.37                          | 21.43 | 8.79  | 0.12              | 8.07             | 0.43 | 93.97 |
| 9     | r                | 36.28               | 2.22             | 15.80                          | 20.28 | 9.55  | 0.07              | 7.47             | 0.34 | 92.01 |
| 10    | c                | 37.00               | 3.02             | 15.02                          | 21.18 | 8.79  | 0.05              | 8.97             | 0.46 | 94.49 |
| 10    | r                | 36.40               | 2.68             | 15.28                          | 20.25 | 9.53  | 0.07              | 9.52             | 0.19 | 93.93 |
| 11    | c                | 36.69               | 2.70             | 15.41                          | 20.02 | 9.90  | 0.09              | 9.13             | 0.35 | 94.29 |
| 11    | r                | 36.31               | 1.90             | 15.61                          | 17.29 | 8.38  | <DL               | 6.18             | <DL  | 85.67 |
| 12    | c                | 36.90               | 2.77             | 16.29                          | 21.56 | 8.57  | 0.07              | 9.50             | 0.37 | 96.03 |
| 12    | r                | 37.03               | 3.07             | 15.56                          | 20.43 | 8.39  | 0.09              | 9.43             | <DL  | 94.00 |
| 13    | c                | 37.24               | 3.10             | 16.35                          | 21.42 | 8.60  | 0.08              | 9.54             | 0.26 | 96.59 |
| 13    | r                | 37.39               | 2.94             | 16.11                          | 20.74 | 8.35  | 0.16              | 9.31             | 0.17 | 95.17 |
| 14    | c                | 37.04               | 2.97             | 15.21                          | 22.21 | 9.03  | 0.03              | 9.71             | <DL  | 96.20 |
| 14    | r                | 37.83               | 2.88             | 15.23                          | 21.58 | 8.77  | 0.09              | 9.65             | 0.32 | 96.35 |
| 15    | c                | 38.24               | 2.94             | 16.10                          | 21.84 | 7.70  | 0.08              | 9.45             | 0.20 | 96.55 |
| 15    | r                | 36.58               | 2.56             | 16.21                          | 21.80 | 8.65  | 0.03              | 9.80             | 0.15 | 95.78 |
| 16    | c                | 37.19               | 2.83             | 15.60                          | 21.29 | 7.96  | 0.06              | 8.78             | <DL  | 93.71 |
| 16    | r                | 37.20               | 2.86             | 15.17                          | 22.26 | 7.91  | 0.09              | 9.13             | 0.36 | 94.97 |
| 17    | c                | 36.55               | 3.22             | 15.62                          | 22.34 | 8.43  | 0.03              | 9.65             | 0.42 | 96.26 |
| 17    | r                | 36.20               | 2.99             | 15.74                          | 22.23 | 8.68  | 0.09              | 9.90             | 0.22 | 96.05 |
| 18    | c                | 36.93               | 3.49             | 15.35                          | 23.36 | 7.37  | 0.07              | 9.72             | <DL  | 96.29 |
| 18    | r                | 37.09               | 3.54             | 15.40                          | 22.47 | 7.04  | 0.04              | 9.70             | 0.25 | 95.52 |
| 19    | c                | 37.75               | 2.64             | 15.52                          | 19.63 | 10.44 | 0.08              | 9.74             | 0.48 | 96.27 |
| 19    | r                | 37.26               | 2.47             | 15.25                          | 18.77 | 10.87 | 0.12              | 9.79             | 0.34 | 94.87 |
| 20    | c                | 36.88               | 2.85             | 15.70                          | 21.86 | 8.46  | <DL               | 9.50             | 0.15 | 95.40 |
| 20    | r                | 37.23               | 2.08             | 16.05                          | 22.46 | 8.52  | 0.06              | 9.54             | <DL  | 95.94 |
| 21    | c                | 35.94               | 3.20             | 15.38                          | 23.45 | 7.08  | 0.07              | 9.50             | <DL  | 94.62 |
| 21    | r                | 35.61               | 3.18             | 15.18                          | 23.45 | 7.25  | <DL               | 9.79             | 0.68 | 95.14 |
| 22    | c                | 36.60               | 2.58             | 16.02                          | 21.36 | 8.51  | 0.06              | 7.92             | <DL  | 93.05 |
| 22    | r                | 37.49               | 2.68             | 16.13                          | 20.45 | 8.47  | 0.11              | 8.76             | 0.21 | 94.30 |
| 23    | c                | 37.26               | 3.14             | 15.61                          | 19.88 | 9.19  | 0.06              | 8.59             | 0.35 | 94.08 |
| 23    | r                | 38.53               | 2.89             | 15.74                          | 18.84 | 8.83  | 0.07              | 7.76             | <DL  | 92.66 |
| 24    | c                | 36.72               | 2.56             | 15.07                          | 21.31 | 9.12  | 0.05              | 9.56             | <DL  | 94.39 |
| 24    | r                | 37.07               | 2.71             | 15.16                          | 20.97 | 9.01  | 0.06              | 9.17             | <DL  | 94.15 |
| 25    | c                | 37.08               | 3.25             | 15.44                          | 20.46 | 8.84  | 0.10              | 8.49             | 0.27 | 93.93 |
| 25    | r                | 35.40               | 3.24             | 14.57                          | 20.84 | 9.27  | 0.06              | 8.73             | 0.27 | 92.38 |
| 26    | c                | 36.74               | 3.30             | 15.19                          | 22.22 | 8.16  | 0.12              | 9.42             | 0.26 | 95.41 |
| 26    | r                | 36.36               | 3.28             | 15.00                          | 22.21 | 8.07  | 0.03              | 9.74             | 0.46 | 95.15 |
| 27    | c                | 36.77               | 3.02             | 15.44                          | 21.25 | 9.20  | 0.04              | 9.70             | 0.50 | 95.92 |
| 27    | r                | 36.31               | 3.03             | 14.90                          | 20.76 | 9.53  | 0.06              | 9.19             | <DL  | 93.78 |
| 28    | c                | 37.26               | 2.92             | 15.92                          | 22.23 | 8.27  | 0.06              | 9.69             | 0.51 | 96.86 |
| 28    | r                | 35.77               | 2.42             | 15.19                          | 21.49 | 9.15  | 0.15              | 9.99             | 0.37 | 94.53 |
| 29    | c                | 37.50               | 3.08             | 15.80                          | 21.31 | 9.05  | 0.07              | 9.79             | 0.41 | 97.01 |
| 29    | r                | 37.47               | 3.03             | 15.06                          | 21.36 | 8.75  | 0.04              | 9.57             | <DL  | 95.28 |
| 30    | c                | 36.53               | 3.18             | 15.97                          | 23.10 | 7.27  | 0.10              | 9.65             | 0.17 | 95.97 |
| 30    | r                | 36.62               | 2.55             | 15.78                          | 23.49 | 7.62  | 0.04              | 9.48             | 0.36 | 95.94 |

Abbreviations: <DL = below detection limits, n.a. = not analyzed. CaO and MnO were ≤ DL.

<sup>1</sup> Core (c) or rim (r) of grains.

**Appendix D:** Biotite major element data (sample 08008c).

| Grain | c/r <sup>1</sup> | Cation content (pfu; O=11) |       |       |       |       |       |       |       | Total |
|-------|------------------|----------------------------|-------|-------|-------|-------|-------|-------|-------|-------|
|       |                  | Si                         | Ti    | Al    | Fe    | Mg    | Na    | K     | Ba    |       |
| 1     | c                | 2.825                      | 0.205 | 1.412 | 1.566 | 0.780 | 0.010 | 0.906 | 0.001 | 7.720 |
| 1     | r                | 2.854                      | 0.164 | 1.401 | 1.574 | 0.795 | 0.000 | 0.919 | 0.012 | 7.739 |
| 2     | c                | 2.866                      | 0.169 | 1.441 | 1.368 | 0.973 | 0.004 | 0.791 | 0.007 | 7.643 |
| 2     | r                | 2.810                      | 0.150 | 1.427 | 1.414 | 1.068 | 0.004 | 0.844 | 0.010 | 7.750 |
| 3     | c                | 2.823                      | 0.194 | 1.407 | 1.539 | 0.827 | 0.008 | 0.924 | 0.004 | 7.744 |
| 3     | r                | 2.818                      | 0.213 | 1.397 | 1.554 | 0.802 | 0.004 | 0.912 | 0.005 | 7.727 |
| 4     | c                | 2.848                      | 0.148 | 1.409 | 1.416 | 1.040 | 0.019 | 0.787 | 0.007 | 7.702 |
| 4     | r                | 2.827                      | 0.155 | 1.442 | 1.419 | 1.035 | 0.014 | 0.742 | 0.006 | 7.674 |
| 5     | c                | 2.848                      | 0.176 | 1.388 | 1.397 | 0.962 | 0.000 | 0.964 | 0.012 | 7.764 |
| 5     | r                | 2.874                      | 0.133 | 1.456 | 1.371 | 0.997 | 0.008 | 0.814 | 0.005 | 7.675 |
| 6     | c                | 2.848                      | 0.150 | 1.422 | 1.444 | 0.932 | 0.008 | 0.944 | 0.006 | 7.767 |
| 6     | r                | 2.843                      | 0.105 | 1.388 | 1.561 | 1.037 | 0.007 | 0.787 | 0.007 | 7.755 |
| 7     | c                | 2.858                      | 0.167 | 1.408 | 1.405 | 0.995 | 0.007 | 0.818 | 0.005 | 7.683 |
| 7     | r                | 2.773                      | 0.100 | 1.478 | 1.478 | 1.142 | 0.008 | 0.742 | 0.001 | 7.760 |
| 8     | c                | 2.878                      | 0.158 | 1.521 | 1.272 | 0.889 | 0.011 | 0.929 | 0.000 | 7.673 |
| 8     | r                | 2.833                      | 0.161 | 1.456 | 1.385 | 0.966 | 0.015 | 0.854 | 0.016 | 7.711 |
| 9     | c                | 2.830                      | 0.189 | 1.404 | 1.389 | 1.016 | 0.018 | 0.798 | 0.013 | 7.685 |
| 9     | r                | 2.841                      | 0.131 | 1.458 | 1.328 | 1.115 | 0.010 | 0.746 | 0.011 | 7.674 |
| 10    | c                | 2.864                      | 0.176 | 1.370 | 1.371 | 1.014 | 0.008 | 0.886 | 0.014 | 7.720 |
| 10    | r                | 2.831                      | 0.157 | 1.401 | 1.317 | 1.105 | 0.011 | 0.944 | 0.006 | 7.789 |
| 11    | c                | 2.831                      | 0.157 | 1.402 | 1.292 | 1.139 | 0.014 | 0.899 | 0.011 | 7.765 |
| 11    | r                | 2.973                      | 0.117 | 1.506 | 1.184 | 1.023 | 0.001 | 0.646 | 0.000 | 7.479 |
| 12    | c                | 2.816                      | 0.159 | 1.465 | 1.376 | 0.975 | 0.010 | 0.925 | 0.011 | 7.756 |
| 12    | r                | 2.865                      | 0.179 | 1.419 | 1.322 | 0.968 | 0.014 | 0.931 | 0.003 | 7.717 |
| 13    | c                | 2.820                      | 0.177 | 1.459 | 1.356 | 0.971 | 0.012 | 0.921 | 0.008 | 7.739 |
| 13    | r                | 2.859                      | 0.169 | 1.452 | 1.326 | 0.952 | 0.024 | 0.908 | 0.005 | 7.710 |
| 14    | c                | 2.829                      | 0.171 | 1.369 | 1.419 | 1.028 | 0.004 | 0.946 | 0.004 | 7.789 |
| 14    | r                | 2.878                      | 0.165 | 1.366 | 1.373 | 0.995 | 0.013 | 0.937 | 0.010 | 7.748 |
| 15    | c                | 2.889                      | 0.167 | 1.434 | 1.380 | 0.867 | 0.011 | 0.911 | 0.006 | 7.685 |
| 15    | r                | 2.805                      | 0.148 | 1.465 | 1.398 | 0.989 | 0.004 | 0.959 | 0.005 | 7.794 |
| 16    | c                | 2.886                      | 0.165 | 1.427 | 1.382 | 0.921 | 0.008 | 0.869 | 0.000 | 7.673 |
| 16    | r                | 2.878                      | 0.166 | 1.383 | 1.440 | 0.912 | 0.013 | 0.901 | 0.011 | 7.721 |
| 17    | c                | 2.802                      | 0.186 | 1.411 | 1.432 | 0.964 | 0.004 | 0.944 | 0.013 | 7.776 |
| 17    | r                | 2.781                      | 0.173 | 1.425 | 1.428 | 0.994 | 0.013 | 0.970 | 0.006 | 7.821 |
| 18    | c                | 2.837                      | 0.202 | 1.390 | 1.501 | 0.844 | 0.011 | 0.952 | 0.001 | 7.749 |
| 18    | r                | 2.862                      | 0.205 | 1.401 | 1.450 | 0.810 | 0.006 | 0.955 | 0.007 | 7.710 |
| 19    | c                | 2.851                      | 0.150 | 1.381 | 1.240 | 1.175 | 0.011 | 0.938 | 0.014 | 7.780 |
| 19    | r                | 2.849                      | 0.142 | 1.374 | 1.200 | 1.239 | 0.018 | 0.955 | 0.010 | 7.807 |
| 20    | c                | 2.836                      | 0.165 | 1.423 | 1.406 | 0.970 | 0.002 | 0.932 | 0.004 | 7.752 |
| 20    | r                | 2.846                      | 0.120 | 1.446 | 1.436 | 0.971 | 0.009 | 0.930 | 0.000 | 7.779 |
| 21    | c                | 2.815                      | 0.189 | 1.420 | 1.536 | 0.827 | 0.010 | 0.949 | 0.000 | 7.765 |
| 21    | r                | 2.798                      | 0.188 | 1.406 | 1.541 | 0.849 | 0.000 | 0.981 | 0.021 | 7.799 |
| 22    | c                | 2.849                      | 0.151 | 1.470 | 1.390 | 0.988 | 0.008 | 0.786 | 0.002 | 7.661 |
| 22    | r                | 2.879                      | 0.155 | 1.460 | 1.313 | 0.970 | 0.017 | 0.858 | 0.006 | 7.672 |
| 23    | c                | 2.863                      | 0.181 | 1.414 | 1.277 | 1.053 | 0.009 | 0.842 | 0.011 | 7.672 |
| 23    | r                | 2.955                      | 0.167 | 1.423 | 1.208 | 1.010 | 0.010 | 0.759 | 0.000 | 7.551 |
| 24    | c                | 2.849                      | 0.149 | 1.378 | 1.383 | 1.055 | 0.008 | 0.946 | 0.001 | 7.788 |
| 24    | r                | 2.868                      | 0.158 | 1.382 | 1.357 | 1.039 | 0.008 | 0.905 | 0.000 | 7.740 |
| 25    | c                | 2.863                      | 0.189 | 1.405 | 1.321 | 1.018 | 0.015 | 0.836 | 0.008 | 7.670 |
| 25    | r                | 2.805                      | 0.193 | 1.361 | 1.381 | 1.095 | 0.009 | 0.882 | 0.008 | 7.765 |
| 26    | c                | 2.837                      | 0.192 | 1.383 | 1.435 | 0.939 | 0.019 | 0.928 | 0.008 | 7.752 |
| 26    | r                | 2.828                      | 0.192 | 1.375 | 1.445 | 0.936 | 0.004 | 0.966 | 0.014 | 7.778 |
| 27    | c                | 2.818                      | 0.174 | 1.394 | 1.362 | 1.051 | 0.006 | 0.948 | 0.015 | 7.787 |
| 27    | r                | 2.826                      | 0.177 | 1.367 | 1.351 | 1.106 | 0.008 | 0.913 | 0.000 | 7.772 |
| 28    | c                | 2.831                      | 0.167 | 1.426 | 1.412 | 0.937 | 0.009 | 0.939 | 0.015 | 7.760 |
| 28    | r                | 2.795                      | 0.142 | 1.399 | 1.404 | 1.066 | 0.022 | 0.996 | 0.011 | 7.864 |
| 29    | c                | 2.833                      | 0.175 | 1.407 | 1.346 | 1.019 | 0.010 | 0.944 | 0.012 | 7.763 |
| 29    | r                | 2.874                      | 0.175 | 1.362 | 1.370 | 1.001 | 0.006 | 0.937 | 0.000 | 7.740 |
| 30    | c                | 2.817                      | 0.184 | 1.452 | 1.490 | 0.836 | 0.014 | 0.949 | 0.005 | 7.754 |
| 30    | r                | 2.826                      | 0.148 | 1.435 | 1.516 | 0.877 | 0.006 | 0.933 | 0.011 | 7.775 |

<sup>1</sup> Core (c) or rim (r) of grains.

**Appendix D:** Biotite major element data (sample 08017).

| Grain | c/r <sup>1</sup> | Oxide content (wt%) |                  | Al <sub>2</sub> O <sub>3</sub> | FeO   | MgO   | Na <sub>2</sub> O | K <sub>2</sub> O | BaO  | Total |
|-------|------------------|---------------------|------------------|--------------------------------|-------|-------|-------------------|------------------|------|-------|
|       |                  | SiO <sub>2</sub>    | TiO <sub>2</sub> |                                |       |       |                   |                  |      |       |
| 1     | c                | 37.92               | 1.81             | 17.91                          | 15.53 | 12.47 | 0.31              | 8.61             | 0.59 | 95.15 |
| 1     | r                | 36.97               | 1.67             | 17.15                          | 15.17 | 12.79 | 0.40              | 9.18             | 0.76 | 94.09 |
| 2     | c                | 38.31               | 1.82             | 18.35                          | 15.76 | 12.68 | 0.29              | 9.20             | 0.67 | 97.08 |
| 2     | r                | 38.20               | 1.69             | 18.56                          | 15.90 | 12.44 | 0.24              | 9.67             | 0.43 | 97.14 |
| 3     | c                | 38.12               | 1.54             | 17.42                          | 14.69 | 13.37 | 0.24              | 9.12             | 0.62 | 95.12 |
| 3     | r                | 38.15               | 1.86             | 17.68                          | 14.97 | 13.70 | 0.29              | 9.16             | <DL  | 95.81 |
| 4     | c                | 37.03               | 1.63             | 17.78                          | 14.48 | 14.07 | 0.12              | 8.25             | 0.24 | 93.60 |
| 4     | r                | 39.08               | 1.46             | 18.33                          | 15.08 | 12.71 | 0.18              | 8.92             | 0.32 | 96.08 |
| 5     | c                | 38.59               | 1.57             | 17.34                          | 14.72 | 13.04 | 0.24              | 9.17             | 0.33 | 94.99 |
| 5     | r                | 38.16               | 1.73             | 17.37                          | 14.24 | 13.34 | 0.22              | 9.65             | 0.28 | 94.98 |
| 6     | c                | 37.92               | 1.84             | 17.60                          | 15.14 | 12.94 | 0.16              | 9.28             | 0.31 | 95.19 |
| 6     | r                | 37.24               | 2.03             | 17.00                          | 14.76 | 13.23 | 0.16              | 8.95             | 0.24 | 93.61 |
| 7     | c                | 37.02               | 1.62             | 18.12                          | 16.00 | 12.77 | 0.14              | 8.47             | 0.52 | 94.67 |
| 7     | r                | 38.16               | 1.73             | 17.69                          | 15.17 | 12.24 | 0.17              | 9.33             | 0.50 | 94.99 |
| 8     | c                | 37.98               | 1.62             | 17.70                          | 14.15 | 13.61 | 0.44              | 9.21             | 0.41 | 95.11 |
| 8     | r                | 38.22               | 1.67             | 17.73                          | 14.04 | 13.45 | 0.32              | 9.39             | 0.30 | 95.11 |
| 9     | c                | 38.52               | 1.66             | 18.01                          | 15.03 | 12.91 | 0.30              | 8.85             | 0.33 | 95.61 |
| 9     | r                | 38.23               | 1.66             | 17.56                          | 14.51 | 12.94 | 0.23              | 9.03             | 0.63 | 94.79 |
| 10    | c                | 38.25               | 1.51             | 17.81                          | 15.85 | 12.32 | 0.21              | 9.14             | 0.59 | 95.68 |
| 10    | r                | 38.27               | 1.70             | 17.48                          | 15.75 | 12.51 | 0.21              | 9.74             | 0.49 | 96.15 |
| 11    | c                | 38.37               | 1.81             | 17.72                          | 14.57 | 13.23 | 0.37              | 8.73             | 0.61 | 95.40 |
| 11    | r                | 38.38               | 1.91             | 17.57                          | 14.59 | 13.06 | 0.29              | 9.18             | 0.31 | 95.29 |
| 12    | c                | 37.91               | 1.78             | 17.34                          | 15.26 | 12.96 | 0.37              | 8.96             | 0.41 | 94.99 |
| 12    | r                | 37.79               | 1.80             | 18.03                          | 15.26 | 12.60 | 0.19              | 9.57             | 0.61 | 95.85 |
| 13    | c                | 38.53               | 1.53             | 18.02                          | 15.14 | 13.68 | 0.38              | 8.92             | 0.63 | 96.83 |
| 13    | r                | 38.24               | 1.59             | 17.74                          | 14.98 | 13.71 | 0.20              | 9.41             | 0.23 | 96.10 |
| 14    | c                | 38.29               | 1.99             | 18.25                          | 14.26 | 12.92 | 0.43              | 8.72             | 0.28 | 95.14 |
| 14    | r                | 38.08               | 1.48             | 17.61                          | 14.13 | 12.95 | 0.23              | 8.73             | 0.36 | 93.56 |
| 15    | c                | 37.85               | 1.68             | 17.69                          | 15.06 | 13.17 | 0.16              | 7.99             | 0.36 | 93.96 |
| 15    | r                | 38.72               | 1.77             | 18.36                          | 14.44 | 12.92 | 0.22              | 8.56             | 0.45 | 95.44 |
| 16    | c                | 38.64               | 1.65             | 18.05                          | 14.81 | 12.89 | 0.33              | 9.12             | 0.26 | 95.76 |
| 16    | r                | 37.96               | 1.75             | 18.27                          | 14.52 | 13.28 | 0.51              | 8.98             | 0.70 | 95.97 |
| 17    | c                | 38.39               | 1.66             | 17.78                          | 14.30 | 13.29 | 0.42              | 9.30             | 0.58 | 95.71 |
| 17    | r                | 38.46               | 1.80             | 17.57                          | 14.50 | 13.38 | 0.31              | 9.54             | 0.53 | 96.08 |
| 18    | c                | 38.36               | 1.45             | 17.82                          | 13.96 | 13.59 | 0.37              | 9.36             | 0.30 | 95.21 |
| 18    | r                | 38.34               | 1.56             | 17.61                          | 13.85 | 13.97 | 0.38              | 9.04             | 0.25 | 95.00 |
| 19    | c                | 38.09               | 1.68             | 18.03                          | 14.19 | 13.65 | 0.32              | 9.33             | 0.14 | 95.43 |
| 19    | r                | 38.41               | 1.60             | 17.71                          | 13.89 | 13.41 | 0.21              | 9.40             | 0.38 | 95.01 |
| 20    | c                | 38.41               | 1.54             | 17.75                          | 14.54 | 13.47 | 0.30              | 9.24             | 0.40 | 95.66 |
| 20    | r                | 38.26               | 1.57             | 18.02                          | 14.15 | 13.54 | 0.25              | 9.13             | 0.21 | 95.13 |
| 21    | c                | 38.11               | 1.56             | 17.76                          | 14.28 | 13.48 | 0.17              | 9.39             | 0.64 | 95.39 |
| 21    | r                | 38.72               | 1.63             | 18.28                          | 14.33 | 12.80 | 0.30              | 9.52             | 0.46 | 96.05 |
| 22    | c                | 38.40               | 1.69             | 17.77                          | 14.33 | 13.78 | 0.30              | 8.77             | 0.35 | 95.39 |
| 22    | r                | 37.65               | 2.06             | 17.29                          | 14.56 | 12.51 | 0.24              | 8.96             | 0.54 | 93.81 |
| 23    | c                | 38.08               | 1.59             | 17.40                          | 15.06 | 13.13 | 0.14              | 9.48             | 0.27 | 95.14 |
| 23    | r                | 38.34               | 1.71             | 17.92                          | 14.99 | 13.06 | 0.24              | 9.60             | 0.17 | 96.03 |
| 24    | c                | 38.68               | 1.52             | 18.68                          | 14.54 | 13.37 | 0.26              | 9.51             | 0.55 | 97.11 |
| 24    | r                | 38.41               | 1.58             | 17.64                          | 14.95 | 13.47 | 0.33              | 9.19             | 0.37 | 95.94 |
| 25    | c                | 37.99               | 1.58             | 17.74                          | 15.00 | 13.00 | 0.24              | 9.56             | 0.39 | 95.50 |
| 25    | r                | 37.98               | 1.61             | 17.68                          | 15.19 | 12.87 | 0.22              | 9.05             | 0.39 | 94.99 |
| 26    | c                | 38.78               | 1.52             | 18.00                          | 13.40 | 13.44 | 0.27              | 9.56             | 0.44 | 95.42 |
| 26    | r                | 36.15               | 1.52             | 17.71                          | 14.70 | 14.81 | 0.09              | 7.44             | 0.30 | 92.71 |
| 27    | c                | 37.80               | 1.46             | 17.61                          | 14.63 | 13.35 | 0.20              | 9.20             | 0.45 | 94.69 |
| 27    | r                | 38.44               | 1.60             | 18.18                          | 14.61 | 13.73 | 0.20              | 8.69             | 0.45 | 95.90 |
| 28    | c                | 38.18               | 1.67             | 17.22                          | 15.84 | 12.68 | 0.22              | 9.02             | 0.37 | 95.20 |
| 28    | r                | 38.37               | 1.67             | 17.43                          | 15.69 | 12.73 | 0.24              | 9.03             | 0.24 | 95.40 |
| 29    | c                | 38.65               | 1.62             | 18.05                          | 14.47 | 13.44 | 0.44              | 8.90             | 0.40 | 95.97 |
| 29    | r                | 38.27               | 1.49             | 18.22                          | 14.31 | 13.20 | 0.37              | 8.56             | 0.43 | 94.86 |
| 30    | c                | 38.50               | 1.61             | 17.93                          | 14.84 | 13.28 | 0.31              | 9.03             | 0.22 | 95.72 |
| 30    | r                | 38.21               | 1.56             | 17.70                          | 14.21 | 13.71 | 0.27              | 9.62             | 0.56 | 95.84 |

Abbreviations: <DL = below detection limits, n.a. = not analyzed. CaO and MnO were ≤ DL.

<sup>1</sup> Core (c) or rim (r) of grains.

**Appendix D:** Biotite major element data (sample 08017).

| Grain | c/r <sup>1</sup> | Cation content (pfu; O=11) |       |       |       |       |       |       |       | Total |
|-------|------------------|----------------------------|-------|-------|-------|-------|-------|-------|-------|-------|
|       |                  | Si                         | Ti    | Al    | Fe    | Mg    | Na    | K     | Ba    |       |
| 1     | c                | 2.820                      | 0.101 | 1.570 | 0.966 | 1.382 | 0.045 | 0.817 | 0.017 | 7.725 |
| 1     | r                | 2.802                      | 0.095 | 1.532 | 0.961 | 1.445 | 0.059 | 0.887 | 0.023 | 7.810 |
| 2     | c                | 2.803                      | 0.100 | 1.582 | 0.964 | 1.383 | 0.041 | 0.859 | 0.019 | 7.756 |
| 2     | r                | 2.796                      | 0.093 | 1.601 | 0.973 | 1.357 | 0.035 | 0.903 | 0.012 | 7.778 |
| 3     | c                | 2.834                      | 0.086 | 1.526 | 0.913 | 1.482 | 0.034 | 0.865 | 0.018 | 7.765 |
| 3     | r                | 2.806                      | 0.103 | 1.533 | 0.921 | 1.502 | 0.042 | 0.860 | 0.004 | 7.775 |
| 4     | c                | 2.779                      | 0.092 | 1.572 | 0.909 | 1.574 | 0.017 | 0.790 | 0.007 | 7.745 |
| 4     | r                | 2.858                      | 0.080 | 1.580 | 0.922 | 1.386 | 0.026 | 0.832 | 0.009 | 7.700 |
| 5     | c                | 2.864                      | 0.087 | 1.517 | 0.914 | 1.443 | 0.034 | 0.868 | 0.010 | 7.740 |
| 5     | r                | 2.835                      | 0.097 | 1.521 | 0.885 | 1.478 | 0.031 | 0.915 | 0.008 | 7.778 |
| 6     | c                | 2.819                      | 0.103 | 1.542 | 0.941 | 1.434 | 0.024 | 0.880 | 0.009 | 7.758 |
| 6     | r                | 2.811                      | 0.115 | 1.512 | 0.932 | 1.489 | 0.023 | 0.862 | 0.007 | 7.759 |
| 7     | c                | 2.775                      | 0.091 | 1.601 | 1.003 | 1.427 | 0.021 | 0.810 | 0.015 | 7.748 |
| 7     | r                | 2.845                      | 0.097 | 1.554 | 0.946 | 1.360 | 0.024 | 0.887 | 0.015 | 7.735 |
| 8     | c                | 2.816                      | 0.090 | 1.547 | 0.877 | 1.504 | 0.063 | 0.871 | 0.012 | 7.786 |
| 8     | r                | 2.830                      | 0.093 | 1.547 | 0.869 | 1.485 | 0.045 | 0.887 | 0.009 | 7.770 |
| 9     | c                | 2.837                      | 0.092 | 1.564 | 0.926 | 1.418 | 0.043 | 0.832 | 0.010 | 7.726 |
| 9     | r                | 2.845                      | 0.093 | 1.540 | 0.903 | 1.436 | 0.033 | 0.857 | 0.018 | 7.735 |
| 10    | c                | 2.838                      | 0.084 | 1.558 | 0.984 | 1.363 | 0.030 | 0.865 | 0.017 | 7.745 |
| 10    | r                | 2.832                      | 0.095 | 1.524 | 0.975 | 1.380 | 0.031 | 0.919 | 0.014 | 7.783 |
| 11    | c                | 2.835                      | 0.101 | 1.543 | 0.900 | 1.457 | 0.053 | 0.823 | 0.018 | 7.731 |
| 11    | r                | 2.838                      | 0.106 | 1.531 | 0.902 | 1.440 | 0.042 | 0.866 | 0.009 | 7.742 |
| 12    | c                | 2.826                      | 0.100 | 1.524 | 0.951 | 1.440 | 0.054 | 0.852 | 0.012 | 7.763 |
| 12    | r                | 2.802                      | 0.100 | 1.575 | 0.946 | 1.392 | 0.027 | 0.905 | 0.018 | 7.774 |
| 13    | c                | 2.811                      | 0.084 | 1.549 | 0.924 | 1.488 | 0.054 | 0.830 | 0.018 | 7.770 |
| 13    | r                | 2.812                      | 0.088 | 1.538 | 0.921 | 1.503 | 0.028 | 0.883 | 0.007 | 7.785 |
| 14    | c                | 2.822                      | 0.110 | 1.585 | 0.879 | 1.420 | 0.061 | 0.820 | 0.008 | 7.714 |
| 14    | r                | 2.856                      | 0.083 | 1.556 | 0.886 | 1.448 | 0.033 | 0.835 | 0.010 | 7.716 |
| 15    | c                | 2.829                      | 0.094 | 1.558 | 0.941 | 1.467 | 0.024 | 0.762 | 0.010 | 7.690 |
| 15    | r                | 2.841                      | 0.098 | 1.588 | 0.886 | 1.413 | 0.031 | 0.801 | 0.013 | 7.682 |
| 16    | c                | 2.841                      | 0.091 | 1.564 | 0.911 | 1.413 | 0.047 | 0.855 | 0.008 | 7.738 |
| 16    | r                | 2.796                      | 0.097 | 1.586 | 0.894 | 1.458 | 0.073 | 0.844 | 0.020 | 7.771 |
| 17    | c                | 2.831                      | 0.092 | 1.545 | 0.882 | 1.461 | 0.060 | 0.875 | 0.017 | 7.771 |
| 17    | r                | 2.831                      | 0.100 | 1.524 | 0.893 | 1.468 | 0.044 | 0.896 | 0.015 | 7.776 |
| 18    | c                | 2.834                      | 0.081 | 1.552 | 0.863 | 1.497 | 0.053 | 0.882 | 0.009 | 7.775 |
| 18    | r                | 2.831                      | 0.086 | 1.533 | 0.855 | 1.538 | 0.054 | 0.852 | 0.007 | 7.768 |
| 19    | c                | 2.808                      | 0.093 | 1.567 | 0.875 | 1.500 | 0.046 | 0.877 | 0.004 | 7.776 |
| 19    | r                | 2.844                      | 0.089 | 1.545 | 0.860 | 1.480 | 0.030 | 0.888 | 0.011 | 7.752 |
| 20    | c                | 2.833                      | 0.085 | 1.543 | 0.897 | 1.481 | 0.043 | 0.869 | 0.012 | 7.766 |
| 20    | r                | 2.825                      | 0.087 | 1.568 | 0.874 | 1.490 | 0.036 | 0.860 | 0.006 | 7.752 |
| 21    | c                | 2.825                      | 0.087 | 1.551 | 0.885 | 1.489 | 0.024 | 0.888 | 0.019 | 7.769 |
| 21    | r                | 2.841                      | 0.090 | 1.581 | 0.879 | 1.400 | 0.043 | 0.891 | 0.013 | 7.745 |
| 22    | c                | 2.829                      | 0.094 | 1.543 | 0.883 | 1.513 | 0.043 | 0.824 | 0.010 | 7.740 |
| 22    | r                | 2.836                      | 0.117 | 1.535 | 0.917 | 1.405 | 0.034 | 0.861 | 0.016 | 7.726 |
| 23    | c                | 2.832                      | 0.089 | 1.525 | 0.937 | 1.456 | 0.020 | 0.900 | 0.008 | 7.775 |
| 23    | r                | 2.820                      | 0.095 | 1.554 | 0.922 | 1.432 | 0.035 | 0.901 | 0.005 | 7.773 |
| 24    | c                | 2.811                      | 0.083 | 1.600 | 0.884 | 1.448 | 0.037 | 0.882 | 0.016 | 7.765 |
| 24    | r                | 2.828                      | 0.088 | 1.531 | 0.920 | 1.478 | 0.047 | 0.863 | 0.011 | 7.775 |
| 25    | c                | 2.820                      | 0.088 | 1.552 | 0.931 | 1.439 | 0.035 | 0.905 | 0.011 | 7.784 |
| 25    | r                | 2.827                      | 0.090 | 1.551 | 0.946 | 1.428 | 0.032 | 0.859 | 0.011 | 7.753 |
| 26    | c                | 2.852                      | 0.084 | 1.560 | 0.824 | 1.473 | 0.039 | 0.897 | 0.013 | 7.750 |
| 26    | r                | 2.735                      | 0.086 | 1.579 | 0.930 | 1.670 | 0.013 | 0.718 | 0.009 | 7.753 |
| 27    | c                | 2.822                      | 0.082 | 1.549 | 0.913 | 1.486 | 0.028 | 0.876 | 0.013 | 7.773 |
| 27    | r                | 2.816                      | 0.088 | 1.570 | 0.895 | 1.499 | 0.028 | 0.812 | 0.013 | 7.729 |
| 28    | c                | 2.843                      | 0.094 | 1.511 | 0.987 | 1.408 | 0.032 | 0.857 | 0.011 | 7.749 |
| 28    | r                | 2.845                      | 0.093 | 1.523 | 0.973 | 1.407 | 0.034 | 0.854 | 0.007 | 7.744 |
| 29    | c                | 2.832                      | 0.089 | 1.559 | 0.887 | 1.468 | 0.063 | 0.832 | 0.011 | 7.746 |
| 29    | r                | 2.828                      | 0.083 | 1.587 | 0.884 | 1.454 | 0.054 | 0.807 | 0.013 | 7.724 |
| 30    | c                | 2.830                      | 0.089 | 1.553 | 0.912 | 1.455 | 0.044 | 0.847 | 0.006 | 7.746 |
| 30    | r                | 2.819                      | 0.087 | 1.539 | 0.877 | 1.508 | 0.038 | 0.905 | 0.016 | 7.796 |

<sup>1</sup> Core (c) or rim (r) of grains.

**Appendix D:** Biotite major element data (sample 09015).

| Grain | c/r <sup>1</sup> | Oxide content (wt%) |                  | Al <sub>2</sub> O <sub>3</sub> | FeO   | MgO   | Na <sub>2</sub> O | K <sub>2</sub> O | BaO  | Total |
|-------|------------------|---------------------|------------------|--------------------------------|-------|-------|-------------------|------------------|------|-------|
|       |                  | SiO <sub>2</sub>    | TiO <sub>2</sub> |                                |       |       |                   |                  |      |       |
| 1     | c                | 36.62               | 1.85             | 18.63                          | 16.38 | 11.06 | 0.23              | 8.67             | 0.23 | 93.67 |
| 1     | r                | 37.61               | 1.51             | 18.39                          | 16.55 | 11.20 | 0.37              | 8.63             | <DL  | 94.26 |
| 2     | c                | 37.70               | 1.60             | 18.26                          | 16.61 | 11.87 | 0.37              | 8.90             | 0.32 | 95.62 |
| 2     | r                | 37.43               | 1.59             | 18.46                          | 16.52 | 11.82 | 0.29              | 8.73             | 0.34 | 95.18 |
| 3     | c                | 37.29               | 1.75             | 18.54                          | 16.55 | 11.47 | 0.31              | 8.59             | 0.23 | 94.73 |
| 3     | r                | 37.31               | 1.96             | 18.29                          | 17.17 | 11.51 | 0.26              | 8.70             | <DL  | 95.20 |
| 4     | c                | 37.71               | 1.71             | 18.26                          | 16.70 | 11.39 | 0.34              | 8.76             | 0.16 | 95.03 |
| 4     | r                | 38.39               | 1.42             | 18.97                          | 15.90 | 10.85 | 0.24              | 8.62             | <DL  | 94.39 |
| 5     | c                | 37.97               | 1.63             | 17.95                          | 16.78 | 11.44 | 0.38              | 8.76             | 0.23 | 95.13 |
| 5     | r                | 38.20               | 1.41             | 18.24                          | 16.27 | 11.61 | 0.28              | 8.81             | <DL  | 94.82 |
| 6     | c                | 37.33               | 1.84             | 18.56                          | 16.65 | 11.05 | 0.22              | 8.63             | <DL  | 94.28 |
| 6     | r                | 37.68               | 1.90             | 18.26                          | 16.99 | 10.85 | 0.26              | 8.37             | <DL  | 94.31 |
| 7     | c                | 37.61               | 1.66             | 18.54                          | 17.03 | 11.57 | 0.37              | 8.66             | <DL  | 95.44 |
| 7     | r                | 38.16               | 1.78             | 18.26                          | 16.46 | 11.29 | 0.19              | 8.83             | 0.38 | 95.35 |
| 8     | c                | 37.90               | 1.78             | 18.37                          | 17.10 | 11.13 | 0.26              | 9.09             | 0.34 | 95.97 |
| 8     | r                | 35.02               | 1.77             | 16.93                          | 15.68 | 9.94  | 0.31              | 8.02             | 0.19 | 87.86 |
| 9     | c                | 38.18               | 1.60             | 17.95                          | 16.93 | 11.00 | 0.36              | 8.68             | 0.30 | 95.00 |
| 9     | r                | 38.06               | 1.03             | 18.43                          | 17.03 | 12.04 | 0.23              | 9.10             | 0.16 | 96.07 |
| 10    | c                | 38.87               | 1.58             | 18.05                          | 16.40 | 11.64 | 0.27              | 8.64             | 0.36 | 95.81 |
| 10    | r                | 39.38               | 2.26             | 18.15                          | 15.94 | 10.99 | 0.25              | 8.80             | 0.45 | 96.22 |
| 11    | c                | 37.49               | 1.87             | 18.29                          | 17.35 | 11.09 | 0.24              | 8.52             | <DL  | 94.85 |
| 11    | r                | 37.56               | 1.72             | 18.41                          | 17.17 | 10.90 | 0.26              | 8.79             | <DL  | 94.81 |
| 12    | c                | 38.82               | 1.65             | 18.48                          | 16.62 | 11.53 | 0.30              | 8.85             | <DL  | 96.26 |
| 12    | r                | 38.90               | 1.72             | 18.60                          | 16.47 | 11.96 | 0.30              | 8.89             | 0.28 | 97.12 |
| 13    | c                | 37.87               | 1.67             | 18.56                          | 16.39 | 11.52 | 0.22              | 8.53             | <DL  | 94.76 |
| 13    | r                | 38.47               | 1.78             | 18.39                          | 16.46 | 11.43 | 0.23              | 8.66             | 0.20 | 95.62 |
| 14    | c                | 38.27               | 1.84             | 18.12                          | 17.06 | 11.32 | 0.18              | 8.72             | 0.18 | 95.69 |
| 14    | r                | 34.90               | 2.11             | 17.55                          | 17.08 | 11.28 | 0.25              | 8.71             | <DL  | 91.88 |
| 15    | c                | 38.02               | 1.67             | 18.50                          | 16.38 | 11.25 | 0.23              | 8.94             | 0.15 | 95.14 |
| 15    | r                | 37.91               | 1.87             | 18.81                          | 16.30 | 10.54 | 0.32              | 8.93             | 0.27 | 94.95 |
| 16    | c                | 37.42               | 1.98             | 18.35                          | 16.62 | 11.24 | 0.31              | 8.69             | 0.35 | 94.96 |
| 16    | r                | 37.73               | 1.86             | 17.97                          | 16.96 | 11.69 | 0.22              | 8.69             | 0.30 | 95.42 |
| 17    | c                | 38.27               | 1.75             | 18.60                          | 17.28 | 11.02 | 0.34              | 8.95             | <DL  | 96.21 |
| 17    | r                | 36.94               | 1.74             | 18.29                          | 16.86 | 11.21 | 0.31              | 8.75             | <DL  | 94.10 |
| 18    | c                | 37.60               | 1.91             | 17.83                          | 16.95 | 11.34 | 0.27              | 8.67             | 0.34 | 94.90 |
| 18    | r                | 35.78               | 1.86             | 17.64                          | 15.95 | 11.51 | 0.30              | 8.92             | <DL  | 91.96 |
| 19    | c                | 37.27               | 2.04             | 17.62                          | 16.69 | 11.27 | 0.25              | 8.60             | <DL  | 93.74 |
| 19    | r                | 38.78               | 1.56             | 18.36                          | 16.71 | 11.51 | 0.24              | 8.77             | 0.21 | 96.13 |
| 20    | c                | 36.99               | 1.77             | 18.40                          | 17.29 | 10.96 | 0.28              | 8.79             | 0.24 | 94.72 |
| 20    | r                | 36.52               | 1.31             | 18.17                          | 17.39 | 11.71 | 0.29              | 8.94             | <DL  | 94.32 |
| 21    | c                | 38.08               | 1.84             | 18.40                          | 16.74 | 11.59 | 0.32              | 8.85             | 0.23 | 96.04 |
| 21    | r                | 37.40               | 2.22             | 18.05                          | 16.87 | 10.99 | 0.21              | 8.80             | 0.39 | 94.92 |
| 22    | c                | 38.52               | 1.53             | 17.95                          | 16.89 | 11.52 | 0.40              | 8.80             | 0.16 | 95.76 |
| 22    | r                | 37.07               | 1.34             | 17.99                          | 16.92 | 11.78 | 0.21              | 8.82             | <DL  | 94.13 |
| 23    | c                | 38.42               | 1.72             | 18.66                          | 16.70 | 10.94 | 0.27              | 8.53             | 0.35 | 95.59 |
| 23    | r                | 37.81               | 1.81             | 18.37                          | 16.78 | 11.31 | 0.32              | 8.58             | <DL  | 94.98 |
| 24    | c                | 37.40               | 1.79             | 17.81                          | 17.27 | 11.47 | 0.21              | 8.70             | 0.43 | 95.09 |
| 24    | r                | 36.81               | 1.84             | 17.84                          | 17.19 | 11.75 | 0.24              | 8.88             | 0.32 | 94.88 |
| 25    | c                | 38.20               | 1.82             | 18.18                          | 16.59 | 11.38 | 0.21              | 8.43             | 0.49 | 95.29 |
| 25    | r                | 37.30               | 1.82             | 18.46                          | 17.64 | 11.67 | 0.21              | 8.22             | 0.34 | 95.66 |
| 26    | c                | 38.10               | 1.90             | 18.08                          | 17.24 | 11.14 | 0.28              | 8.99             | 0.20 | 95.93 |
| 26    | r                | 37.94               | 1.51             | 18.03                          | 16.63 | 11.57 | 0.26              | 8.87             | <DL  | 94.81 |
| 27    | c                | 37.90               | 1.80             | 18.00                          | 16.67 | 11.55 | 0.25              | 8.74             | 0.20 | 95.10 |
| 27    | r                | 38.59               | 1.61             | 18.07                          | 16.43 | 11.41 | 0.26              | 8.80             | 0.21 | 95.37 |
| 28    | c                | 37.86               | 1.78             | 18.33                          | 16.89 | 11.00 | 0.27              | 8.70             | <DL  | 94.83 |
| 28    | r                | 37.66               | 1.96             | 18.02                          | 17.49 | 10.68 | 0.26              | 9.01             | 0.39 | 95.48 |
| 29    | c                | 38.38               | 1.75             | 17.91                          | 16.70 | 11.46 | 0.33              | 8.79             | 0.41 | 95.74 |
| 29    | r                | 39.04               | 1.80             | 18.01                          | 17.32 | 11.19 | 0.30              | 8.99             | 0.16 | 96.81 |
| 30    | c                | 38.30               | 1.66             | 18.50                          | 16.58 | 11.17 | 0.30              | 8.87             | <DL  | 95.37 |
| 30    | r                | 38.62               | 1.51             | 18.19                          | 16.62 | 11.20 | 0.27              | 8.71             | <DL  | 95.11 |

Abbreviations: <DL = below detection limits, n.a. = not analyzed. CaO and MnO were ≤ DL.

<sup>1</sup> Core (c) or rim (r) of grains.

**Appendix D:** Biotite major element data (sample 09015).

| Grain | c/r <sup>1</sup> | Cation content (pfu; O=11) |       |       |       |       |       |       |       | Total |
|-------|------------------|----------------------------|-------|-------|-------|-------|-------|-------|-------|-------|
|       |                  | Si                         | Ti    | Al    | Fe    | Mg    | Na    | K     | Ba    |       |
| 1     | c                | 2.824                      | 0.085 | 1.628 | 1.039 | 1.254 | 0.053 | 0.827 | 0.001 | 7.716 |
| 1     | r                | 2.804                      | 0.089 | 1.601 | 1.033 | 1.316 | 0.053 | 0.845 | 0.009 | 7.753 |
| 2     | c                | 2.792                      | 0.089 | 1.623 | 1.031 | 1.315 | 0.042 | 0.831 | 0.010 | 7.741 |
| 2     | r                | 2.794                      | 0.099 | 1.637 | 1.037 | 1.281 | 0.045 | 0.821 | 0.007 | 7.722 |
| 3     | c                | 2.787                      | 0.110 | 1.610 | 1.073 | 1.282 | 0.038 | 0.829 | 0.001 | 7.731 |
| 3     | r                | 2.817                      | 0.096 | 1.608 | 1.043 | 1.268 | 0.049 | 0.835 | 0.005 | 7.724 |
| 4     | c                | 2.860                      | 0.080 | 1.666 | 0.991 | 1.205 | 0.035 | 0.819 | 0.000 | 7.654 |
| 4     | r                | 2.836                      | 0.091 | 1.580 | 1.048 | 1.274 | 0.054 | 0.835 | 0.007 | 7.727 |
| 5     | c                | 2.845                      | 0.079 | 1.601 | 1.013 | 1.289 | 0.040 | 0.837 | 0.000 | 7.712 |
| 5     | r                | 2.803                      | 0.104 | 1.643 | 1.046 | 1.237 | 0.032 | 0.827 | 0.003 | 7.701 |
| 6     | c                | 2.827                      | 0.107 | 1.614 | 1.066 | 1.213 | 0.037 | 0.801 | 0.001 | 7.677 |
| 6     | r                | 2.797                      | 0.093 | 1.625 | 1.059 | 1.283 | 0.053 | 0.822 | 0.003 | 7.734 |
| 7     | c                | 2.839                      | 0.100 | 1.601 | 1.024 | 1.252 | 0.027 | 0.838 | 0.011 | 7.693 |
| 7     | r                | 2.815                      | 0.099 | 1.608 | 1.062 | 1.232 | 0.037 | 0.861 | 0.010 | 7.730 |
| 8     | c                | 2.831                      | 0.108 | 1.613 | 1.060 | 1.198 | 0.048 | 0.827 | 0.006 | 7.692 |
| 8     | r                | 2.855                      | 0.090 | 1.582 | 1.059 | 1.226 | 0.053 | 0.828 | 0.009 | 7.703 |
| 9     | c                | 2.818                      | 0.057 | 1.608 | 1.055 | 1.329 | 0.033 | 0.860 | 0.004 | 7.767 |
| 9     | r                | 2.869                      | 0.088 | 1.570 | 1.012 | 1.281 | 0.039 | 0.814 | 0.010 | 7.684 |
| 10    | c                | 2.887                      | 0.125 | 1.568 | 0.977 | 1.201 | 0.036 | 0.823 | 0.013 | 7.633 |
| 10    | r                | 2.807                      | 0.105 | 1.614 | 1.086 | 1.238 | 0.035 | 0.814 | 0.003 | 7.705 |
| 11    | c                | 2.816                      | 0.097 | 1.627 | 1.077 | 1.218 | 0.037 | 0.841 | 0.000 | 7.713 |
| 11    | r                | 2.848                      | 0.091 | 1.598 | 1.020 | 1.261 | 0.043 | 0.828 | 0.002 | 7.697 |
| 12    | c                | 2.833                      | 0.094 | 1.596 | 1.003 | 1.298 | 0.043 | 0.826 | 0.008 | 7.707 |
| 12    | r                | 2.822                      | 0.094 | 1.630 | 1.021 | 1.280 | 0.032 | 0.811 | 0.000 | 7.690 |
| 13    | c                | 2.844                      | 0.099 | 1.602 | 1.018 | 1.260 | 0.033 | 0.817 | 0.006 | 7.681 |
| 13    | r                | 2.837                      | 0.103 | 1.583 | 1.058 | 1.251 | 0.025 | 0.825 | 0.005 | 7.692 |
| 14    | c                | 2.722                      | 0.124 | 1.613 | 1.114 | 1.312 | 0.038 | 0.867 | 0.001 | 7.798 |
| 14    | r                | 2.831                      | 0.093 | 1.624 | 1.020 | 1.249 | 0.033 | 0.849 | 0.004 | 7.705 |
| 15    | c                | 2.829                      | 0.105 | 1.654 | 1.017 | 1.173 | 0.046 | 0.850 | 0.008 | 7.686 |
| 15    | r                | 2.802                      | 0.112 | 1.619 | 1.041 | 1.255 | 0.045 | 0.830 | 0.010 | 7.714 |
| 16    | c                | 2.811                      | 0.104 | 1.578 | 1.057 | 1.298 | 0.031 | 0.826 | 0.009 | 7.723 |
| 16    | r                | 2.824                      | 0.097 | 1.618 | 1.066 | 1.212 | 0.049 | 0.843 | 0.003 | 7.715 |
| 17    | c                | 2.790                      | 0.099 | 1.628 | 1.065 | 1.262 | 0.045 | 0.843 | 0.002 | 7.740 |
| 17    | r                | 2.819                      | 0.108 | 1.576 | 1.063 | 1.268 | 0.039 | 0.829 | 0.010 | 7.718 |
| 18    | c                | 2.769                      | 0.108 | 1.609 | 1.032 | 1.328 | 0.045 | 0.881 | 0.001 | 7.780 |
| 18    | r                | 2.822                      | 0.116 | 1.573 | 1.057 | 1.272 | 0.036 | 0.831 | 0.001 | 7.709 |
| 19    | c                | 2.855                      | 0.086 | 1.593 | 1.029 | 1.263 | 0.034 | 0.824 | 0.006 | 7.691 |
| 19    | r                | 2.787                      | 0.100 | 1.634 | 1.090 | 1.231 | 0.041 | 0.845 | 0.007 | 7.738 |
| 20    | c                | 2.768                      | 0.074 | 1.623 | 1.102 | 1.323 | 0.042 | 0.864 | 0.000 | 7.799 |
| 20    | r                | 2.814                      | 0.102 | 1.603 | 1.035 | 1.277 | 0.045 | 0.834 | 0.007 | 7.722 |
| 21    | c                | 2.807                      | 0.125 | 1.597 | 1.059 | 1.230 | 0.030 | 0.843 | 0.011 | 7.705 |
| 21    | r                | 2.853                      | 0.085 | 1.567 | 1.046 | 1.272 | 0.057 | 0.832 | 0.005 | 7.722 |
| 22    | c                | 2.801                      | 0.076 | 1.602 | 1.069 | 1.327 | 0.030 | 0.850 | 0.002 | 7.761 |
| 22    | r                | 2.844                      | 0.096 | 1.628 | 1.034 | 1.207 | 0.039 | 0.806 | 0.010 | 7.667 |
| 23    | c                | 2.818                      | 0.101 | 1.614 | 1.046 | 1.257 | 0.046 | 0.816 | 0.000 | 7.703 |
| 23    | r                | 2.808                      | 0.101 | 1.576 | 1.084 | 1.284 | 0.031 | 0.833 | 0.013 | 7.734 |
| 24    | c                | 2.775                      | 0.104 | 1.585 | 1.084 | 1.321 | 0.036 | 0.854 | 0.009 | 7.772 |
| 24    | r                | 2.841                      | 0.102 | 1.594 | 1.032 | 1.262 | 0.030 | 0.800 | 0.014 | 7.675 |
| 25    | c                | 2.777                      | 0.102 | 1.620 | 1.098 | 1.295 | 0.031 | 0.781 | 0.010 | 7.716 |
| 25    | r                | 2.828                      | 0.106 | 1.581 | 1.070 | 1.232 | 0.040 | 0.851 | 0.006 | 7.720 |
| 26    | c                | 2.836                      | 0.085 | 1.589 | 1.040 | 1.289 | 0.038 | 0.846 | 0.004 | 7.727 |
| 26    | r                | 2.828                      | 0.101 | 1.583 | 1.040 | 1.285 | 0.036 | 0.832 | 0.006 | 7.713 |
| 27    | c                | 2.863                      | 0.090 | 1.580 | 1.019 | 1.262 | 0.037 | 0.833 | 0.006 | 7.693 |
| 27    | r                | 2.828                      | 0.100 | 1.614 | 1.055 | 1.225 | 0.038 | 0.829 | 0.002 | 7.698 |
| 28    | c                | 2.821                      | 0.110 | 1.591 | 1.095 | 1.192 | 0.038 | 0.861 | 0.012 | 7.723 |
| 28    | r                | 2.848                      | 0.098 | 1.566 | 1.036 | 1.268 | 0.048 | 0.832 | 0.012 | 7.711 |
| 29    | c                | 2.865                      | 0.099 | 1.558 | 1.063 | 1.224 | 0.042 | 0.842 | 0.005 | 7.698 |
| 29    | r                | 2.840                      | 0.092 | 1.617 | 1.028 | 1.235 | 0.042 | 0.839 | 0.000 | 7.699 |
| 30    | c                | 2.869                      | 0.084 | 1.592 | 1.032 | 1.240 | 0.039 | 0.825 | 0.000 | 7.683 |
| 30    | r                | 2.87                       | 0.084 | 1.59  | 1.033 | 1.240 | 0.039 | 0.825 | 0.000 | 7.68  |

<sup>1</sup> Core (c) or rim (r) of grains.



**Appendix D:** Biotite major element data (sample 09019).

| Grain | c/r <sup>1</sup> | Oxide content (wt%) |                  | Al <sub>2</sub> O <sub>3</sub> | FeO   | MgO   | Na <sub>2</sub> O | K <sub>2</sub> O | BaO  | Total |
|-------|------------------|---------------------|------------------|--------------------------------|-------|-------|-------------------|------------------|------|-------|
|       |                  | SiO <sub>2</sub>    | TiO <sub>2</sub> |                                |       |       |                   |                  |      |       |
| 1     | c                | 39.01               | 1.83             | 17.36                          | 16.56 | 11.57 | 0.23              | 9.24             | <DL  | 95.80 |
| 1     | r                | 38.56               | 2.05             | 17.05                          | 16.36 | 11.36 | 0.22              | 9.35             | 0.42 | 95.37 |
| 2     | c                | 38.54               | 1.65             | 17.37                          | 16.48 | 11.91 | 0.24              | 8.51             | 0.37 | 95.07 |
| 2     | r                | 39.21               | 1.92             | 17.50                          | 16.98 | 11.44 | 0.21              | 9.13             | 0.43 | 96.82 |
| 3     | c                | 38.69               | 1.64             | 17.26                          | 16.85 | 11.86 | 0.22              | 9.12             | 0.52 | 96.16 |
| 3     | r                | 37.94               | 1.55             | 16.69                          | 16.72 | 12.13 | 0.25              | 9.29             | 0.46 | 95.02 |
| 4     | c                | 38.63               | 1.79             | 16.95                          | 16.79 | 11.68 | 0.28              | 9.16             | 0.14 | 95.42 |
| 4     | r                | 37.39               | 1.93             | 16.73                          | 16.60 | 11.95 | 0.30              | 9.36             | <DL  | 94.26 |
| 5     | c                | 38.48               | 1.82             | 16.67                          | 16.88 | 11.45 | 0.25              | 9.02             | 0.22 | 94.79 |
| 5     | r                | 36.85               | 1.76             | 16.48                          | 16.61 | 11.68 | 0.22              | 9.20             | <DL  | 92.80 |
| 6     | c                | 39.12               | 1.75             | 17.68                          | 16.42 | 11.94 | 0.24              | 9.32             | <DL  | 96.47 |
| 6     | r                | 38.78               | 1.64             | 17.34                          | 16.36 | 11.72 | 0.23              | 9.06             | 0.38 | 95.50 |
| 7     | c                | 38.19               | 1.71             | 17.60                          | 15.84 | 12.15 | 0.30              | 8.67             | 0.33 | 94.78 |
| 7     | r                | 38.92               | 1.78             | 17.92                          | 16.41 | 11.13 | 0.22              | 9.65             | <DL  | 96.03 |
| 8     | c                | 38.74               | 1.69             | 17.40                          | 16.45 | 11.31 | 0.27              | 9.18             | 0.17 | 95.20 |
| 8     | r                | 38.05               | 1.57             | 16.68                          | 16.49 | 12.07 | 0.21              | 9.29             | 0.24 | 94.60 |
| 9     | c                | 39.09               | 1.91             | 17.17                          | 17.07 | 11.06 | 0.13              | 9.29             | <DL  | 95.72 |
| 9     | r                | 38.32               | 1.84             | 17.36                          | 16.80 | 11.88 | 0.23              | 9.05             | <DL  | 95.48 |
| 10    | c                | 38.88               | 1.93             | 17.03                          | 17.04 | 11.87 | 0.29              | 9.22             | 0.15 | 96.41 |
| 10    | r                | 38.63               | 1.70             | 16.95                          | 17.25 | 12.13 | 0.22              | 9.07             | <DL  | 95.95 |
| 11    | c                | 38.49               | 1.80             | 16.91                          | 17.00 | 11.74 | 0.20              | 9.12             | <DL  | 95.26 |
| 11    | r                | 38.10               | 1.73             | 16.96                          | 16.60 | 11.76 | 0.27              | 9.15             | 0.26 | 94.83 |
| 12    | c                | 38.78               | 1.62             | 17.26                          | 16.96 | 12.23 | 0.25              | 9.10             | 0.18 | 96.38 |
| 12    | r                | 38.14               | 2.04             | 17.72                          | 16.83 | 11.55 | 0.28              | 9.14             | <DL  | 95.70 |
| 13    | c                | 38.53               | 1.82             | 17.36                          | 16.89 | 11.94 | 0.28              | 9.05             | <DL  | 95.87 |
| 13    | r                | 39.13               | 1.64             | 17.36                          | 17.01 | 12.05 | 0.25              | 9.25             | 0.22 | 96.90 |
| 14    | c                | 38.11               | 1.80             | 16.77                          | 16.93 | 11.90 | 0.28              | 9.30             | <DL  | 95.09 |
| 14    | r                | 37.95               | 1.77             | 16.70                          | 17.51 | 11.82 | 0.27              | 9.14             | 0.20 | 95.37 |
| 15    | c                | 38.97               | 1.91             | 16.95                          | 16.84 | 12.02 | 0.33              | 9.09             | <DL  | 96.11 |
| 15    | r                | 38.46               | 2.14             | 16.93                          | 16.20 | 11.77 | 0.28              | 9.44             | 0.25 | 95.46 |
| 16    | c                | 37.85               | 2.08             | 17.35                          | 16.66 | 12.38 | 0.14              | 9.41             | 0.47 | 96.34 |
| 16    | r                | 38.64               | 1.92             | 17.57                          | 16.29 | 12.11 | 0.12              | 9.27             | 0.18 | 96.10 |
| 17    | c                | 38.70               | 1.82             | 16.86                          | 16.85 | 11.80 | 0.27              | 9.34             | <DL  | 95.64 |
| 17    | r                | 39.30               | 1.81             | 16.73                          | 16.69 | 11.70 | 0.22              | 9.16             | <DL  | 95.61 |
| 18    | c                | 38.16               | 1.64             | 17.27                          | 17.16 | 11.70 | 0.30              | 9.14             | 0.36 | 95.73 |
| 18    | r                | 38.53               | 1.80             | 17.02                          | 16.58 | 11.19 | 0.30              | 8.36             | <DL  | 93.78 |
| 19    | c                | 38.42               | 1.96             | 17.06                          | 17.02 | 11.59 | 0.18              | 9.27             | 0.24 | 95.74 |
| 19    | r                | 37.65               | 1.83             | 16.74                          | 16.85 | 11.60 | 0.16              | 9.74             | <DL  | 94.57 |
| 20    | c                | 38.80               | 1.52             | 17.51                          | 17.44 | 11.73 | 0.28              | 9.40             | <DL  | 96.68 |
| 20    | r                | 38.44               | 1.57             | 16.68                          | 17.16 | 12.12 | 0.15              | 9.10             | 0.16 | 95.38 |
| 21    | c                | 38.42               | 1.77             | 17.35                          | 16.97 | 11.54 | 0.28              | 8.97             | <DL  | 95.30 |
| 21    | r                | 38.65               | 1.82             | 17.48                          | 16.98 | 11.32 | 0.22              | 9.44             | <DL  | 95.91 |
| 22    | c                | 38.53               | 1.91             | 16.60                          | 16.81 | 12.04 | 0.27              | 9.01             | <DL  | 95.17 |
| 22    | r                | 39.55               | 1.68             | 17.32                          | 16.67 | 11.87 | 0.20              | 9.30             | <DL  | 96.59 |
| 23    | c                | 39.02               | 1.99             | 16.66                          | 16.96 | 11.96 | 0.24              | 9.24             | 0.16 | 96.23 |
| 23    | r                | 38.13               | 1.88             | 16.50                          | 16.96 | 12.49 | 0.22              | 9.30             | 0.21 | 95.69 |
| 24    | c                | 38.53               | 2.00             | 16.87                          | 17.08 | 11.79 | 0.16              | 8.80             | 0.26 | 95.48 |
| 24    | r                | 37.79               | 1.77             | 17.43                          | 16.09 | 11.89 | 0.19              | 7.07             | 0.25 | 92.48 |
| 25    | c                | 38.49               | 1.78             | 16.81                          | 16.81 | 11.71 | 0.28              | 9.39             | 0.46 | 95.72 |
| 25    | r                | 38.50               | 1.67             | 17.20                          | 17.29 | 12.01 | 0.17              | 9.11             | 0.17 | 96.12 |
| 26    | c                | 39.13               | 1.90             | 16.82                          | 17.24 | 11.69 | 0.27              | 9.15             | 0.29 | 96.49 |
| 26    | r                | 38.52               | 2.05             | 16.63                          | 17.25 | 11.77 | 0.22              | 8.92             | <DL  | 95.36 |
| 27    | c                | 38.73               | 2.06             | 17.10                          | 16.83 | 11.74 | 0.16              | 9.29             | 0.15 | 96.06 |
| 27    | r                | 38.54               | 1.99             | 16.65                          | 16.62 | 11.73 | 0.22              | 9.31             | <DL  | 95.06 |
| 28    | c                | 38.92               | 1.67             | 17.22                          | 17.19 | 11.75 | 0.27              | 9.27             | 0.26 | 96.55 |
| 28    | r                | 38.67               | 1.71             | 16.20                          | 16.88 | 11.86 | 0.22              | 9.35             | <DL  | 94.89 |
| 29    | c                | 38.66               | 2.10             | 16.35                          | 16.71 | 11.89 | 0.29              | 9.10             | <DL  | 95.10 |
| 29    | r                | 38.04               | 2.07             | 16.11                          | 16.37 | 11.55 | 0.26              | 8.67             | 0.19 | 93.26 |
| 30    | c                | 37.52               | 1.94             | 16.66                          | 17.53 | 11.39 | 0.24              | 9.14             | 0.14 | 94.56 |
| 30    | r                | 38.38               | 1.97             | 16.82                          | 17.22 | 11.45 | 0.26              | 8.36             | 0.30 | 94.75 |

Abbreviations: <DL = below detection limits, n.a. = not analyzed. CaO and MnO were ≤ DL.

<sup>1</sup> Core (c) or rim (r) of grains.

**Appendix D:** Biotite major element data (sample 09019).

| Grain | c/r <sup>1</sup> | Cation content (pfu; O=11) |       |       |       |       |       |       |       | Total |
|-------|------------------|----------------------------|-------|-------|-------|-------|-------|-------|-------|-------|
|       |                  | Si                         | Ti    | Al    | Fe    | Mg    | Na    | K     | Ba    |       |
| 1     | c                | 2.885                      | 0.102 | 1.513 | 1.024 | 1.276 | 0.033 | 0.872 | 0.001 | 7.708 |
| 1     | r                | 2.879                      | 0.115 | 1.500 | 1.021 | 1.264 | 0.032 | 0.891 | 0.012 | 7.717 |
| 2     | c                | 2.870                      | 0.093 | 1.525 | 1.026 | 1.322 | 0.035 | 0.809 | 0.011 | 7.696 |
| 2     | r                | 2.879                      | 0.106 | 1.515 | 1.043 | 1.252 | 0.030 | 0.855 | 0.012 | 7.699 |
| 3     | c                | 2.868                      | 0.092 | 1.508 | 1.044 | 1.310 | 0.031 | 0.862 | 0.015 | 7.734 |
| 3     | r                | 2.855                      | 0.088 | 1.480 | 1.052 | 1.361 | 0.036 | 0.892 | 0.014 | 7.781 |
| 4     | c                | 2.879                      | 0.100 | 1.489 | 1.046 | 1.298 | 0.040 | 0.871 | 0.004 | 7.731 |
| 4     | r                | 2.829                      | 0.110 | 1.492 | 1.050 | 1.348 | 0.044 | 0.904 | 0.003 | 7.788 |
| 5     | c                | 2.888                      | 0.103 | 1.475 | 1.060 | 1.281 | 0.036 | 0.864 | 0.006 | 7.722 |
| 5     | r                | 2.836                      | 0.102 | 1.495 | 1.069 | 1.340 | 0.033 | 0.903 | 0.000 | 7.783 |
| 6     | c                | 2.870                      | 0.097 | 1.529 | 1.007 | 1.306 | 0.033 | 0.872 | 0.000 | 7.721 |
| 6     | r                | 2.882                      | 0.092 | 1.519 | 1.017 | 1.299 | 0.033 | 0.859 | 0.011 | 7.713 |
| 7     | c                | 2.847                      | 0.096 | 1.547 | 0.988 | 1.350 | 0.043 | 0.825 | 0.009 | 7.717 |
| 7     | r                | 2.874                      | 0.099 | 1.560 | 1.013 | 1.225 | 0.032 | 0.909 | 0.002 | 7.717 |
| 8     | c                | 2.886                      | 0.095 | 1.528 | 1.025 | 1.256 | 0.038 | 0.872 | 0.005 | 7.711 |
| 8     | r                | 2.867                      | 0.089 | 1.481 | 1.039 | 1.356 | 0.031 | 0.893 | 0.007 | 7.765 |
| 9     | c                | 2.897                      | 0.106 | 1.500 | 1.058 | 1.222 | 0.019 | 0.878 | 0.000 | 7.693 |
| 9     | r                | 2.849                      | 0.103 | 1.521 | 1.045 | 1.317 | 0.033 | 0.858 | 0.001 | 7.732 |
| 10    | c                | 2.871                      | 0.107 | 1.482 | 1.052 | 1.307 | 0.042 | 0.869 | 0.004 | 7.736 |
| 10    | r                | 2.864                      | 0.095 | 1.481 | 1.070 | 1.341 | 0.031 | 0.858 | 0.003 | 7.745 |
| 11    | c                | 2.872                      | 0.101 | 1.487 | 1.061 | 1.306 | 0.028 | 0.868 | 0.001 | 7.731 |
| 11    | r                | 2.862                      | 0.098 | 1.502 | 1.043 | 1.317 | 0.039 | 0.877 | 0.008 | 7.747 |
| 12    | c                | 2.859                      | 0.090 | 1.500 | 1.046 | 1.344 | 0.036 | 0.856 | 0.005 | 7.747 |
| 12    | r                | 2.831                      | 0.114 | 1.550 | 1.045 | 1.278 | 0.041 | 0.865 | 0.000 | 7.733 |
| 13    | c                | 2.851                      | 0.101 | 1.514 | 1.045 | 1.317 | 0.040 | 0.854 | 0.002 | 7.736 |
| 13    | r                | 2.871                      | 0.091 | 1.501 | 1.044 | 1.318 | 0.035 | 0.866 | 0.006 | 7.738 |
| 14    | c                | 2.856                      | 0.101 | 1.481 | 1.061 | 1.329 | 0.040 | 0.889 | 0.000 | 7.767 |
| 14    | r                | 2.848                      | 0.100 | 1.477 | 1.099 | 1.322 | 0.040 | 0.875 | 0.006 | 7.771 |
| 15    | c                | 2.877                      | 0.106 | 1.475 | 1.040 | 1.323 | 0.047 | 0.856 | 0.003 | 7.731 |
| 15    | r                | 2.864                      | 0.120 | 1.486 | 1.009 | 1.307 | 0.040 | 0.897 | 0.007 | 7.741 |
| 16    | c                | 2.808                      | 0.116 | 1.517 | 1.034 | 1.369 | 0.020 | 0.891 | 0.014 | 7.773 |
| 16    | r                | 2.851                      | 0.107 | 1.528 | 1.005 | 1.332 | 0.017 | 0.873 | 0.005 | 7.723 |
| 17    | c                | 2.878                      | 0.102 | 1.478 | 1.048 | 1.308 | 0.038 | 0.886 | 0.000 | 7.743 |
| 17    | r                | 2.912                      | 0.101 | 1.461 | 1.034 | 1.292 | 0.032 | 0.866 | 0.002 | 7.705 |
| 18    | c                | 2.846                      | 0.092 | 1.518 | 1.070 | 1.301 | 0.044 | 0.870 | 0.010 | 7.759 |
| 18    | r                | 2.898                      | 0.102 | 1.509 | 1.043 | 1.255 | 0.044 | 0.802 | 0.000 | 7.668 |
| 19    | c                | 2.861                      | 0.110 | 1.497 | 1.060 | 1.287 | 0.025 | 0.881 | 0.007 | 7.734 |
| 19    | r                | 2.846                      | 0.104 | 1.491 | 1.065 | 1.307 | 0.024 | 0.939 | 0.002 | 7.785 |
| 20    | c                | 2.860                      | 0.084 | 1.521 | 1.075 | 1.289 | 0.039 | 0.884 | 0.001 | 7.757 |
| 20    | r                | 2.872                      | 0.088 | 1.469 | 1.072 | 1.350 | 0.022 | 0.867 | 0.005 | 7.750 |
| 21    | c                | 2.861                      | 0.099 | 1.523 | 1.057 | 1.281 | 0.040 | 0.852 | 0.002 | 7.723 |
| 21    | r                | 2.863                      | 0.101 | 1.526 | 1.052 | 1.250 | 0.031 | 0.892 | 0.003 | 7.733 |
| 22    | c                | 2.876                      | 0.107 | 1.460 | 1.049 | 1.340 | 0.039 | 0.858 | 0.000 | 7.735 |
| 22    | r                | 2.898                      | 0.093 | 1.496 | 1.022 | 1.297 | 0.028 | 0.869 | 0.000 | 7.709 |
| 23    | c                | 2.886                      | 0.111 | 1.452 | 1.049 | 1.318 | 0.035 | 0.872 | 0.005 | 7.731 |
| 23    | r                | 2.846                      | 0.106 | 1.452 | 1.059 | 1.390 | 0.031 | 0.886 | 0.006 | 7.780 |
| 24    | c                | 2.869                      | 0.112 | 1.481 | 1.064 | 1.309 | 0.023 | 0.836 | 0.007 | 7.708 |
| 24    | r                | 2.863                      | 0.101 | 1.556 | 1.020 | 1.343 | 0.027 | 0.683 | 0.008 | 7.613 |
| 25    | c                | 2.871                      | 0.100 | 1.478 | 1.049 | 1.302 | 0.040 | 0.894 | 0.013 | 7.757 |
| 25    | r                | 2.853                      | 0.093 | 1.502 | 1.071 | 1.327 | 0.025 | 0.861 | 0.005 | 7.745 |
| 26    | c                | 2.889                      | 0.106 | 1.463 | 1.064 | 1.287 | 0.039 | 0.862 | 0.008 | 7.724 |
| 26    | r                | 2.874                      | 0.115 | 1.462 | 1.076 | 1.309 | 0.032 | 0.849 | 0.000 | 7.720 |
| 27    | c                | 2.868                      | 0.115 | 1.492 | 1.042 | 1.296 | 0.023 | 0.878 | 0.004 | 7.722 |
| 27    | r                | 2.881                      | 0.112 | 1.467 | 1.039 | 1.307 | 0.032 | 0.888 | 0.000 | 7.733 |
| 28    | c                | 2.873                      | 0.093 | 1.498 | 1.061 | 1.293 | 0.039 | 0.873 | 0.007 | 7.741 |
| 28    | r                | 2.899                      | 0.096 | 1.431 | 1.058 | 1.325 | 0.032 | 0.894 | 0.003 | 7.750 |
| 29    | c                | 2.886                      | 0.118 | 1.439 | 1.043 | 1.323 | 0.041 | 0.867 | 0.002 | 7.730 |
| 29    | r                | 2.892                      | 0.118 | 1.444 | 1.041 | 1.309 | 0.038 | 0.841 | 0.006 | 7.707 |
| 30    | c                | 2.842                      | 0.111 | 1.487 | 1.110 | 1.286 | 0.036 | 0.883 | 0.004 | 7.763 |
| 30    | r                | 2.877                      | 0.111 | 1.486 | 1.080 | 1.280 | 0.037 | 0.799 | 0.009 | 7.687 |

<sup>1</sup> Core (c) or rim (r) of grains.

**Appendix D:** Biotite major element data (sample 12001).

| Grain | c/r <sup>1</sup> | Oxide content (wt%) |                  | Al <sub>2</sub> O <sub>3</sub> | FeO   | MgO   | Na <sub>2</sub> O | K <sub>2</sub> O | BaO  | Total |
|-------|------------------|---------------------|------------------|--------------------------------|-------|-------|-------------------|------------------|------|-------|
|       |                  | SiO <sub>2</sub>    | TiO <sub>2</sub> |                                |       |       |                   |                  |      |       |
| 1     | c                | 38.92               | 1.37             | 18.12                          | 15.28 | 13.04 | 0.29              | 9.53             | 0.35 | 96.91 |
| 1     | r                | 38.41               | 1.34             | 18.12                          | 15.71 | 13.00 | 0.31              | 9.51             | 0.27 | 96.67 |
| 2     | c                | 38.40               | 1.85             | 18.21                          | 15.39 | 12.46 | 0.39              | 9.35             | 0.66 | 96.71 |
| 2     | r                | 37.88               | 1.95             | 18.04                          | 15.33 | 12.95 | 0.29              | 9.28             | 0.42 | 96.13 |
| 3     | c                | 38.22               | 1.83             | 17.55                          | 15.48 | 13.28 | 0.30              | 9.07             | 0.23 | 95.95 |
| 3     | r                | 39.01               | 1.70             | 17.60                          | 14.90 | 12.82 | 0.31              | 9.56             | 0.20 | 96.10 |
| 4     | c                | 38.04               | 1.70             | 17.78                          | 15.21 | 13.19 | 0.34              | 8.89             | 0.29 | 95.44 |
| 4     | r                | 38.51               | 1.55             | 17.83                          | 14.48 | 13.13 | 0.27              | 9.03             | 0.40 | 95.20 |
| 5     | c                | 38.76               | 1.32             | 18.13                          | 14.82 | 13.23 | 0.30              | 9.41             | 0.34 | 96.32 |
| 5     | r                | 38.37               | 1.39             | 17.90                          | 15.05 | 12.90 | 0.25              | 8.92             | <DL  | 94.78 |
| 6     | c                | 39.25               | 1.39             | 17.81                          | 13.48 | 14.59 | 0.34              | 9.45             | 0.18 | 96.49 |
| 6     | r                | 38.77               | 1.48             | 17.68                          | 12.96 | 14.75 | 0.34              | 9.11             | <DL  | 95.08 |
| 7     | c                | 38.74               | 1.99             | 17.82                          | 15.06 | 12.72 | 0.40              | 9.27             | <DL  | 96.00 |
| 7     | r                | 38.86               | 2.16             | 17.60                          | 15.18 | 12.33 | 0.35              | 9.39             | <DL  | 95.87 |
| 8     | c                | 39.10               | 1.68             | 17.48                          | 15.18 | 13.35 | 0.37              | 9.19             | 0.25 | 96.59 |
| 8     | r                | 38.16               | 1.68             | 17.65                          | 14.72 | 13.36 | 0.29              | 9.40             | 0.44 | 95.70 |
| 9     | c                | 38.58               | 1.57             | 17.79                          | 15.37 | 12.60 | 0.28              | 9.25             | <DL  | 95.44 |
| 9     | r                | 38.74               | 1.47             | 17.61                          | 15.58 | 12.93 | 0.24              | 9.41             | 0.29 | 96.27 |
| 10    | c                | 38.30               | 1.61             | 18.10                          | 14.82 | 13.62 | 0.46              | 9.23             | 0.62 | 96.76 |
| 10    | r                | 38.30               | 1.29             | 17.33                          | 14.21 | 13.88 | 0.29              | 9.30             | 0.17 | 94.77 |
| 11    | c                | 38.30               | 1.57             | 17.86                          | 14.46 | 13.40 | 0.37              | 8.78             | 0.16 | 94.90 |
| 11    | r                | 38.39               | 1.69             | 17.43                          | 14.67 | 13.22 | 0.26              | 8.06             | 0.17 | 93.89 |
| 12    | c                | 39.01               | 1.63             | 18.17                          | 15.27 | 13.53 | 0.37              | 9.52             | 0.28 | 97.79 |
| 12    | r                | 38.13               | 1.61             | 17.55                          | 15.66 | 13.13 | 0.33              | 9.39             | <DL  | 95.80 |
| 13    | c                | 38.33               | 1.51             | 18.18                          | 15.48 | 12.87 | 0.25              | 9.44             | <DL  | 96.05 |
| 13    | r                | 38.63               | 1.67             | 18.22                          | 15.57 | 13.10 | 0.30              | 9.44             | 0.25 | 97.18 |
| 14    | c                | 34.89               | 0.83             | 19.30                          | 14.45 | 16.66 | 0.21              | 4.91             | <DL  | 91.25 |
| 14    | r                | 37.65               | 1.74             | 17.45                          | 14.03 | 14.66 | 0.26              | 9.08             | 0.21 | 95.08 |
| 15    | c                | 39.39               | 1.48             | 17.79                          | 14.31 | 12.93 | 0.31              | 9.02             | 0.19 | 95.43 |
| 15    | r                | 38.10               | 1.45             | 17.59                          | 14.99 | 13.31 | 0.18              | 8.67             | 0.52 | 94.81 |
| 16    | c                | 38.83               | 1.65             | 17.92                          | 15.58 | 13.05 | 0.32              | 9.34             | 0.18 | 96.86 |
| 16    | r                | 39.09               | 1.73             | 17.82                          | 15.30 | 12.85 | 0.29              | 9.33             | <DL  | 96.41 |
| 17    | c                | 38.23               | 1.63             | 17.53                          | 15.59 | 12.83 | 0.29              | 9.10             | 0.26 | 95.46 |
| 17    | r                | 38.90               | 1.60             | 18.06                          | 15.48 | 12.82 | 0.16              | 9.52             | 0.32 | 96.85 |
| 18    | c                | 38.41               | 1.93             | 17.61                          | 14.54 | 13.43 | 0.35              | 8.93             | 0.50 | 95.70 |
| 18    | r                | 37.85               | 1.84             | 17.36                          | 13.96 | 13.00 | 0.28              | 9.05             | 0.23 | 93.57 |
| 19    | c                | 38.62               | 1.67             | 17.56                          | 15.23 | 13.04 | 0.26              | 9.30             | <DL  | 95.68 |
| 19    | r                | 38.77               | 1.37             | 17.47                          | 14.96 | 13.22 | 0.32              | 9.48             | 0.38 | 95.96 |
| 20    | c                | 38.24               | 1.50             | 18.18                          | 15.28 | 12.95 | 0.38              | 9.32             | 0.58 | 96.44 |
| 20    | r                | 38.24               | 1.62             | 17.76                          | 15.54 | 13.07 | 0.28              | 9.35             | 0.22 | 96.08 |
| 21    | c                | 38.35               | 1.72             | 18.09                          | 15.73 | 13.00 | 0.29              | 9.59             | 0.39 | 97.17 |
| 21    | r                | 38.55               | 1.58             | 17.77                          | 15.57 | 12.83 | 0.26              | 9.28             | <DL  | 95.83 |
| 22    | c                | 38.85               | 1.46             | 18.12                          | 14.92 | 13.02 | 0.30              | 9.36             | 0.26 | 96.28 |
| 22    | r                | 38.23               | 1.56             | 17.39                          | 15.15 | 13.72 | 0.28              | 9.25             | 0.15 | 95.72 |
| 23    | c                | 38.68               | 1.37             | 17.73                          | 15.08 | 12.90 | 0.29              | 9.32             | <DL  | 95.37 |
| 23    | r                | 38.71               | 1.18             | 17.76                          | 15.82 | 13.07 | 0.24              | 9.72             | 0.27 | 96.76 |
| 24    | c                | 38.40               | 1.74             | 17.42                          | 15.46 | 13.25 | 0.28              | 9.41             | 0.25 | 96.21 |
| 24    | r                | 38.42               | 1.74             | 17.49                          | 15.11 | 12.86 | 0.32              | 9.32             | <DL  | 95.26 |
| 25    | c                | 39.24               | 1.57             | 18.29                          | 14.25 | 13.30 | 0.33              | 9.24             | 0.34 | 96.56 |
| 25    | r                | 38.81               | 1.60             | 17.67                          | 13.95 | 13.47 | 0.36              | 9.52             | <DL  | 95.38 |
| 26    | c                | 38.76               | 2.02             | 17.73                          | 15.34 | 13.26 | 0.33              | 9.32             | 0.25 | 97.00 |
| 26    | r                | 38.87               | 1.97             | 17.61                          | 15.47 | 13.63 | 0.35              | 9.20             | 0.35 | 97.45 |
| 27    | c                | 38.84               | 1.18             | 17.39                          | 15.82 | 13.04 | 0.28              | 9.79             | <DL  | 96.34 |
| 27    | r                | 38.76               | 1.46             | 17.79                          | 15.45 | 13.18 | 0.31              | 9.59             | 0.29 | 96.83 |
| 28    | c                | 38.50               | 1.24             | 17.78                          | 15.83 | 13.10 | 0.28              | 9.25             | 0.27 | 96.26 |
| 28    | r                | 38.17               | 1.52             | 17.51                          | 15.66 | 13.65 | 0.25              | 8.82             | 0.15 | 95.73 |
| 29    | c                | 38.82               | 1.87             | 17.60                          | 15.40 | 13.04 | 0.30              | 9.62             | 0.35 | 97.00 |
| 29    | r                | 37.92               | 1.78             | 16.88                          | 15.40 | 13.44 | 0.35              | 9.37             | 0.23 | 95.36 |
| 30    | c                | 38.62               | 1.80             | 17.42                          | 15.50 | 12.60 | 0.34              | 9.11             | <DL  | 95.39 |
| 30    | r                | 38.02               | 1.67             | 17.82                          | 15.17 | 13.00 | 0.32              | 8.92             | <DL  | 94.92 |

Abbreviations: <DL = below detection limits, n.a. = not analyzed. CaO and MnO were ≤ DL.

<sup>1</sup> Core (c) or rim (r) of grains.

**Appendix D:** Biotite major element data (sample 12001).

| Grain | c/r <sup>1</sup> | Cation content (pfu; O=11) |       |       |       |       |       |       |       | Total |
|-------|------------------|----------------------------|-------|-------|-------|-------|-------|-------|-------|-------|
|       |                  | Si                         | Ti    | Al    | Fe    | Mg    | Na    | K     | Ba    |       |
| 1     | c                | 2.839                      | 0.075 | 1.558 | 0.932 | 1.418 | 0.042 | 0.887 | 0.010 | 7.770 |
| 1     | r                | 2.818                      | 0.074 | 1.567 | 0.964 | 1.422 | 0.045 | 0.890 | 0.008 | 7.790 |
| 2     | c                | 2.819                      | 0.102 | 1.575 | 0.945 | 1.363 | 0.056 | 0.876 | 0.019 | 7.757 |
| 2     | r                | 2.792                      | 0.108 | 1.567 | 0.945 | 1.423 | 0.041 | 0.873 | 0.012 | 7.771 |
| 3     | c                | 2.817                      | 0.101 | 1.524 | 0.954 | 1.459 | 0.042 | 0.853 | 0.007 | 7.767 |
| 3     | r                | 2.864                      | 0.094 | 1.523 | 0.915 | 1.403 | 0.044 | 0.895 | 0.006 | 7.750 |
| 4     | c                | 2.815                      | 0.095 | 1.551 | 0.941 | 1.455 | 0.049 | 0.839 | 0.008 | 7.759 |
| 4     | r                | 2.844                      | 0.086 | 1.552 | 0.894 | 1.445 | 0.039 | 0.851 | 0.011 | 7.737 |
| 5     | c                | 2.837                      | 0.073 | 1.564 | 0.907 | 1.443 | 0.042 | 0.879 | 0.010 | 7.766 |
| 5     | r                | 2.845                      | 0.078 | 1.564 | 0.933 | 1.426 | 0.036 | 0.844 | 0.000 | 7.734 |
| 6     | c                | 2.847                      | 0.076 | 1.523 | 0.818 | 1.578 | 0.047 | 0.874 | 0.005 | 7.776 |
| 6     | r                | 2.841                      | 0.081 | 1.527 | 0.794 | 1.611 | 0.048 | 0.852 | 0.000 | 7.764 |
| 7     | c                | 2.842                      | 0.110 | 1.541 | 0.924 | 1.391 | 0.057 | 0.868 | 0.003 | 7.739 |
| 7     | r                | 2.856                      | 0.119 | 1.524 | 0.933 | 1.351 | 0.050 | 0.880 | 0.000 | 7.726 |
| 8     | c                | 2.855                      | 0.092 | 1.504 | 0.927 | 1.453 | 0.052 | 0.856 | 0.007 | 7.754 |
| 8     | r                | 2.820                      | 0.093 | 1.537 | 0.910 | 1.472 | 0.042 | 0.886 | 0.013 | 7.782 |
| 9     | c                | 2.851                      | 0.087 | 1.549 | 0.950 | 1.388 | 0.040 | 0.872 | 0.000 | 7.742 |
| 9     | r                | 2.849                      | 0.081 | 1.526 | 0.958 | 1.418 | 0.035 | 0.883 | 0.008 | 7.765 |
| 10    | c                | 2.802                      | 0.089 | 1.561 | 0.907 | 1.486 | 0.065 | 0.862 | 0.018 | 7.792 |
| 10    | r                | 2.844                      | 0.072 | 1.517 | 0.882 | 1.536 | 0.041 | 0.881 | 0.005 | 7.786 |
| 11    | c                | 2.833                      | 0.087 | 1.557 | 0.895 | 1.478 | 0.052 | 0.829 | 0.005 | 7.741 |
| 11    | r                | 2.858                      | 0.095 | 1.529 | 0.913 | 1.467 | 0.037 | 0.765 | 0.005 | 7.684 |
| 12    | c                | 2.821                      | 0.089 | 1.548 | 0.923 | 1.458 | 0.052 | 0.878 | 0.008 | 7.781 |
| 12    | r                | 2.818                      | 0.090 | 1.529 | 0.968 | 1.447 | 0.047 | 0.885 | 0.003 | 7.793 |
| 13    | c                | 2.818                      | 0.083 | 1.576 | 0.952 | 1.411 | 0.035 | 0.886 | 0.004 | 7.770 |
| 13    | r                | 2.813                      | 0.091 | 1.564 | 0.948 | 1.422 | 0.042 | 0.877 | 0.007 | 7.771 |
| 14    | c                | 2.637                      | 0.047 | 1.719 | 0.913 | 1.877 | 0.031 | 0.473 | 0.004 | 7.709 |
| 14    | r                | 2.786                      | 0.097 | 1.522 | 0.868 | 1.617 | 0.037 | 0.857 | 0.006 | 7.803 |
| 15    | c                | 2.891                      | 0.082 | 1.539 | 0.878 | 1.415 | 0.045 | 0.844 | 0.005 | 7.701 |
| 15    | r                | 2.833                      | 0.081 | 1.542 | 0.932 | 1.476 | 0.025 | 0.823 | 0.015 | 7.739 |
| 16    | c                | 2.835                      | 0.090 | 1.542 | 0.951 | 1.420 | 0.045 | 0.870 | 0.005 | 7.761 |
| 16    | r                | 2.856                      | 0.095 | 1.534 | 0.935 | 1.399 | 0.041 | 0.869 | 0.001 | 7.737 |
| 17    | c                | 2.835                      | 0.091 | 1.532 | 0.967 | 1.418 | 0.041 | 0.861 | 0.008 | 7.759 |
| 17    | r                | 2.839                      | 0.088 | 1.553 | 0.945 | 1.395 | 0.022 | 0.886 | 0.009 | 7.748 |
| 18    | c                | 2.829                      | 0.107 | 1.529 | 0.896 | 1.475 | 0.050 | 0.839 | 0.014 | 7.744 |
| 18    | r                | 2.842                      | 0.104 | 1.536 | 0.877 | 1.455 | 0.040 | 0.867 | 0.007 | 7.739 |
| 19    | c                | 2.846                      | 0.093 | 1.525 | 0.939 | 1.432 | 0.036 | 0.874 | 0.000 | 7.752 |
| 19    | r                | 2.857                      | 0.076 | 1.517 | 0.922 | 1.452 | 0.045 | 0.891 | 0.011 | 7.776 |
| 20    | c                | 2.813                      | 0.083 | 1.576 | 0.940 | 1.420 | 0.055 | 0.875 | 0.017 | 7.780 |
| 20    | r                | 2.819                      | 0.090 | 1.543 | 0.958 | 1.436 | 0.040 | 0.879 | 0.006 | 7.780 |
| 21    | c                | 2.805                      | 0.095 | 1.559 | 0.962 | 1.417 | 0.041 | 0.895 | 0.011 | 7.788 |
| 21    | r                | 2.840                      | 0.087 | 1.543 | 0.959 | 1.409 | 0.037 | 0.872 | 0.003 | 7.755 |
| 22    | c                | 2.843                      | 0.080 | 1.563 | 0.913 | 1.421 | 0.043 | 0.874 | 0.007 | 7.753 |
| 22    | r                | 2.822                      | 0.087 | 1.513 | 0.935 | 1.510 | 0.040 | 0.871 | 0.004 | 7.789 |
| 23    | c                | 2.856                      | 0.076 | 1.543 | 0.931 | 1.420 | 0.042 | 0.878 | 0.000 | 7.755 |
| 23    | r                | 2.841                      | 0.065 | 1.536 | 0.971 | 1.430 | 0.034 | 0.910 | 0.008 | 7.798 |
| 24    | c                | 2.827                      | 0.096 | 1.511 | 0.952 | 1.454 | 0.040 | 0.884 | 0.007 | 7.781 |
| 24    | r                | 2.843                      | 0.097 | 1.525 | 0.935 | 1.419 | 0.045 | 0.880 | 0.003 | 7.759 |
| 25    | c                | 2.853                      | 0.086 | 1.567 | 0.866 | 1.441 | 0.047 | 0.857 | 0.010 | 7.729 |
| 25    | r                | 2.852                      | 0.088 | 1.530 | 0.857 | 1.476 | 0.051 | 0.893 | 0.001 | 7.764 |
| 26    | c                | 2.824                      | 0.111 | 1.523 | 0.935 | 1.440 | 0.046 | 0.866 | 0.007 | 7.758 |
| 26    | r                | 2.822                      | 0.108 | 1.507 | 0.939 | 1.475 | 0.050 | 0.852 | 0.010 | 7.767 |
| 27    | c                | 2.858                      | 0.065 | 1.508 | 0.974 | 1.431 | 0.040 | 0.919 | 0.004 | 7.802 |
| 27    | r                | 2.835                      | 0.080 | 1.534 | 0.945 | 1.437 | 0.044 | 0.895 | 0.008 | 7.786 |
| 28    | c                | 2.833                      | 0.069 | 1.542 | 0.974 | 1.437 | 0.040 | 0.868 | 0.008 | 7.779 |
| 28    | r                | 2.817                      | 0.084 | 1.523 | 0.966 | 1.502 | 0.036 | 0.830 | 0.004 | 7.769 |
| 29    | c                | 2.836                      | 0.103 | 1.515 | 0.941 | 1.420 | 0.043 | 0.896 | 0.010 | 7.772 |
| 29    | r                | 2.823                      | 0.100 | 1.481 | 0.959 | 1.492 | 0.050 | 0.890 | 0.007 | 7.806 |
| 30    | c                | 2.857                      | 0.100 | 1.519 | 0.959 | 1.390 | 0.049 | 0.860 | 0.000 | 7.737 |
| 30    | r                | 2.821                      | 0.093 | 1.558 | 0.941 | 1.438 | 0.046 | 0.844 | 0.000 | 7.749 |

<sup>1</sup> Core (c) or rim (r) of grains.

**Appendix D:** Biotite major element data (sample 12004).

| Grain | c/r <sup>1</sup> | Oxide content (wt%) |                  | Al <sub>2</sub> O <sub>3</sub> | FeO   | MgO   | Na <sub>2</sub> O | K <sub>2</sub> O | BaO  | Total |
|-------|------------------|---------------------|------------------|--------------------------------|-------|-------|-------------------|------------------|------|-------|
|       |                  | SiO <sub>2</sub>    | TiO <sub>2</sub> |                                |       |       |                   |                  |      |       |
| 1     | c                | 38.73               | 1.80             | 18.01                          | 15.33 | 12.59 | 0.19              | 9.37             | 0.35 | 96.37 |
| 1     | r                | 34.48               | 1.66             | 15.84                          | 13.08 | 10.43 | 0.04              | 8.20             | 0.41 | 84.13 |
| 2     | c                | 38.62               | 1.76             | 17.52                          | 15.74 | 13.16 | 0.09              | 9.46             | 0.39 | 96.74 |
| 2     | r                | 38.65               | 1.67             | 17.68                          | 16.11 | 12.62 | 0.12              | 9.46             | 0.72 | 97.03 |
| 3     | c                | 39.06               | 1.61             | 17.34                          | 15.79 | 12.81 | 0.20              | 9.53             | 0.29 | 96.63 |
| 3     | r                | 37.89               | 1.69             | 16.75                          | 15.80 | 12.75 | 0.13              | 9.53             | 0.82 | 95.36 |
| 4     | c                | 38.74               | 1.65             | 17.37                          | 14.79 | 13.10 | 0.21              | 9.56             | 0.37 | 95.78 |
| 4     | r                | 38.50               | 1.81             | 17.44                          | 14.96 | 13.15 | 0.20              | 9.63             | 0.27 | 95.96 |
| 5     | c                | 38.45               | 1.73             | 17.28                          | 15.72 | 12.72 | 0.30              | 9.55             | 0.32 | 96.07 |
| 5     | r                | 38.54               | 1.63             | 17.18                          | 15.89 | 12.82 | 0.11              | 9.52             | 0.30 | 95.98 |
| 6     | c                | 38.45               | 1.53             | 17.16                          | 14.78 | 13.18 | 0.28              | 9.42             | 0.53 | 95.32 |
| 6     | r                | 38.57               | 1.71             | 17.17                          | 15.06 | 12.78 | 0.11              | 9.47             | 0.19 | 95.06 |
| 7     | c                | 38.64               | 1.65             | 17.13                          | 14.93 | 13.12 | 0.20              | 9.59             | 0.41 | 95.67 |
| 7     | r                | 36.79               | 1.56             | 16.43                          | 14.63 | 12.88 | 0.14              | 9.14             | 0.52 | 92.09 |
| 8     | c                | 38.32               | 1.62             | 17.44                          | 15.86 | 12.88 | 0.12              | 9.18             | 0.63 | 96.06 |
| 8     | r                | 38.04               | 1.44             | 16.73                          | 16.05 | 13.24 | 0.14              | 9.34             | 0.40 | 95.38 |
| 9     | c                | 38.54               | 1.52             | 17.99                          | 16.03 | 12.84 | 0.23              | 9.28             | 0.27 | 96.69 |
| 9     | r                | 39.00               | 1.51             | 17.41                          | 15.14 | 12.86 | 0.26              | 9.69             | 0.38 | 96.25 |
| 10    | c                | 38.41               | 1.45             | 17.36                          | 15.43 | 13.68 | 0.16              | 9.68             | 0.25 | 96.42 |
| 10    | r                | 36.73               | 1.48             | 16.45                          | 14.93 | 12.93 | 0.17              | 8.89             | 0.67 | 92.25 |
| 11    | c                | 38.31               | 1.57             | 17.62                          | 15.72 | 12.51 | 0.16              | 9.34             | 0.19 | 95.42 |
| 11    | r                | 38.50               | 1.66             | 17.28                          | 15.26 | 13.17 | 0.18              | 9.25             | 0.38 | 95.68 |
| 12    | c                | 38.95               | 1.62             | 17.46                          | 15.15 | 13.46 | 0.12              | 9.68             | 0.67 | 97.11 |
| 12    | r                | 38.61               | 1.77             | 17.13                          | 15.22 | 13.32 | 0.06              | 9.25             | 0.45 | 95.82 |
| 13    | c                | 37.85               | 1.57             | 17.30                          | 15.41 | 12.70 | 0.19              | 9.52             | 0.45 | 94.98 |
| 13    | r                | 38.57               | 1.79             | 17.43                          | 15.55 | 12.92 | 0.17              | 9.79             | <DL  | 96.22 |
| 14    | c                | 38.16               | 1.77             | 17.34                          | 16.25 | 12.65 | 0.22              | 9.39             | 0.38 | 96.17 |
| 14    | r                | 35.00               | 1.62             | 15.57                          | 14.47 | 11.90 | 0.14              | 8.73             | 0.19 | 87.62 |
| 15    | c                | 38.36               | 1.54             | 17.19                          | 15.20 | 12.66 | 0.23              | 9.64             | 0.37 | 95.19 |
| 15    | r                | 38.55               | 1.48             | 16.76                          | 15.80 | 13.16 | 0.14              | 9.62             | 0.30 | 95.81 |
| 16    | c                | 38.22               | 1.35             | 17.38                          | 15.01 | 13.27 | 0.10              | 9.56             | 0.25 | 95.14 |
| 16    | r                | 38.17               | 1.53             | 16.99                          | 14.61 | 13.41 | 0.15              | 9.62             | 0.45 | 94.94 |
| 17    | c                | 38.93               | 1.63             | 18.09                          | 15.88 | 12.76 | 0.24              | 9.46             | 0.26 | 97.25 |
| 17    | r                | 37.30               | 1.77             | 16.31                          | 14.96 | 13.50 | 0.10              | 9.34             | 0.70 | 93.98 |
| 18    | c                | 38.35               | 1.84             | 17.50                          | 15.44 | 12.48 | 0.13              | 9.70             | 0.57 | 96.00 |
| 18    | r                | 37.56               | 1.89             | 17.31                          | 14.98 | 12.17 | 0.13              | 9.38             | 0.28 | 93.70 |
| 19    | c                | 38.28               | 1.61             | 17.63                          | 15.25 | 13.36 | 0.24              | 9.59             | 0.48 | 96.43 |
| 19    | r                | 39.30               | 1.78             | 17.30                          | 15.31 | 13.09 | 0.21              | 9.26             | 0.34 | 96.58 |
| 20    | c                | 38.88               | 1.58             | 17.78                          | 14.84 | 13.86 | 0.26              | 9.45             | 0.45 | 97.10 |
| 20    | r                | 38.69               | 1.57             | 17.08                          | 14.47 | 13.34 | 0.20              | 9.53             | 0.35 | 95.22 |
| 21    | c                | 38.49               | 1.64             | 17.46                          | 15.21 | 12.86 | 0.23              | 9.53             | 0.57 | 95.99 |
| 21    | r                | 38.05               | 1.46             | 17.19                          | 16.06 | 12.39 | 0.10              | 9.42             | 0.35 | 95.01 |
| 22    | c                | 38.73               | 1.49             | 17.43                          | 15.13 | 13.28 | 0.18              | 9.62             | 0.47 | 96.34 |
| 22    | r                | 38.56               | 1.40             | 17.28                          | 15.09 | 13.30 | 0.14              | 9.45             | 0.23 | 95.44 |
| 23    | c                | 38.61               | 1.70             | 17.42                          | 16.00 | 13.09 | 0.23              | 9.34             | 0.38 | 96.77 |
| 23    | r                | 38.83               | 1.58             | 17.61                          | 15.88 | 12.67 | 0.23              | 9.64             | 0.50 | 96.93 |
| 24    | c                | 38.87               | 1.51             | 17.50                          | 14.84 | 13.09 | 0.19              | 9.17             | 0.33 | 95.50 |
| 24    | r                | 38.94               | 1.53             | 17.51                          | 15.38 | 13.00 | 0.22              | 9.58             | 0.24 | 96.40 |
| 25    | c                | 38.61               | 1.65             | 17.62                          | 15.79 | 12.80 | 0.23              | 9.38             | 0.26 | 96.35 |
| 25    | r                | 38.21               | 1.76             | 17.46                          | 15.34 | 13.02 | 0.19              | 9.63             | <DL  | 95.61 |
| 26    | c                | 38.44               | 1.60             | 17.51                          | 14.95 | 13.04 | 0.19              | 9.52             | 0.32 | 95.58 |
| 26    | r                | 37.97               | 1.66             | 16.88                          | 15.79 | 12.61 | 0.16              | 9.54             | <DL  | 94.61 |
| 27    | c                | 39.16               | 1.48             | 17.34                          | 14.76 | 13.33 | 0.25              | 9.29             | 0.21 | 95.82 |
| 27    | r                | 38.61               | 1.72             | 17.43                          | 15.21 | 13.48 | 0.19              | 9.61             | 0.49 | 96.74 |
| 28    | c                | 38.46               | 1.60             | 17.78                          | 16.46 | 12.45 | 0.20              | 9.53             | 0.24 | 96.73 |
| 28    | r                | 38.29               | 1.65             | 17.13                          | 16.18 | 12.53 | 0.17              | 9.52             | <DL  | 95.47 |
| 29    | c                | 38.84               | 1.53             | 17.67                          | 14.96 | 12.58 | 0.20              | 9.68             | 0.20 | 95.66 |
| 29    | r                | 38.71               | 1.76             | 17.82                          | 14.72 | 13.02 | 0.16              | 9.38             | 0.53 | 96.10 |
| 30    | c                | 38.63               | 1.87             | 17.61                          | 15.46 | 12.59 | 0.20              | 9.48             | 0.51 | 96.36 |
| 30    | r                | 38.50               | 1.74             | 17.24                          | 15.57 | 12.45 | 0.17              | 9.53             | 0.77 | 95.98 |

Abbreviations: <DL = below detection limits, n.a. = not analyzed. CaO and MnO were ≤ DL.

Data represents the brown biotite fraction of sample 12004

<sup>1</sup> Core (c) or rim (r) of grains.

**Appendix D:** Biotite major element data (sample 12004).

| Grain | c/r <sup>1</sup> | Cation content (pfu; O=11) |       |       |       |       |       |       |       |       |
|-------|------------------|----------------------------|-------|-------|-------|-------|-------|-------|-------|-------|
|       |                  | Si                         | Ti    | Al    | Fe    | Mg    | Na    | K     | Ba    | Total |
| 1     | c                | 2.841                      | 0.099 | 1.557 | 0.940 | 1.377 | 0.027 | 0.877 | 0.010 | 7.732 |
| 1     | r                | 2.885                      | 0.104 | 1.562 | 0.915 | 1.301 | 0.006 | 0.875 | 0.013 | 7.668 |
| 2     | c                | 2.832                      | 0.097 | 1.514 | 0.965 | 1.439 | 0.013 | 0.885 | 0.011 | 7.760 |
| 2     | r                | 2.837                      | 0.092 | 1.530 | 0.989 | 1.381 | 0.017 | 0.886 | 0.021 | 7.757 |
| 3     | c                | 2.863                      | 0.089 | 1.498 | 0.968 | 1.400 | 0.029 | 0.891 | 0.008 | 7.756 |
| 3     | r                | 2.836                      | 0.095 | 1.478 | 0.989 | 1.423 | 0.019 | 0.910 | 0.024 | 7.790 |
| 4     | c                | 2.858                      | 0.091 | 1.510 | 0.912 | 1.440 | 0.029 | 0.900 | 0.011 | 7.759 |
| 4     | r                | 2.840                      | 0.100 | 1.516 | 0.923 | 1.446 | 0.028 | 0.906 | 0.008 | 7.769 |
| 5     | c                | 2.844                      | 0.096 | 1.506 | 0.972 | 1.402 | 0.043 | 0.901 | 0.009 | 7.778 |
| 5     | r                | 2.852                      | 0.090 | 1.498 | 0.983 | 1.414 | 0.016 | 0.899 | 0.009 | 7.765 |
| 6     | c                | 2.853                      | 0.085 | 1.501 | 0.917 | 1.458 | 0.040 | 0.892 | 0.015 | 7.773 |
| 6     | r                | 2.865                      | 0.096 | 1.503 | 0.935 | 1.415 | 0.016 | 0.897 | 0.006 | 7.742 |
| 7     | c                | 2.857                      | 0.092 | 1.493 | 0.923 | 1.446 | 0.028 | 0.905 | 0.012 | 7.767 |
| 7     | r                | 2.833                      | 0.090 | 1.491 | 0.942 | 1.478 | 0.021 | 0.898 | 0.016 | 7.788 |
| 8     | c                | 2.833                      | 0.090 | 1.520 | 0.981 | 1.420 | 0.018 | 0.866 | 0.018 | 7.756 |
| 8     | r                | 2.839                      | 0.081 | 1.472 | 1.002 | 1.473 | 0.020 | 0.889 | 0.012 | 7.797 |
| 9     | c                | 2.825                      | 0.084 | 1.554 | 0.983 | 1.403 | 0.032 | 0.868 | 0.008 | 7.762 |
| 9     | r                | 2.869                      | 0.084 | 1.510 | 0.931 | 1.410 | 0.037 | 0.909 | 0.011 | 7.765 |
| 10    | c                | 2.826                      | 0.080 | 1.505 | 0.949 | 1.500 | 0.022 | 0.908 | 0.007 | 7.805 |
| 10    | r                | 2.830                      | 0.085 | 1.494 | 0.962 | 1.485 | 0.026 | 0.874 | 0.020 | 7.785 |
| 11    | c                | 2.841                      | 0.088 | 1.540 | 0.975 | 1.383 | 0.023 | 0.884 | 0.006 | 7.752 |
| 11    | r                | 2.845                      | 0.092 | 1.505 | 0.943 | 1.451 | 0.026 | 0.872 | 0.011 | 7.755 |
| 12    | c                | 2.846                      | 0.089 | 1.504 | 0.926 | 1.466 | 0.017 | 0.902 | 0.019 | 7.772 |
| 12    | r                | 2.851                      | 0.098 | 1.491 | 0.940 | 1.466 | 0.009 | 0.871 | 0.013 | 7.745 |
| 13    | c                | 2.832                      | 0.088 | 1.525 | 0.964 | 1.416 | 0.027 | 0.909 | 0.013 | 7.783 |
| 13    | r                | 2.837                      | 0.099 | 1.511 | 0.957 | 1.417 | 0.024 | 0.919 | 0.000 | 7.778 |
| 14    | c                | 2.826                      | 0.099 | 1.513 | 1.006 | 1.397 | 0.032 | 0.887 | 0.011 | 7.778 |
| 14    | r                | 2.838                      | 0.099 | 1.488 | 0.981 | 1.438 | 0.022 | 0.903 | 0.006 | 7.781 |
| 15    | c                | 2.856                      | 0.086 | 1.508 | 0.946 | 1.405 | 0.033 | 0.915 | 0.011 | 7.773 |
| 15    | r                | 2.857                      | 0.083 | 1.464 | 0.979 | 1.454 | 0.020 | 0.910 | 0.009 | 7.790 |
| 16    | c                | 2.842                      | 0.076 | 1.523 | 0.933 | 1.471 | 0.015 | 0.907 | 0.007 | 7.781 |
| 16    | r                | 2.848                      | 0.086 | 1.494 | 0.911 | 1.491 | 0.022 | 0.916 | 0.013 | 7.788 |
| 17    | c                | 2.835                      | 0.090 | 1.553 | 0.967 | 1.385 | 0.034 | 0.879 | 0.007 | 7.755 |
| 17    | r                | 2.824                      | 0.101 | 1.455 | 0.947 | 1.524 | 0.014 | 0.902 | 0.021 | 7.801 |
| 18    | c                | 2.838                      | 0.102 | 1.527 | 0.956 | 1.377 | 0.018 | 0.916 | 0.016 | 7.760 |
| 18    | r                | 2.835                      | 0.107 | 1.540 | 0.946 | 1.369 | 0.019 | 0.903 | 0.008 | 7.745 |
| 19    | c                | 2.819                      | 0.089 | 1.530 | 0.939 | 1.467 | 0.034 | 0.901 | 0.014 | 7.794 |
| 19    | r                | 2.871                      | 0.098 | 1.490 | 0.935 | 1.426 | 0.029 | 0.863 | 0.010 | 7.731 |
| 20    | c                | 2.829                      | 0.087 | 1.524 | 0.903 | 1.503 | 0.036 | 0.877 | 0.013 | 7.777 |
| 20    | r                | 2.868                      | 0.087 | 1.492 | 0.897 | 1.474 | 0.028 | 0.901 | 0.010 | 7.763 |
| 21    | c                | 2.844                      | 0.091 | 1.520 | 0.940 | 1.417 | 0.033 | 0.898 | 0.017 | 7.768 |
| 21    | r                | 2.847                      | 0.082 | 1.516 | 1.005 | 1.382 | 0.015 | 0.899 | 0.010 | 7.767 |
| 22    | c                | 2.848                      | 0.083 | 1.511 | 0.931 | 1.456 | 0.026 | 0.903 | 0.014 | 7.776 |
| 22    | r                | 2.856                      | 0.078 | 1.508 | 0.935 | 1.469 | 0.019 | 0.893 | 0.007 | 7.767 |
| 23    | c                | 2.834                      | 0.094 | 1.507 | 0.982 | 1.432 | 0.033 | 0.874 | 0.011 | 7.771 |
| 23    | r                | 2.847                      | 0.087 | 1.522 | 0.974 | 1.385 | 0.032 | 0.902 | 0.014 | 7.771 |
| 24    | c                | 2.868                      | 0.084 | 1.522 | 0.916 | 1.440 | 0.027 | 0.863 | 0.010 | 7.733 |
| 24    | r                | 2.857                      | 0.085 | 1.514 | 0.944 | 1.422 | 0.031 | 0.897 | 0.007 | 7.764 |
| 25    | c                | 2.837                      | 0.091 | 1.526 | 0.970 | 1.402 | 0.033 | 0.879 | 0.007 | 7.761 |
| 25    | r                | 2.826                      | 0.098 | 1.522 | 0.949 | 1.436 | 0.028 | 0.909 | 0.004 | 7.780 |
| 26    | c                | 2.844                      | 0.089 | 1.527 | 0.925 | 1.438 | 0.028 | 0.898 | 0.009 | 7.766 |
| 26    | r                | 2.845                      | 0.093 | 1.491 | 0.989 | 1.408 | 0.024 | 0.912 | 0.003 | 7.780 |
| 27    | c                | 2.875                      | 0.082 | 1.501 | 0.906 | 1.459 | 0.035 | 0.870 | 0.006 | 7.744 |
| 27    | r                | 2.827                      | 0.095 | 1.504 | 0.931 | 1.472 | 0.027 | 0.898 | 0.014 | 7.784 |
| 28    | c                | 2.827                      | 0.089 | 1.540 | 1.012 | 1.364 | 0.029 | 0.894 | 0.007 | 7.772 |
| 28    | r                | 2.843                      | 0.092 | 1.499 | 1.005 | 1.387 | 0.025 | 0.902 | 0.004 | 7.772 |
| 29    | c                | 2.867                      | 0.085 | 1.537 | 0.923 | 1.384 | 0.029 | 0.911 | 0.006 | 7.747 |
| 29    | r                | 2.844                      | 0.097 | 1.543 | 0.904 | 1.426 | 0.023 | 0.879 | 0.015 | 7.738 |
| 30    | c                | 2.842                      | 0.103 | 1.527 | 0.951 | 1.381 | 0.029 | 0.890 | 0.015 | 7.747 |
| 30    | r                | 2.854                      | 0.097 | 1.506 | 0.965 | 1.376 | 0.025 | 0.901 | 0.022 | 7.757 |

Data represents the brown biotite fraction of sample 12004

<sup>1</sup> Core (c) or rim (r) of grains.

**Appendix D:** Biotite major element data (sample 12004).

| Grain | c/r <sup>1</sup> | Oxide content (wt%) |                  | Al <sub>2</sub> O <sub>3</sub> | FeO   | MgO   | Na <sub>2</sub> O | K <sub>2</sub> O | BaO  | Total |
|-------|------------------|---------------------|------------------|--------------------------------|-------|-------|-------------------|------------------|------|-------|
|       |                  | SiO <sub>2</sub>    | TiO <sub>2</sub> |                                |       |       |                   |                  |      |       |
| 1     | c                | 38.57               | 1.56             | 17.18                          | 15.00 | 13.50 | 0.23              | 9.59             | 0.27 | 95.90 |
| 1     | r                | 38.61               | 1.62             | 17.02                          | 14.52 | 13.21 | 0.17              | 9.62             | 0.30 | 95.07 |
| 2     | c                | 39.20               | 1.45             | 17.66                          | 15.25 | 13.05 | 0.15              | 9.53             | 0.63 | 96.92 |
| 2     | r                | 39.46               | 1.50             | 17.85                          | 15.12 | 13.11 | 0.19              | 9.69             | 0.48 | 97.40 |
| 3     | c                | 39.27               | 1.40             | 17.55                          | 14.58 | 13.41 | 0.17              | 9.50             | 0.26 | 96.13 |
| 3     | r                | 38.70               | 1.43             | 17.52                          | 14.36 | 13.46 | 0.18              | 9.54             | 0.50 | 95.69 |
| 4     | c                | 38.95               | 1.62             | 17.83                          | 15.31 | 13.32 | 0.25              | 9.66             | 0.42 | 97.35 |
| 4     | r                | 38.62               | 1.65             | 16.91                          | 14.69 | 13.12 | 0.08              | 9.67             | <DL  | 94.74 |
| 5     | c                | 39.02               | 1.46             | 17.47                          | 14.63 | 13.37 | 0.25              | 9.43             | 0.59 | 96.21 |
| 5     | r                | 38.87               | 1.72             | 17.05                          | 14.45 | 13.21 | 0.22              | 9.73             | 0.52 | 95.77 |
| 6     | c                | 38.10               | 1.68             | 16.71                          | 14.80 | 13.29 | 0.17              | 9.77             | <DL  | 94.52 |
| 6     | r                | 38.43               | 1.65             | 16.83                          | 14.64 | 13.21 | 0.20              | 9.60             | 0.28 | 94.84 |
| 7     | c                | 38.74               | 1.54             | 17.05                          | 15.19 | 13.04 | 0.26              | 9.54             | 0.22 | 95.59 |
| 7     | r                | 39.81               | 1.59             | 17.54                          | 15.04 | 12.86 | 0.17              | 9.56             | 0.39 | 96.96 |
| 8     | c                | 38.43               | 1.69             | 17.49                          | 14.11 | 13.97 | 0.16              | 9.22             | <DL  | 95.07 |
| 8     | r                | 38.54               | 1.71             | 17.27                          | 14.03 | 13.47 | 0.23              | 9.93             | 0.16 | 95.33 |
| 9     | c                | 38.96               | 1.46             | 17.00                          | 14.87 | 13.42 | 0.17              | 9.08             | 0.31 | 95.28 |
| 9     | r                | 38.91               | 1.59             | 17.09                          | 14.85 | 13.01 | 0.29              | 9.59             | 0.37 | 95.70 |
| 10    | c                | 39.40               | 1.30             | 17.45                          | 14.72 | 13.02 | 0.22              | 9.50             | 0.20 | 95.81 |
| 10    | r                | 38.69               | 1.31             | 17.45                          | 14.57 | 13.62 | 0.17              | 9.57             | 0.37 | 95.75 |
| 11    | c                | 38.92               | 1.66             | 17.22                          | 15.06 | 13.31 | 0.28              | 9.60             | 0.19 | 96.24 |
| 11    | r                | 38.92               | 1.74             | 17.82                          | 14.77 | 12.61 | 0.21              | 9.67             | 0.30 | 96.04 |
| 12    | c                | 39.08               | 1.59             | 17.61                          | 15.35 | 13.17 | 0.10              | 9.58             | 0.51 | 96.99 |
| 12    | r                | 36.47               | 1.64             | 16.44                          | 14.10 | 12.79 | 0.12              | 8.66             | 0.37 | 90.59 |
| 13    | c                | 39.19               | 1.38             | 17.54                          | 13.90 | 13.85 | 0.22              | 9.53             | 0.22 | 95.84 |
| 13    | r                | 39.33               | 1.52             | 16.84                          | 14.45 | 14.12 | 0.22              | 9.50             | 0.40 | 96.38 |
| 14    | c                | 38.51               | 1.57             | 16.95                          | 15.67 | 13.02 | 0.16              | 9.25             | 0.32 | 95.46 |
| 14    | r                | 37.96               | 1.56             | 16.54                          | 15.58 | 12.70 | 0.16              | 9.70             | 0.76 | 94.96 |
| 15    | c                | 38.66               | 1.56             | 17.21                          | 15.08 | 13.03 | 0.18              | 9.48             | 0.57 | 95.78 |
| 15    | r                | 38.88               | 1.60             | 17.59                          | 15.24 | 13.44 | 0.21              | 9.31             | 0.20 | 96.47 |
| 16    | c                | 38.92               | 1.45             | 17.35                          | 15.01 | 13.17 | 0.21              | 9.30             | 0.26 | 95.67 |
| 16    | r                | 38.23               | 1.57             | 17.04                          | 14.29 | 13.34 | 0.23              | 9.42             | 0.32 | 94.44 |
| 17    | c                | 38.57               | 1.65             | 17.51                          | 14.88 | 13.00 | 0.23              | 9.72             | 0.33 | 95.88 |
| 17    | r                | 38.49               | 1.72             | 17.29                          | 15.21 | 13.47 | 0.18              | 9.62             | 0.23 | 96.21 |
| 18    | c                | 38.64               | 1.61             | 16.98                          | 14.71 | 12.96 | 0.16              | 9.46             | 0.20 | 94.72 |
| 18    | r                | 38.17               | 1.73             | 16.82                          | 15.16 | 13.34 | 0.16              | 9.55             | 0.27 | 95.20 |
| 19    | c                | 39.18               | 1.48             | 17.61                          | 15.06 | 13.09 | 0.27              | 9.54             | 0.27 | 96.50 |
| 19    | r                | 38.96               | 1.56             | 17.25                          | 14.90 | 13.44 | 0.23              | 9.58             | 0.50 | 96.42 |
| 20    | c                | 39.38               | 1.70             | 17.37                          | 14.60 | 13.43 | 0.12              | 9.36             | 0.28 | 96.24 |
| 20    | r                | 38.67               | 1.55             | 17.29                          | 14.48 | 12.79 | 0.23              | 9.27             | 0.21 | 94.48 |
| 21    | c                | 39.14               | 1.46             | 17.23                          | 15.29 | 12.98 | 0.21              | 9.58             | <DL  | 95.89 |
| 21    | r                | 39.47               | 1.56             | 17.37                          | 15.01 | 12.79 | 0.15              | 9.35             | 0.19 | 95.90 |
| 22    | c                | 39.27               | 1.40             | 17.63                          | 15.51 | 13.18 | 0.28              | 9.61             | 0.48 | 97.36 |
| 22    | r                | 39.34               | 1.60             | 17.71                          | 15.22 | 12.93 | 0.16              | 9.66             | 0.52 | 97.14 |
| 23    | c                | 38.47               | 1.63             | 17.51                          | 14.66 | 13.51 | 0.24              | 9.62             | 0.69 | 96.33 |
| 23    | r                | 39.04               | 1.75             | 17.17                          | 15.02 | 13.33 | 0.15              | 9.85             | 0.53 | 96.84 |
| 24    | c                | 38.51               | 1.53             | 17.25                          | 15.96 | 12.98 | 0.19              | 9.21             | 0.18 | 95.81 |
| 24    | r                | 38.21               | 1.74             | 16.76                          | 15.72 | 13.20 | 0.13              | 9.56             | <DL  | 95.32 |
| 25    | c                | 38.79               | 1.52             | 17.79                          | 14.47 | 13.35 | 0.33              | 9.58             | 0.24 | 96.07 |
| 25    | r                | 39.18               | 1.56             | 17.32                          | 14.70 | 12.59 | 0.21              | 9.63             | 0.18 | 95.37 |
| 26    | c                | 39.02               | 1.50             | 17.28                          | 14.84 | 13.13 | 0.23              | 9.58             | 0.34 | 95.93 |
| 26    | r                | 38.47               | 1.56             | 17.09                          | 14.97 | 13.33 | 0.11              | 9.85             | 0.44 | 95.82 |
| 27    | c                | 38.84               | 1.63             | 17.59                          | 14.97 | 13.00 | 0.20              | 9.65             | <DL  | 95.88 |
| 27    | r                | 38.83               | 1.72             | 17.33                          | 14.73 | 13.04 | 0.19              | 9.74             | 0.28 | 95.85 |
| 28    | c                | 39.60               | 1.48             | 17.67                          | 14.43 | 13.38 | 0.14              | 9.40             | 0.56 | 96.66 |
| 28    | r                | 38.63               | 1.58             | 17.49                          | 14.77 | 13.60 | 0.19              | 9.43             | 0.23 | 95.92 |
| 29    | c                | 38.87               | 1.46             | 17.71                          | 15.63 | 13.36 | 0.21              | 9.74             | 0.66 | 97.64 |
| 29    | r                | 38.94               | 1.54             | 17.41                          | 15.51 | 13.14 | 0.20              | 9.12             | 0.65 | 96.50 |
| 30    | c                | 39.15               | 1.48             | 17.53                          | 15.35 | 13.17 | 0.23              | 9.60             | 0.25 | 96.76 |
| 30    | r                | 38.81               | 1.62             | 17.09                          | 15.17 | 12.93 | 0.21              | 9.57             | <DL  | 95.40 |

Abbreviations: <DL = below detection limits, n.a. = not analyzed. CaO and MnO were ≤ DL.

Data represents the green biotite fraction of sample 12004

<sup>1</sup> Core (c) or rim (r) of grains.

**Appendix D:** Biotite major element data (sample 12004).

| Grain | c/r <sup>1</sup> | Cation content (pfu; O=11) |       |       |       |       |       |       |       | Total |
|-------|------------------|----------------------------|-------|-------|-------|-------|-------|-------|-------|-------|
|       |                  | Si                         | Ti    | Al    | Fe    | Mg    | Na    | K     | Ba    |       |
| 1     | c                | 2.845                      | 0.087 | 1.494 | 0.925 | 1.485 | 0.032 | 0.903 | 0.008 | 7.786 |
| 1     | r                | 2.867                      | 0.091 | 1.489 | 0.902 | 1.462 | 0.024 | 0.911 | 0.009 | 7.763 |
| 2     | c                | 2.862                      | 0.080 | 1.520 | 0.931 | 1.421 | 0.022 | 0.888 | 0.018 | 7.751 |
| 2     | r                | 2.864                      | 0.082 | 1.527 | 0.918 | 1.419 | 0.026 | 0.897 | 0.014 | 7.752 |
| 3     | c                | 2.873                      | 0.077 | 1.513 | 0.892 | 1.463 | 0.023 | 0.887 | 0.008 | 7.747 |
| 3     | r                | 2.853                      | 0.079 | 1.522 | 0.885 | 1.479 | 0.026 | 0.897 | 0.014 | 7.768 |
| 4     | c                | 2.833                      | 0.089 | 1.528 | 0.931 | 1.444 | 0.035 | 0.896 | 0.012 | 7.777 |
| 4     | r                | 2.873                      | 0.092 | 1.483 | 0.914 | 1.455 | 0.011 | 0.918 | 0.004 | 7.756 |
| 5     | c                | 2.863                      | 0.081 | 1.511 | 0.898 | 1.462 | 0.035 | 0.883 | 0.017 | 7.758 |
| 5     | r                | 2.868                      | 0.095 | 1.483 | 0.892 | 1.453 | 0.032 | 0.916 | 0.015 | 7.765 |
| 6     | c                | 2.848                      | 0.094 | 1.472 | 0.925 | 1.481 | 0.024 | 0.932 | 0.004 | 7.796 |
| 6     | r                | 2.863                      | 0.092 | 1.478 | 0.912 | 1.467 | 0.029 | 0.913 | 0.008 | 7.773 |
| 7     | c                | 2.866                      | 0.086 | 1.487 | 0.940 | 1.438 | 0.038 | 0.900 | 0.006 | 7.772 |
| 7     | r                | 2.892                      | 0.087 | 1.502 | 0.914 | 1.393 | 0.024 | 0.886 | 0.011 | 7.721 |
| 8     | c                | 2.835                      | 0.094 | 1.521 | 0.870 | 1.536 | 0.023 | 0.868 | 0.002 | 7.756 |
| 8     | r                | 2.850                      | 0.095 | 1.505 | 0.868 | 1.485 | 0.032 | 0.937 | 0.004 | 7.786 |
| 9     | c                | 2.879                      | 0.081 | 1.480 | 0.919 | 1.478 | 0.024 | 0.856 | 0.009 | 7.737 |
| 9     | r                | 2.873                      | 0.088 | 1.487 | 0.917 | 1.432 | 0.042 | 0.903 | 0.011 | 7.765 |
| 10    | c                | 2.895                      | 0.072 | 1.511 | 0.905 | 1.426 | 0.032 | 0.891 | 0.006 | 7.738 |
| 10    | r                | 2.852                      | 0.073 | 1.516 | 0.898 | 1.497 | 0.024 | 0.900 | 0.011 | 7.778 |
| 11    | c                | 2.858                      | 0.092 | 1.490 | 0.925 | 1.457 | 0.040 | 0.899 | 0.005 | 7.774 |
| 11    | r                | 2.859                      | 0.096 | 1.543 | 0.907 | 1.381 | 0.029 | 0.906 | 0.009 | 7.740 |
| 12    | c                | 2.852                      | 0.087 | 1.514 | 0.937 | 1.433 | 0.014 | 0.892 | 0.014 | 7.755 |
| 12    | r                | 2.838                      | 0.096 | 1.508 | 0.918 | 1.484 | 0.019 | 0.860 | 0.011 | 7.748 |
| 13    | c                | 2.869                      | 0.076 | 1.514 | 0.851 | 1.512 | 0.032 | 0.890 | 0.006 | 7.758 |
| 13    | r                | 2.876                      | 0.084 | 1.451 | 0.884 | 1.539 | 0.031 | 0.886 | 0.011 | 7.773 |
| 14    | c                | 2.860                      | 0.088 | 1.484 | 0.973 | 1.442 | 0.023 | 0.876 | 0.009 | 7.760 |
| 14    | r                | 2.853                      | 0.088 | 1.465 | 0.979 | 1.423 | 0.023 | 0.930 | 0.022 | 7.801 |
| 15    | c                | 2.859                      | 0.087 | 1.500 | 0.933 | 1.437 | 0.026 | 0.894 | 0.017 | 7.762 |
| 15    | r                | 2.843                      | 0.088 | 1.516 | 0.932 | 1.465 | 0.030 | 0.869 | 0.006 | 7.757 |
| 16    | c                | 2.869                      | 0.080 | 1.507 | 0.925 | 1.447 | 0.031 | 0.875 | 0.007 | 7.748 |
| 16    | r                | 2.853                      | 0.088 | 1.499 | 0.892 | 1.484 | 0.033 | 0.897 | 0.009 | 7.771 |
| 17    | c                | 2.845                      | 0.092 | 1.522 | 0.918 | 1.429 | 0.032 | 0.915 | 0.009 | 7.772 |
| 17    | r                | 2.829                      | 0.095 | 1.498 | 0.935 | 1.476 | 0.026 | 0.902 | 0.007 | 7.785 |
| 18    | c                | 2.877                      | 0.090 | 1.490 | 0.916 | 1.438 | 0.023 | 0.898 | 0.006 | 7.748 |
| 18    | r                | 2.842                      | 0.097 | 1.476 | 0.944 | 1.481 | 0.023 | 0.907 | 0.008 | 7.786 |
| 19    | c                | 2.866                      | 0.081 | 1.518 | 0.921 | 1.427 | 0.039 | 0.890 | 0.008 | 7.757 |
| 19    | r                | 2.858                      | 0.086 | 1.492 | 0.914 | 1.470 | 0.032 | 0.897 | 0.014 | 7.772 |
| 20    | c                | 2.876                      | 0.093 | 1.495 | 0.892 | 1.462 | 0.017 | 0.872 | 0.008 | 7.725 |
| 20    | r                | 2.878                      | 0.087 | 1.517 | 0.901 | 1.419 | 0.032 | 0.880 | 0.006 | 7.731 |
| 21    | c                | 2.880                      | 0.081 | 1.494 | 0.941 | 1.424 | 0.030 | 0.899 | 0.000 | 7.755 |
| 21    | r                | 2.896                      | 0.086 | 1.502 | 0.921 | 1.399 | 0.022 | 0.875 | 0.006 | 7.713 |
| 22    | c                | 2.858                      | 0.076 | 1.512 | 0.944 | 1.430 | 0.040 | 0.892 | 0.014 | 7.773 |
| 22    | r                | 2.865                      | 0.088 | 1.520 | 0.927 | 1.404 | 0.022 | 0.898 | 0.015 | 7.746 |
| 23    | c                | 2.829                      | 0.090 | 1.518 | 0.902 | 1.481 | 0.034 | 0.903 | 0.020 | 7.788 |
| 23    | r                | 2.857                      | 0.096 | 1.481 | 0.919 | 1.454 | 0.021 | 0.920 | 0.015 | 7.774 |
| 24    | c                | 2.848                      | 0.085 | 1.503 | 0.987 | 1.431 | 0.028 | 0.869 | 0.005 | 7.763 |
| 24    | r                | 2.842                      | 0.097 | 1.469 | 0.978 | 1.463 | 0.019 | 0.907 | 0.004 | 7.787 |
| 25    | c                | 2.846                      | 0.084 | 1.538 | 0.888 | 1.460 | 0.047 | 0.897 | 0.007 | 7.772 |
| 25    | r                | 2.894                      | 0.087 | 1.508 | 0.908 | 1.386 | 0.030 | 0.908 | 0.005 | 7.734 |
| 26    | c                | 2.873                      | 0.083 | 1.499 | 0.914 | 1.441 | 0.033 | 0.900 | 0.010 | 7.759 |
| 26    | r                | 2.847                      | 0.087 | 1.490 | 0.926 | 1.470 | 0.016 | 0.930 | 0.013 | 7.791 |
| 27    | c                | 2.854                      | 0.090 | 1.523 | 0.920 | 1.424 | 0.029 | 0.904 | 0.001 | 7.758 |
| 27    | r                | 2.859                      | 0.095 | 1.504 | 0.907 | 1.432 | 0.027 | 0.915 | 0.008 | 7.760 |
| 28    | c                | 2.882                      | 0.081 | 1.516 | 0.878 | 1.452 | 0.020 | 0.873 | 0.016 | 7.723 |
| 28    | r                | 2.841                      | 0.087 | 1.516 | 0.909 | 1.491 | 0.028 | 0.885 | 0.007 | 7.769 |
| 29    | c                | 2.831                      | 0.080 | 1.520 | 0.952 | 1.451 | 0.030 | 0.905 | 0.019 | 7.795 |
| 29    | r                | 2.858                      | 0.085 | 1.506 | 0.952 | 1.438 | 0.028 | 0.854 | 0.019 | 7.745 |
| 30    | c                | 2.860                      | 0.081 | 1.509 | 0.938 | 1.434 | 0.033 | 0.895 | 0.007 | 7.766 |
| 30    | r                | 2.872                      | 0.090 | 1.491 | 0.939 | 1.427 | 0.031 | 0.904 | 0.000 | 7.758 |

Data represents the green biotite fraction of sample 12004

<sup>1</sup> Core (c) or rim (r) of grains.
