# Supplementary material
Source: publisher figshare collection journal article supplement (https://geolsoc.figshare.com/articles/dataset/_/3454952)
Supplement: Supplementary file 5 [file 1]

**Appendix C:** Phengite major element data (sample 08007).

| Grain | c/r <sup>1</sup> | Oxide content (wt%) |                  |                                |      |      |                   |                  |      | Total |
|-------|------------------|---------------------|------------------|--------------------------------|------|------|-------------------|------------------|------|-------|
|       |                  | SiO <sub>2</sub>    | TiO <sub>2</sub> | Al <sub>2</sub> O <sub>3</sub> | FeO  | MgO  | Na <sub>2</sub> O | K <sub>2</sub> O | BaO  |       |
| 1     | c                | 46.52               | 0.68             | 30.85                          | 3.05 | 1.03 | 0.65              | 10.47            | 0.32 | 93.56 |
| 1     | r                | 47.57               | 0.83             | 30.55                          | 2.61 | 1.15 | 0.79              | 10.38            | 0.14 | 94.04 |
| 2     | c                | 50.68               | 0.30             | 27.45                          | 3.22 | 2.40 | 0.60              | 10.28            | 0.30 | 95.23 |
| 2     | r                | 50.06               | 0.33             | 26.80                          | 2.90 | 2.57 | 0.61              | 10.34            | 0.39 | 94.00 |
| 3     | c                | 50.78               | 0.50             | 27.44                          | 3.34 | 2.38 | 0.49              | 10.62            | 0.37 | 95.92 |
| 3     | r                | 49.88               | 0.44             | 27.52                          | 2.86 | 2.29 | 0.56              | 10.33            | 0.16 | 94.04 |
| 4     | c                | 49.99               | 0.37             | 28.15                          | 3.39 | 2.34 | 0.63              | 10.37            | 0.36 | 95.60 |
| 4     | r                | 47.03               | 0.63             | 31.05                          | 3.09 | 1.25 | 0.85              | 10.10            | 0.58 | 94.57 |
| 5     | c                | 50.59               | 0.32             | 27.27                          | 2.97 | 2.58 | 0.61              | 10.50            | 0.21 | 95.05 |
| 5     | r                | 50.12               | 0.34             | 27.42                          | 3.06 | 2.43 | 0.61              | 10.09            | 0.38 | 94.45 |
| 6     | c                | 47.00               | 1.00             | 31.15                          | 3.20 | 1.12 | 0.60              | 10.49            | 0.52 | 95.08 |
| 6     | r                | 47.52               | 1.06             | 31.13                          | 2.74 | 1.27 | 0.71              | 10.13            | 0.52 | 95.07 |
| 7     | c                | 50.85               | 0.33             | 27.00                          | 2.88 | 2.68 | 0.58              | 10.07            | 0.25 | 94.64 |
| 7     | r                | 50.40               | 0.33             | 26.42                          | 2.84 | 2.69 | 0.58              | 10.28            | 0.55 | 94.09 |
| 8     | c                | 50.70               | 0.28             | 27.69                          | 3.13 | 2.43 | 0.59              | 10.36            | 0.50 | 95.67 |
| 8     | r                | 50.10               | 0.31             | 27.02                          | 3.23 | 2.46 | 0.61              | 10.37            | 0.43 | 94.53 |
| 9     | c                | 50.59               | 0.27             | 26.99                          | 3.43 | 2.23 | 0.60              | 10.29            | 0.00 | 94.40 |
| 9     | r                | 50.44               | 0.41             | 27.36                          | 3.45 | 2.33 | 0.65              | 9.96             | 0.34 | 94.94 |
| 10    | c                | 46.40               | 0.96             | 30.38                          | 3.08 | 1.08 | 0.47              | 10.62            | 0.50 | 93.49 |
| 10    | r                | 48.30               | 0.52             | 27.78                          | 3.14 | 1.91 | 0.51              | 10.50            | 0.49 | 93.15 |
| 11    | c                | 49.31               | 0.25             | 26.98                          | 3.27 | 2.29 | 0.68              | 10.11            | 0.27 | 93.16 |
| 11    | r                | 49.92               | 0.46             | 26.21                          | 3.37 | 2.51 | 0.58              | 10.32            | 0.31 | 93.68 |
| 12    | c                | 48.78               | 0.34             | 26.85                          | 3.45 | 2.17 | 0.52              | 10.12            | 0.62 | 92.85 |
| 12    | r                | 49.75               | 0.67             | 26.40                          | 3.09 | 2.16 | 0.60              | 9.79             | 0.23 | 92.68 |
| 13    | c                | 49.94               | 0.30             | 26.56                          | 3.14 | 2.41 | 0.64              | 10.22            | 0.55 | 93.75 |
| 13    | r                | 49.44               | 0.35             | 26.14                          | 2.99 | 2.59 | 0.55              | 10.22            | 0.46 | 92.73 |
| 14    | c                | 46.18               | 1.25             | 30.33                          | 3.52 | 1.15 | 0.43              | 10.70            | 0.91 | 94.46 |
| 14    | r                | 46.18               | 1.39             | 29.32                          | 3.21 | 1.33 | 0.65              | 10.30            | 0.84 | 93.22 |
| 15    | c                | 48.81               | 0.61             | 28.21                          | 3.21 | 2.07 | 0.79              | 10.06            | 0.29 | 94.05 |
| 15    | r                | 46.03               | 0.98             | 29.06                          | 3.01 | 1.26 | 0.75              | 9.62             | 0.53 | 91.24 |
| 16    | c                | 46.33               | 0.91             | 30.70                          | 3.13 | 1.17 | 0.69              | 10.40            | 0.52 | 93.84 |
| 16    | r                | 46.37               | 0.97             | 29.78                          | 3.29 | 1.25 | 0.56              | 10.43            | 0.36 | 93.01 |
| 17    | c                | 49.26               | 0.29             | 25.79                          | 3.02 | 2.26 | 0.66              | 10.16            | 0.48 | 91.92 |
| 17    | r                | 46.54               | 1.06             | 29.02                          | 2.89 | 1.13 | 0.83              | 9.75             | 0.45 | 91.67 |
| 18    | c                | 48.87               | 0.38             | 26.61                          | 3.26 | 2.03 | 0.71              | 9.83             | 0.43 | 92.12 |
| 18    | r                | 48.59               | 0.51             | 27.13                          | 3.21 | 2.02 | 0.71              | 9.91             | 0.22 | 92.31 |
| 19    | c                | 46.27               | 0.70             | 29.64                          | 3.22 | 1.14 | 0.88              | 10.06            | 0.49 | 92.40 |
| 19    | r                | 47.53               | 0.70             | 30.48                          | 3.04 | 1.40 | 0.77              | 10.06            | 0.42 | 94.40 |
| 20    | c                | 45.71               | 1.16             | 29.25                          | 3.59 | 1.07 | 0.62              | 10.23            | 0.68 | 92.31 |
| 20    | r                | 46.60               | 0.77             | 29.57                          | 3.18 | 1.16 | 0.80              | 9.92             | 0.50 | 92.50 |
| 21    | c                | 47.04               | 1.33             | 28.92                          | 3.47 | 1.30 | 0.76              | 9.71             | 0.64 | 93.18 |
| 21    | r                | 46.65               | 0.68             | 29.22                          | 3.53 | 1.19 | 0.83              | 9.95             | 0.52 | 92.57 |
| 22    | c                | 49.73               | 0.24             | 26.38                          | 3.52 | 2.41 | 0.62              | 10.13            | 0.42 | 93.44 |
| 22    | r                | 46.84               | 0.99             | 29.14                          | 3.33 | 1.26 | 0.83              | 9.91             | 0.43 | 92.73 |
| 23    | c                | 48.13               | 0.58             | 26.74                          | 3.01 | 2.12 | 0.76              | 10.01            | 0.36 | 91.71 |
| 23    | r                | 48.56               | 0.63             | 26.24                          | 2.88 | 2.15 | 0.64              | 10.02            | 0.53 | 91.65 |
| 24    | c                | 48.34               | 0.32             | 27.77                          | 3.44 | 2.08 | 0.74              | 10.10            | 0.28 | 93.07 |
| 24    | r                | 48.00               | 0.70             | 26.62                          | 2.97 | 1.98 | 0.65              | 10.37            | 0.29 | 91.59 |
| 25    | c                | 50.08               | 0.29             | 26.53                          | 3.19 | 2.56 | 0.61              | 10.41            | 0.50 | 94.17 |
| 25    | r                | 45.53               | 0.44             | 29.38                          | 3.08 | 1.23 | 0.74              | 9.69             | 0.88 | 90.95 |
| 26    | c                | 45.63               | 0.64             | 29.89                          | 3.22 | 1.24 | 0.76              | 9.71             | 0.62 | 91.71 |
| 26    | r                | 46.45               | 0.62             | 29.12                          | 3.09 | 1.41 | 0.85              | 9.57             | 0.55 | 91.67 |
| 27    | c                | 49.09               | 0.23             | 26.63                          | 2.72 | 2.63 | 0.70              | 10.23            | 0.36 | 92.59 |
| 27    | r                | 46.25               | 0.33             | 29.55                          | 2.87 | 1.39 | 0.73              | 10.05            | 0.35 | 91.51 |
| 28    | c                | 49.88               | 0.39             | 27.05                          | 3.05 | 2.33 | 0.54              | 10.39            | 0.42 | 94.05 |
| 28    | r                | 47.57               | 0.62             | 27.33                          | 2.82 | 1.78 | 0.69              | 10.13            | 0.55 | 91.48 |
| 29    | c                | 49.03               | 0.55             | 26.68                          | 3.05 | 2.26 | 0.69              | 10.10            | 0.36 | 92.72 |
| 29    | r                | 46.54               | 0.95             | 29.58                          | 2.85 | 1.07 | 0.84              | 9.92             | 0.53 | 92.28 |
| 30    | c                | 50.05               | 0.33             | 27.64                          | 2.95 | 2.44 | 0.65              | 10.43            | 0.44 | 94.93 |
| 30    | r                | 46.27               | 0.94             | 30.42                          | 3.09 | 1.08 | 0.93              | 10.01            | 0.11 | 92.73 |

Abbreviations: <DL = below detection limits, n.a. = not analyzed. CaO and MnO mostly close to or below DL.

<sup>1</sup> Core (c) or rim (r) of grains.

**Appendix C:** Phengite major element data (sample 08007).

| Grain | c/r <sup>1</sup> | Cation content (pfu; O=11) |       |      |       |       |       |       |       | Total |
|-------|------------------|----------------------------|-------|------|-------|-------|-------|-------|-------|-------|
|       |                  | Si                         | Ti    | Al   | Fe    | Mg    | Na    | K     | Ba    |       |
| 1     | c                | 3.20                       | 0.035 | 2.50 | 0.175 | 0.105 | 0.086 | 0.918 | 0.002 | 7.02  |
| 1     | r                | 3.24                       | 0.043 | 2.45 | 0.148 | 0.117 | 0.105 | 0.901 | 0.001 | 7.00  |
| 2     | c                | 3.40                       | 0.015 | 2.17 | 0.181 | 0.240 | 0.079 | 0.880 | 0.002 | 6.97  |
| 2     | r                | 3.41                       | 0.017 | 2.15 | 0.165 | 0.261 | 0.081 | 0.898 | 0.003 | 6.98  |
| 3     | c                | 3.39                       | 0.025 | 2.16 | 0.187 | 0.237 | 0.063 | 0.906 | 0.002 | 6.98  |
| 3     | r                | 3.39                       | 0.023 | 2.20 | 0.162 | 0.232 | 0.074 | 0.894 | 0.001 | 6.97  |
| 4     | c                | 3.35                       | 0.019 | 2.23 | 0.190 | 0.234 | 0.082 | 0.887 | 0.002 | 6.99  |
| 4     | r                | 3.20                       | 0.032 | 2.49 | 0.176 | 0.127 | 0.111 | 0.876 | 0.004 | 7.01  |
| 5     | c                | 3.40                       | 0.016 | 2.16 | 0.167 | 0.259 | 0.079 | 0.901 | 0.001 | 6.99  |
| 5     | r                | 3.39                       | 0.017 | 2.19 | 0.173 | 0.245 | 0.080 | 0.871 | 0.002 | 6.97  |
| 6     | c                | 3.18                       | 0.051 | 2.49 | 0.181 | 0.113 | 0.078 | 0.906 | 0.003 | 7.00  |
| 6     | r                | 3.20                       | 0.054 | 2.47 | 0.154 | 0.127 | 0.093 | 0.871 | 0.003 | 6.98  |
| 7     | c                | 3.42                       | 0.017 | 2.14 | 0.162 | 0.269 | 0.075 | 0.865 | 0.002 | 6.95  |
| 7     | r                | 3.43                       | 0.017 | 2.12 | 0.162 | 0.273 | 0.077 | 0.892 | 0.004 | 6.97  |
| 8     | c                | 3.39                       | 0.014 | 2.18 | 0.175 | 0.242 | 0.076 | 0.884 | 0.003 | 6.97  |
| 8     | r                | 3.40                       | 0.016 | 2.16 | 0.183 | 0.249 | 0.080 | 0.897 | 0.003 | 6.99  |
| 9     | c                | 3.42                       | 0.014 | 2.15 | 0.194 | 0.225 | 0.079 | 0.888 | 0.000 | 6.97  |
| 9     | r                | 3.40                       | 0.021 | 2.17 | 0.194 | 0.234 | 0.084 | 0.856 | 0.002 | 6.96  |
| 10    | c                | 3.20                       | 0.050 | 2.47 | 0.178 | 0.111 | 0.063 | 0.934 | 0.003 | 7.01  |
| 10    | r                | 3.33                       | 0.027 | 2.26 | 0.181 | 0.197 | 0.069 | 0.925 | 0.003 | 7.00  |
| 11    | c                | 3.39                       | 0.013 | 2.19 | 0.188 | 0.235 | 0.090 | 0.886 | 0.002 | 6.99  |
| 11    | r                | 3.42                       | 0.024 | 2.11 | 0.193 | 0.256 | 0.077 | 0.901 | 0.002 | 6.98  |
| 12    | c                | 3.38                       | 0.018 | 2.19 | 0.200 | 0.224 | 0.070 | 0.894 | 0.004 | 6.98  |
| 12    | r                | 3.42                       | 0.034 | 2.14 | 0.178 | 0.222 | 0.080 | 0.859 | 0.001 | 6.94  |
| 13    | c                | 3.42                       | 0.015 | 2.14 | 0.180 | 0.246 | 0.084 | 0.892 | 0.004 | 6.98  |
| 13    | r                | 3.42                       | 0.018 | 2.13 | 0.173 | 0.267 | 0.074 | 0.901 | 0.003 | 6.98  |
| 14    | c                | 3.17                       | 0.065 | 2.46 | 0.202 | 0.118 | 0.057 | 0.938 | 0.006 | 7.01  |
| 14    | r                | 3.21                       | 0.073 | 2.40 | 0.186 | 0.138 | 0.088 | 0.912 | 0.005 | 7.01  |
| 15    | c                | 3.32                       | 0.031 | 2.26 | 0.183 | 0.210 | 0.105 | 0.874 | 0.002 | 6.99  |
| 15    | r                | 3.24                       | 0.052 | 2.41 | 0.177 | 0.133 | 0.102 | 0.863 | 0.003 | 6.98  |
| 16    | c                | 3.18                       | 0.047 | 2.49 | 0.180 | 0.120 | 0.091 | 0.911 | 0.003 | 7.02  |
| 16    | r                | 3.21                       | 0.050 | 2.43 | 0.191 | 0.129 | 0.075 | 0.922 | 0.002 | 7.01  |
| 17    | c                | 3.43                       | 0.015 | 2.12 | 0.176 | 0.235 | 0.089 | 0.904 | 0.003 | 6.98  |
| 17    | r                | 3.26                       | 0.056 | 2.39 | 0.169 | 0.117 | 0.113 | 0.870 | 0.003 | 6.98  |
| 18    | c                | 3.40                       | 0.020 | 2.18 | 0.190 | 0.210 | 0.096 | 0.872 | 0.003 | 6.97  |
| 18    | r                | 3.37                       | 0.027 | 2.22 | 0.186 | 0.209 | 0.096 | 0.876 | 0.001 | 6.98  |
| 19    | c                | 3.22                       | 0.037 | 2.43 | 0.188 | 0.119 | 0.119 | 0.894 | 0.003 | 7.02  |
| 19    | r                | 3.23                       | 0.036 | 2.44 | 0.173 | 0.142 | 0.101 | 0.872 | 0.003 | 6.99  |
| 20    | c                | 3.21                       | 0.061 | 2.42 | 0.211 | 0.111 | 0.085 | 0.915 | 0.004 | 7.01  |
| 20    | r                | 3.24                       | 0.040 | 2.42 | 0.185 | 0.120 | 0.108 | 0.879 | 0.003 | 6.99  |
| 21    | c                | 3.25                       | 0.069 | 2.35 | 0.200 | 0.134 | 0.102 | 0.856 | 0.004 | 6.97  |
| 21    | r                | 3.25                       | 0.036 | 2.40 | 0.205 | 0.124 | 0.111 | 0.883 | 0.003 | 7.01  |
| 22    | c                | 3.41                       | 0.012 | 2.13 | 0.202 | 0.247 | 0.082 | 0.887 | 0.003 | 6.98  |
| 22    | r                | 3.25                       | 0.051 | 2.38 | 0.193 | 0.131 | 0.112 | 0.877 | 0.003 | 7.00  |
| 23    | c                | 3.36                       | 0.030 | 2.20 | 0.176 | 0.221 | 0.103 | 0.893 | 0.002 | 6.99  |
| 23    | r                | 3.40                       | 0.033 | 2.16 | 0.168 | 0.224 | 0.087 | 0.894 | 0.003 | 6.97  |
| 24    | c                | 3.33                       | 0.016 | 2.26 | 0.198 | 0.214 | 0.099 | 0.889 | 0.002 | 7.01  |
| 24    | r                | 3.36                       | 0.037 | 2.20 | 0.174 | 0.207 | 0.088 | 0.927 | 0.002 | 7.00  |
| 25    | c                | 3.41                       | 0.015 | 2.13 | 0.182 | 0.260 | 0.080 | 0.905 | 0.003 | 6.99  |
| 25    | r                | 3.23                       | 0.023 | 2.45 | 0.182 | 0.129 | 0.101 | 0.876 | 0.006 | 7.00  |
| 26    | c                | 3.20                       | 0.034 | 2.47 | 0.189 | 0.129 | 0.104 | 0.869 | 0.004 | 7.00  |
| 26    | r                | 3.25                       | 0.033 | 2.40 | 0.181 | 0.147 | 0.116 | 0.855 | 0.004 | 6.99  |
| 27    | c                | 3.39                       | 0.012 | 2.17 | 0.157 | 0.271 | 0.093 | 0.902 | 0.002 | 7.00  |
| 27    | r                | 3.24                       | 0.018 | 2.44 | 0.168 | 0.145 | 0.099 | 0.899 | 0.002 | 7.01  |
| 28    | c                | 3.40                       | 0.020 | 2.17 | 0.174 | 0.237 | 0.072 | 0.903 | 0.003 | 6.98  |
| 28    | r                | 3.34                       | 0.033 | 2.26 | 0.166 | 0.186 | 0.093 | 0.907 | 0.004 | 6.99  |
| 29    | c                | 3.39                       | 0.029 | 2.17 | 0.176 | 0.233 | 0.092 | 0.890 | 0.002 | 6.98  |
| 29    | r                | 3.24                       | 0.050 | 2.43 | 0.166 | 0.111 | 0.113 | 0.880 | 0.003 | 6.99  |
| 30    | c                | 3.38                       | 0.017 | 2.20 | 0.166 | 0.245 | 0.085 | 0.898 | 0.003 | 6.99  |
| 30    | r                | 3.20                       | 0.049 | 2.48 | 0.179 | 0.111 | 0.124 | 0.882 | 0.000 | 7.02  |

<sup>1</sup> Core (c) or rim (r) of grains.

**Appendix C:** Phengite major element data (sample 08008c).

| Grain | c/ <sup>2</sup> r | Oxide content (wt%) |                  | Al <sub>2</sub> O <sub>3</sub> | FeO  | MgO  | Na <sub>2</sub> O | K <sub>2</sub> O | BaO  | Total |
|-------|-------------------|---------------------|------------------|--------------------------------|------|------|-------------------|------------------|------|-------|
|       |                   | SiO <sub>2</sub>    | TiO <sub>2</sub> |                                |      |      |                   |                  |      |       |
| 1     | c                 | 47.97               | 0.91             | 30.75                          | 4.56 | 1.66 | 0.31              | 10.62            | n.a. | 96.78 |
| 1     | r                 | 47.04               | 1.03             | 30.21                          | 4.65 | 1.58 | 0.35              | 10.94            | n.a. | 95.80 |
| 2     | c                 | 46.27               | 1.13             | 31.10                          | 4.74 | 1.40 | 0.31              | 10.84            | n.a. | 95.79 |
| 2     | r                 | 47.00               | 0.73             | 30.41                          | 4.21 | 1.49 | 0.21              | 11.21            | n.a. | 95.26 |
| 3     | c                 | 47.07               | 1.09             | 32.31                          | 4.16 | 1.14 | 0.33              | 10.82            | n.a. | 96.92 |
| 3     | r                 | 45.98               | 1.25             | 31.22                          | 4.57 | 1.28 | 0.43              | 10.67            | n.a. | 95.41 |
| 4     | c                 | 47.03               | 1.21             | 31.20                          | 4.21 | 1.30 | 0.30              | 10.78            | n.a. | 96.04 |
| 4     | r                 | 47.63               | 1.07             | 30.93                          | 4.32 | 1.38 | 0.35              | 10.83            | n.a. | 96.52 |
| 5     | c                 | 47.82               | 0.94             | 30.39                          | 4.44 | 1.45 | 0.32              | 11.10            | n.a. | 96.45 |
| 5     | r                 | 47.40               | 0.83             | 30.22                          | 4.77 | 1.68 | 0.29              | 11.05            | n.a. | 96.24 |
| 6     | c                 | 48.18               | 0.99             | 31.03                          | 3.98 | 1.85 | 0.27              | 10.81            | n.a. | 97.11 |
| 6     | r                 | 47.82               | 0.86             | 30.48                          | 3.94 | 1.74 | 0.16              | 10.79            | n.a. | 95.79 |
| 7     | c                 | 47.83               | 1.05             | 31.04                          | 4.42 | 1.55 | 0.30              | 10.85            | n.a. | 97.04 |
| 7     | r                 | 48.67               | 0.94             | 30.36                          | 4.40 | 1.83 | 0.27              | 10.83            | n.a. | 97.31 |
| 8     | c                 | 47.47               | 0.81             | 31.43                          | 3.98 | 1.44 | 0.28              | 10.89            | n.a. | 96.30 |
| 8     | r                 | 48.34               | 0.73             | 31.04                          | 4.03 | 1.60 | 0.29              | 10.82            | n.a. | 96.85 |
| 9     | c                 | 47.11               | 1.18             | 31.40                          | 4.84 | 1.45 | 0.44              | 10.80            | n.a. | 97.21 |
| 9     | r                 | 47.46               | 1.12             | 31.17                          | 4.54 | 1.41 | 0.41              | 10.97            | n.a. | 97.08 |
| 10    | c                 | 47.62               | 0.70             | 30.64                          | 4.96 | 1.65 | 0.36              | 10.97            | n.a. | 96.89 |
| 10    | r                 | 48.19               | 0.93             | 31.79                          | 4.83 | 1.38 | 0.32              | 10.85            | n.a. | 98.29 |
| 11    | c                 | 46.55               | 1.06             | 30.37                          | 4.75 | 1.60 | 0.36              | 10.86            | n.a. | 95.55 |
| 11    | r                 | 48.01               | 0.89             | 30.89                          | 4.43 | 1.61 | 0.37              | 10.84            | n.a. | 97.04 |
| 12    | c                 | 47.75               | 0.70             | 31.28                          | 4.68 | 1.60 | 0.27              | 10.77            | n.a. | 97.06 |
| 12    | r                 | 47.75               | 1.04             | 30.47                          | 5.03 | 1.57 | 0.26              | 10.60            | n.a. | 96.72 |
| 13    | c                 | 47.39               | 0.77             | 30.57                          | 4.77 | 1.58 | 0.32              | 10.98            | n.a. | 96.38 |
| 13    | r                 | 48.22               | 0.60             | 31.09                          | 4.54 | 1.47 | 0.33              | 11.12            | n.a. | 97.38 |
| 14    | c                 | 48.30               | 0.80             | 31.09                          | 4.39 | 1.73 | 0.23              | 10.79            | n.a. | 97.34 |
| 14    | r                 | 49.09               | 0.83             | 31.46                          | 3.88 | 1.71 | 0.21              | 10.82            | n.a. | 98.00 |
| 15    | c                 | 47.61               | 1.18             | 32.27                          | 4.23 | 1.26 | 0.27              | 10.78            | n.a. | 97.60 |
| 15    | r                 | 47.42               | 0.94             | 30.34                          | 4.53 | 1.46 | 0.32              | 11.13            | n.a. | 96.14 |
| 16    | c                 | 47.75               | 0.96             | 30.55                          | 4.60 | 1.56 | 0.30              | 10.89            | n.a. | 96.61 |
| 16    | r                 | 47.44               | 0.47             | 30.89                          | 4.36 | 1.66 | 0.25              | 10.84            | n.a. | 95.91 |
| 17    | c                 | 47.87               | 0.61             | 31.89                          | 4.53 | 1.39 | 0.33              | 10.72            | n.a. | 97.34 |
| 17    | r                 | 48.17               | 0.38             | 32.14                          | 3.57 | 1.36 | 0.19              | 8.96             | n.a. | 94.77 |
| 18    | c                 | 47.50               | 0.80             | 31.39                          | 4.18 | 1.28 | 0.35              | 11.16            | n.a. | 96.65 |
| 18    | r                 | 48.29               | 0.80             | 31.09                          | 4.62 | 1.49 | 0.23              | 11.11            | n.a. | 97.63 |
| 19    | c                 | 47.30               | 0.91             | 30.50                          | 4.89 | 1.52 | 0.31              | 10.81            | n.a. | 96.24 |
| 19    | r                 | 46.74               | 0.55             | 31.15                          | 4.34 | 1.46 | 0.29              | 10.77            | n.a. | 95.31 |
| 20    | c                 | 47.25               | 1.40             | 31.63                          | 4.57 | 1.44 | 0.36              | 10.97            | n.a. | 97.61 |
| 20    | r                 | 47.46               | 0.77             | 31.36                          | 4.27 | 1.67 | 0.31              | 11.02            | n.a. | 96.87 |
| 21    | c                 | 47.98               | 0.84             | 30.78                          | 4.27 | 1.80 | 0.35              | 10.88            | n.a. | 96.89 |
| 21    | r                 | 47.30               | 0.89             | 30.61                          | 4.33 | 1.72 | 0.29              | 10.86            | n.a. | 96.00 |
| 22    | c                 | 47.33               | 1.02             | 30.72                          | 4.55 | 1.36 | 0.33              | 10.86            | n.a. | 96.17 |
| 22    | r                 | 47.79               | 0.93             | 30.90                          | 4.10 | 1.43 | 0.29              | 11.07            | n.a. | 96.52 |
| 23    | c                 | 47.85               | 1.01             | 29.26                          | 4.34 | 1.86 | 0.34              | 10.96            | n.a. | 95.62 |
| 23    | r                 | 48.21               | 1.06             | 31.13                          | 4.05 | 1.38 | 0.32              | 10.92            | n.a. | 97.08 |
| 24    | c                 | 48.45               | 0.91             | 30.54                          | 4.28 | 1.75 | 0.41              | 10.90            | n.a. | 97.24 |
| 24    | r                 | 47.11               | 0.55             | 30.58                          | 4.43 | 1.79 | 0.30              | 10.67            | n.a. | 95.43 |
| 25    | c                 | 46.68               | 0.90             | 30.81                          | 3.87 | 1.66 | 0.37              | 10.70            | n.a. | 94.99 |
| 25    | r                 | 47.20               | 0.67             | 30.87                          | 4.28 | 1.69 | 0.30              | 10.79            | n.a. | 95.80 |
| 26    | c                 | 48.49               | 1.11             | 32.22                          | 3.82 | 1.58 | 0.31              | 10.79            | n.a. | 98.32 |
| 26    | r                 | 48.43               | 0.63             | 31.77                          | 3.93 | 1.76 | 0.27              | 10.98            | n.a. | 97.77 |
| 27    | c                 | 47.10               | 1.17             | 31.36                          | 4.54 | 1.39 | 0.44              | 11.19            | n.a. | 97.19 |
| 27    | r                 | 47.55               | 1.08             | 31.73                          | 4.26 | 1.44 | 0.32              | 10.92            | n.a. | 97.30 |
| 28    | c                 | 46.38               | 1.20             | 30.04                          | 4.53 | 1.56 | 0.29              | 10.76            | n.a. | 94.76 |
| 28    | r                 | 46.54               | 0.98             | 30.16                          | 4.18 | 1.60 | 0.34              | 11.38            | n.a. | 95.18 |
| 29    | c                 | 48.03               | 1.08             | 30.98                          | 4.36 | 1.55 | 0.35              | 10.77            | n.a. | 97.13 |
| 29    | r                 | 47.66               | 0.74             | 30.47                          | 4.36 | 1.69 | 0.21              | 10.95            | n.a. | 96.08 |
| 30    | c                 | 47.86               | 1.01             | 30.79                          | 4.04 | 1.70 | 0.38              | 10.84            | n.a. | 96.61 |
| 30    | r                 | 47.08               | 0.85             | 30.90                          | 4.25 | 1.66 | 0.36              | 10.87            | n.a. | 95.97 |

Abbreviations: <DL = below detection limits, n.a. = not analyzed. CaO and MnO mostly close to or below DL.

Data represents the paramagnetic phengite fraction of sample 08008c.

<sup>2</sup> Core (c) or rim (r) of grains.

**Appendix C:** Phengite major element data (sample 08008c).

| Grain | c/r <sup>1</sup> | Cation content (pfu; O=11) |       |       |       |       |       |       |      | Total |
|-------|------------------|----------------------------|-------|-------|-------|-------|-------|-------|------|-------|
|       |                  | Si                         | Ti    | Al    | Fe    | Mg    | Na    | K     | Ba   |       |
| 1     | c                | 3.196                      | 0.046 | 2.415 | 0.254 | 0.165 | 0.040 | 0.903 | n.a. | 7.022 |
| 1     | r                | 3.180                      | 0.052 | 2.407 | 0.263 | 0.160 | 0.045 | 0.943 | n.a. | 7.058 |
| 2     | c                | 3.132                      | 0.057 | 2.481 | 0.268 | 0.141 | 0.041 | 0.936 | n.a. | 7.058 |
| 2     | r                | 3.191                      | 0.037 | 2.433 | 0.239 | 0.151 | 0.028 | 0.971 | n.a. | 7.054 |
| 3     | c                | 3.131                      | 0.054 | 2.533 | 0.231 | 0.113 | 0.042 | 0.918 | n.a. | 7.028 |
| 3     | r                | 3.120                      | 0.064 | 2.497 | 0.259 | 0.130 | 0.057 | 0.924 | n.a. | 7.057 |
| 4     | c                | 3.160                      | 0.061 | 2.470 | 0.237 | 0.130 | 0.039 | 0.924 | n.a. | 7.026 |
| 4     | r                | 3.184                      | 0.054 | 2.437 | 0.242 | 0.138 | 0.045 | 0.924 | n.a. | 7.027 |
| 5     | c                | 3.205                      | 0.047 | 2.401 | 0.249 | 0.144 | 0.041 | 0.949 | n.a. | 7.042 |
| 5     | r                | 3.191                      | 0.042 | 2.398 | 0.269 | 0.169 | 0.038 | 0.949 | n.a. | 7.061 |
| 6     | c                | 3.192                      | 0.049 | 2.423 | 0.220 | 0.183 | 0.035 | 0.914 | n.a. | 7.022 |
| 6     | r                | 3.211                      | 0.043 | 2.412 | 0.221 | 0.174 | 0.021 | 0.924 | n.a. | 7.012 |
| 7     | c                | 3.182                      | 0.052 | 2.433 | 0.246 | 0.153 | 0.039 | 0.921 | n.a. | 7.029 |
| 7     | r                | 3.225                      | 0.047 | 2.371 | 0.244 | 0.181 | 0.035 | 0.915 | n.a. | 7.018 |
| 8     | c                | 3.175                      | 0.041 | 2.478 | 0.223 | 0.143 | 0.037 | 0.929 | n.a. | 7.027 |
| 8     | r                | 3.209                      | 0.037 | 2.428 | 0.224 | 0.158 | 0.037 | 0.916 | n.a. | 7.017 |
| 9     | c                | 3.140                      | 0.059 | 2.467 | 0.270 | 0.144 | 0.056 | 0.918 | n.a. | 7.054 |
| 9     | r                | 3.163                      | 0.056 | 2.449 | 0.253 | 0.140 | 0.053 | 0.933 | n.a. | 7.048 |
| 10    | c                | 3.185                      | 0.035 | 2.416 | 0.277 | 0.164 | 0.047 | 0.936 | n.a. | 7.062 |
| 10    | r                | 3.168                      | 0.046 | 2.463 | 0.266 | 0.135 | 0.040 | 0.910 | n.a. | 7.030 |
| 11    | c                | 3.158                      | 0.054 | 2.428 | 0.269 | 0.162 | 0.047 | 0.940 | n.a. | 7.065 |
| 11    | r                | 3.192                      | 0.044 | 2.421 | 0.246 | 0.159 | 0.048 | 0.919 | n.a. | 7.037 |
| 12    | c                | 3.178                      | 0.035 | 2.453 | 0.260 | 0.159 | 0.035 | 0.914 | n.a. | 7.036 |
| 12    | r                | 3.191                      | 0.052 | 2.400 | 0.281 | 0.157 | 0.033 | 0.904 | n.a. | 7.024 |
| 13    | c                | 3.185                      | 0.039 | 2.421 | 0.268 | 0.158 | 0.042 | 0.941 | n.a. | 7.057 |
| 13    | r                | 3.199                      | 0.030 | 2.431 | 0.252 | 0.146 | 0.042 | 0.941 | n.a. | 7.045 |
| 14    | c                | 3.195                      | 0.040 | 2.424 | 0.243 | 0.171 | 0.030 | 0.911 | n.a. | 7.021 |
| 14    | r                | 3.214                      | 0.041 | 2.428 | 0.212 | 0.167 | 0.027 | 0.904 | n.a. | 6.996 |
| 15    | c                | 3.143                      | 0.059 | 2.511 | 0.234 | 0.124 | 0.034 | 0.908 | n.a. | 7.014 |
| 15    | r                | 3.192                      | 0.048 | 2.407 | 0.255 | 0.146 | 0.041 | 0.956 | n.a. | 7.053 |
| 16    | c                | 3.195                      | 0.048 | 2.409 | 0.257 | 0.156 | 0.038 | 0.930 | n.a. | 7.036 |
| 16    | r                | 3.192                      | 0.024 | 2.450 | 0.245 | 0.167 | 0.033 | 0.931 | n.a. | 7.041 |
| 17    | c                | 3.169                      | 0.030 | 2.488 | 0.251 | 0.137 | 0.042 | 0.905 | n.a. | 7.028 |
| 17    | r                | 3.216                      | 0.019 | 2.529 | 0.199 | 0.136 | 0.024 | 0.763 | n.a. | 6.893 |
| 18    | c                | 3.173                      | 0.040 | 2.471 | 0.234 | 0.127 | 0.045 | 0.951 | n.a. | 7.048 |
| 18    | r                | 3.197                      | 0.040 | 2.426 | 0.256 | 0.147 | 0.030 | 0.938 | n.a. | 7.034 |
| 19    | c                | 3.182                      | 0.046 | 2.418 | 0.275 | 0.152 | 0.040 | 0.928 | n.a. | 7.046 |
| 19    | r                | 3.166                      | 0.028 | 2.487 | 0.246 | 0.147 | 0.038 | 0.931 | n.a. | 7.047 |
| 20    | c                | 3.132                      | 0.070 | 2.471 | 0.253 | 0.142 | 0.046 | 0.928 | n.a. | 7.048 |
| 20    | r                | 3.164                      | 0.039 | 2.464 | 0.238 | 0.166 | 0.041 | 0.937 | n.a. | 7.054 |
| 21    | c                | 3.195                      | 0.042 | 2.416 | 0.238 | 0.179 | 0.045 | 0.924 | n.a. | 7.039 |
| 21    | r                | 3.183                      | 0.045 | 2.428 | 0.244 | 0.173 | 0.038 | 0.932 | n.a. | 7.043 |
| 22    | c                | 3.182                      | 0.051 | 2.434 | 0.256 | 0.137 | 0.043 | 0.931 | n.a. | 7.036 |
| 22    | r                | 3.194                      | 0.047 | 2.434 | 0.229 | 0.142 | 0.038 | 0.944 | n.a. | 7.032 |
| 23    | c                | 3.235                      | 0.051 | 2.331 | 0.245 | 0.187 | 0.044 | 0.945 | n.a. | 7.042 |
| 23    | r                | 3.196                      | 0.053 | 2.433 | 0.225 | 0.137 | 0.041 | 0.924 | n.a. | 7.014 |
| 24    | c                | 3.213                      | 0.045 | 2.387 | 0.237 | 0.173 | 0.053 | 0.922 | n.a. | 7.036 |
| 24    | r                | 3.186                      | 0.028 | 2.438 | 0.251 | 0.180 | 0.040 | 0.921 | n.a. | 7.047 |
| 25    | c                | 3.166                      | 0.046 | 2.463 | 0.219 | 0.168 | 0.048 | 0.926 | n.a. | 7.044 |
| 25    | r                | 3.178                      | 0.034 | 2.450 | 0.241 | 0.170 | 0.039 | 0.927 | n.a. | 7.044 |
| 26    | c                | 3.168                      | 0.055 | 2.481 | 0.209 | 0.154 | 0.039 | 0.899 | n.a. | 7.006 |
| 26    | r                | 3.184                      | 0.031 | 2.462 | 0.216 | 0.172 | 0.034 | 0.921 | n.a. | 7.030 |
| 27    | c                | 3.140                      | 0.059 | 2.464 | 0.253 | 0.138 | 0.057 | 0.952 | n.a. | 7.071 |
| 27    | r                | 3.153                      | 0.054 | 2.480 | 0.236 | 0.142 | 0.041 | 0.924 | n.a. | 7.035 |
| 28    | c                | 3.169                      | 0.062 | 2.419 | 0.259 | 0.159 | 0.039 | 0.938 | n.a. | 7.048 |
| 28    | r                | 3.173                      | 0.050 | 2.423 | 0.238 | 0.162 | 0.045 | 0.990 | n.a. | 7.082 |
| 29    | c                | 3.189                      | 0.054 | 2.425 | 0.242 | 0.154 | 0.045 | 0.912 | n.a. | 7.023 |
| 29    | r                | 3.203                      | 0.037 | 2.413 | 0.245 | 0.169 | 0.027 | 0.939 | n.a. | 7.036 |
| 30    | c                | 3.192                      | 0.050 | 2.420 | 0.225 | 0.169 | 0.049 | 0.922 | n.a. | 7.032 |
| 30    | r                | 3.168                      | 0.043 | 2.451 | 0.239 | 0.166 | 0.047 | 0.933 | n.a. | 7.054 |

Data represents the paramagnetic phengite fraction of sample 08008c.

<sup>1</sup> Core (c) or rim (r) of grains.

**Appendix C:** Phengite major element data (sample 08008c).

| Grain | c/r <sup>2</sup> | Oxide content (wt%) |                  |                                |      |      |                   |                  |      | Total |
|-------|------------------|---------------------|------------------|--------------------------------|------|------|-------------------|------------------|------|-------|
|       |                  | SiO <sub>2</sub>    | TiO <sub>2</sub> | Al <sub>2</sub> O <sub>3</sub> | FeO  | MgO  | Na <sub>2</sub> O | K <sub>2</sub> O | BaO  |       |
| 1     | c                | 48.61               | 1.10             | 29.81                          | 4.35 | 1.58 | 0.22              | 10.95            | 0.25 | 96.87 |
| 1     | r                | 48.98               | 0.78             | 29.33                          | 4.10 | 1.58 | 0.28              | 11.09            | 0.41 | 96.55 |
| 2     | c                | 48.34               | 0.87             | 29.00                          | 4.76 | 1.52 | 0.35              | 10.97            | 0.58 | 96.39 |
| 2     | r                | 48.32               | 0.86             | 29.19                          | 4.27 | 1.61 | 0.32              | 10.81            | 0.43 | 95.80 |
| 3     | c                | 48.01               | 1.23             | 30.18                          | 4.54 | 1.26 | 0.33              | 10.99            | 0.24 | 96.78 |
| 3     | r                | 48.39               | 1.13             | 28.95                          | 4.23 | 1.47 | 0.28              | 11.03            | <DL  | 95.48 |
| 4     | c                | 48.46               | 1.01             | 29.01                          | 4.42 | 1.58 | 0.23              | 10.80            | 0.26 | 95.78 |
| 4     | r                | 48.12               | 0.96             | 28.54                          | 4.46 | 1.58 | 0.31              | 10.97            | 0.28 | 95.21 |
| 5     | c                | 49.35               | 0.97             | 28.86                          | 4.31 | 2.01 | 0.37              | 11.14            | 0.24 | 97.25 |
| 5     | r                | 48.88               | 0.98             | 30.21                          | 3.86 | 1.71 | 0.35              | 10.49            | 0.91 | 97.39 |
| 6     | c                | 48.39               | 0.91             | 29.75                          | 3.96 | 1.40 | 0.26              | 11.05            | 0.23 | 95.95 |
| 6     | r                | 47.99               | 1.06             | 30.02                          | 4.26 | 1.33 | 0.35              | 10.98            | 0.26 | 96.25 |
| 7     | c                | 47.75               | 1.16             | 28.73                          | 4.51 | 1.60 | 0.38              | 11.00            | 0.32 | 95.44 |
| 7     | r                | 47.93               | 0.62             | 28.95                          | 3.82 | 1.64 | 0.26              | 10.82            | 0.39 | 94.44 |
| 8     | c                | 47.67               | 1.06             | 29.39                          | 4.66 | 1.30 | 0.28              | 10.96            | 0.41 | 95.74 |
| 8     | r                | 48.68               | 0.93             | 30.17                          | 4.62 | 1.18 | 0.43              | 11.13            | <DL  | 97.14 |
| 9     | c                | 47.97               | 1.11             | 29.35                          | 4.67 | 1.43 | 0.42              | 11.16            | <DL  | 96.10 |
| 9     | r                | 47.65               | 0.66             | 28.91                          | 4.26 | 1.56 | 0.33              | 10.79            | 0.26 | 94.41 |
| 10    | c                | 48.83               | 0.86             | 29.16                          | 4.76 | 1.68 | 0.36              | 10.96            | 0.48 | 97.08 |
| 10    | r                | 48.97               | 0.83             | 29.10                          | 4.74 | 1.78 | 0.31              | 11.33            | 0.47 | 97.53 |
| 11    | c                | 48.15               | 1.09             | 29.54                          | 4.87 | 1.35 | 0.34              | 11.06            | 0.49 | 96.89 |
| 11    | r                | 48.85               | 0.76             | 29.09                          | 4.51 | 1.60 | 0.24              | 10.99            | <DL  | 96.03 |
| 12    | c                | 47.31               | 1.24             | 29.48                          | 4.49 | 1.21 | 0.39              | 11.01            | <DL  | 95.13 |
| 12    | r                | 48.21               | 0.60             | 29.57                          | 4.16 | 1.30 | 0.34              | 11.21            | 0.42 | 95.81 |
| 13    | c                | 48.65               | 0.78             | 28.71                          | 5.14 | 1.86 | 0.26              | 11.16            | 0.20 | 96.75 |
| 13    | r                | 48.80               | 0.07             | 29.28                          | 4.51 | 2.51 | 0.27              | 11.29            | 0.22 | 96.95 |
| 14    | c                | 49.05               | 0.79             | 28.02                          | 4.56 | 1.70 | 0.27              | 10.92            | 0.65 | 95.96 |
| 14    | r                | 47.85               | 0.92             | 29.56                          | 4.11 | 1.31 | 0.42              | 10.95            | 0.59 | 95.71 |
| 15    | c                | 48.52               | 0.84             | 28.86                          | 4.63 | 1.59 | 0.29              | 10.92            | 0.47 | 96.12 |
| 15    | r                | 48.10               | 0.82             | 28.85                          | 4.17 | 1.54 | 0.38              | 10.70            | 0.28 | 94.84 |
| 16    | c                | 47.91               | 0.50             | 29.89                          | 3.88 | 1.66 | 0.36              | 11.03            | 0.49 | 95.73 |
| 16    | r                | 48.80               | 0.51             | 29.09                          | 3.83 | 1.83 | 0.25              | 10.20            | 0.57 | 95.08 |
| 17    | c                | 48.18               | 0.96             | 28.84                          | 4.10 | 1.65 | 0.34              | 11.03            | 0.44 | 95.53 |
| 17    | r                | 47.39               | 0.80             | 28.34                          | 4.00 | 1.65 | 0.35              | 10.96            | 0.34 | 93.84 |
| 18    | c                | 48.04               | 0.95             | 29.04                          | 4.14 | 1.87 | 0.27              | 10.94            | 0.45 | 95.70 |
| 18    | r                | 48.05               | 0.84             | 28.77                          | 3.82 | 1.84 | 0.29              | 11.20            | 0.18 | 94.99 |
| 19    | c                | 47.93               | 1.28             | 29.47                          | 4.48 | 1.17 | 0.34              | 11.04            | <DL  | 95.71 |
| 19    | r                | 48.22               | 0.88             | 28.70                          | 4.28 | 1.53 | 0.28              | 10.78            | 0.64 | 95.31 |
| 20    | c                | 48.99               | 1.18             | 27.52                          | 4.68 | 1.90 | 0.32              | 10.94            | 0.43 | 95.95 |
| 20    | r                | 48.51               | 0.68             | 29.41                          | 4.34 | 1.42 | 0.29              | 10.86            | 0.22 | 95.73 |
| 21    | c                | 49.23               | 0.92             | 28.96                          | 4.00 | 2.00 | 0.39              | 10.88            | 0.26 | 96.64 |
| 21    | r                | 48.65               | 0.90             | 28.95                          | 3.98 | 1.88 | 0.27              | 10.95            | 0.60 | 96.18 |
| 22    | c                | 47.89               | 1.09             | 29.03                          | 4.24 | 1.58 | 0.40              | 11.06            | 0.56 | 95.85 |
| 22    | r                | 48.31               | 0.91             | 27.99                          | 4.37 | 1.87 | 0.34              | 11.03            | 0.39 | 95.21 |
| 23    | c                | 47.72               | 1.25             | 29.22                          | 4.61 | 1.33 | 0.27              | 10.81            | 0.29 | 95.49 |
| 23    | r                | 48.27               | 0.93             | 28.65                          | 4.84 | 1.61 | 0.37              | 11.19            | 0.32 | 96.19 |
| 24    | c                | 48.25               | 0.96             | 28.95                          | 4.44 | 1.59 | 0.32              | 11.18            | 0.32 | 96.02 |
| 24    | r                | 48.78               | 0.81             | 29.55                          | 3.98 | 1.49 | 0.33              | 11.05            | 0.34 | 96.32 |
| 25    | c                | 46.78               | 1.02             | 28.03                          | 4.16 | 1.39 | 0.39              | 10.61            | 0.20 | 92.58 |
| 25    | r                | 48.42               | 0.82             | 29.19                          | 4.37 | 1.60 | 0.22              | 10.86            | 0.40 | 95.88 |
| 26    | c                | 48.03               | 1.12             | 30.23                          | 4.42 | 1.20 | 0.44              | 10.83            | 0.46 | 96.72 |
| 26    | r                | 47.98               | 1.09             | 29.22                          | 4.30 | 1.47 | 0.29              | 10.99            | 0.18 | 95.51 |
| 27    | c                | 48.79               | 1.13             | 29.47                          | 4.23 | 1.61 | 0.36              | 10.70            | 0.24 | 96.53 |
| 27    | r                | 48.81               | 0.79             | 28.95                          | 4.03 | 1.73 | 0.25              | 10.84            | 0.36 | 95.76 |
| 28    | c                | 47.84               | 1.16             | 28.79                          | 4.66 | 1.45 | 0.40              | 11.07            | 0.29 | 95.65 |
| 28    | r                | 48.93               | 0.97             | 28.48                          | 4.84 | 1.58 | 0.39              | 10.92            | 0.24 | 96.36 |
| 29    | c                | 47.32               | 1.21             | 29.55                          | 4.38 | 1.20 | 0.41              | 10.92            | 0.32 | 95.31 |
| 29    | r                | 46.61               | 1.09             | 29.00                          | 3.79 | 1.17 | 0.40              | 10.58            | 0.27 | 92.92 |
| 30    | c                | 48.29               | 0.96             | 29.39                          | 4.27 | 1.63 | 0.32              | 11.08            | 0.29 | 96.23 |
| 30    | r                | 48.52               | 0.91             | 29.05                          | 4.11 | 1.70 | 0.27              | 10.91            | 0.20 | 95.67 |

Abbreviations: <DL = below detection limits, n.a. = not analyzed. CaO and MnO mostly close to or below DL.

Data represents the less-paramagnetic phengite fraction of sample 08008c.

<sup>2</sup> Core (c) or rim (r) of grains.

**Appendix C:** Phengite major element data (sample 08008c).

| Grain | c/r <sup>1</sup> | Cation content (pfu; O=11) |       |       |       |       |       |       |       |       |
|-------|------------------|----------------------------|-------|-------|-------|-------|-------|-------|-------|-------|
|       |                  | Si                         | Ti    | Al    | Fe    | Mg    | Na    | K     | Ba    | Total |
| 1     | c                | 3.241                      | 0.055 | 2.343 | 0.243 | 0.157 | 0.028 | 0.932 | 0.007 | 7.012 |
| 1     | r                | 3.279                      | 0.039 | 2.314 | 0.230 | 0.157 | 0.036 | 0.947 | 0.011 | 7.016 |
| 2     | c                | 3.260                      | 0.044 | 2.305 | 0.268 | 0.153 | 0.046 | 0.944 | 0.015 | 7.038 |
| 2     | r                | 3.263                      | 0.043 | 2.323 | 0.241 | 0.162 | 0.042 | 0.931 | 0.011 | 7.018 |
| 3     | c                | 3.214                      | 0.062 | 2.381 | 0.254 | 0.126 | 0.042 | 0.939 | 0.006 | 7.024 |
| 3     | r                | 3.271                      | 0.058 | 2.307 | 0.239 | 0.148 | 0.036 | 0.951 | 0.000 | 7.012 |
| 4     | c                | 3.268                      | 0.051 | 2.306 | 0.249 | 0.159 | 0.030 | 0.929 | 0.007 | 7.006 |
| 4     | r                | 3.275                      | 0.049 | 2.289 | 0.254 | 0.160 | 0.041 | 0.952 | 0.008 | 7.028 |
| 5     | c                | 3.283                      | 0.048 | 2.262 | 0.240 | 0.199 | 0.047 | 0.945 | 0.006 | 7.034 |
| 5     | r                | 3.242                      | 0.049 | 2.362 | 0.214 | 0.169 | 0.045 | 0.888 | 0.024 | 6.994 |
| 6     | c                | 3.255                      | 0.046 | 2.358 | 0.223 | 0.140 | 0.034 | 0.948 | 0.006 | 7.012 |
| 6     | r                | 3.225                      | 0.053 | 2.378 | 0.239 | 0.133 | 0.046 | 0.941 | 0.007 | 7.025 |
| 7     | c                | 3.246                      | 0.059 | 2.302 | 0.256 | 0.162 | 0.049 | 0.954 | 0.008 | 7.044 |
| 7     | r                | 3.273                      | 0.032 | 2.330 | 0.218 | 0.167 | 0.035 | 0.943 | 0.011 | 7.017 |
| 8     | c                | 3.233                      | 0.054 | 2.349 | 0.264 | 0.132 | 0.037 | 0.948 | 0.011 | 7.031 |
| 8     | r                | 3.240                      | 0.047 | 2.367 | 0.257 | 0.117 | 0.055 | 0.945 | 0.001 | 7.030 |
| 9     | c                | 3.235                      | 0.056 | 2.333 | 0.263 | 0.143 | 0.054 | 0.960 | 0.000 | 7.050 |
| 9     | r                | 3.262                      | 0.034 | 2.332 | 0.244 | 0.159 | 0.043 | 0.942 | 0.007 | 7.030 |
| 10    | c                | 3.264                      | 0.043 | 2.298 | 0.266 | 0.167 | 0.046 | 0.935 | 0.012 | 7.034 |
| 10    | r                | 3.264                      | 0.041 | 2.286 | 0.264 | 0.177 | 0.040 | 0.963 | 0.012 | 7.052 |
| 11    | c                | 3.233                      | 0.055 | 2.337 | 0.273 | 0.135 | 0.044 | 0.947 | 0.013 | 7.039 |
| 11    | r                | 3.282                      | 0.038 | 2.303 | 0.253 | 0.160 | 0.031 | 0.942 | 0.002 | 7.014 |
| 12    | c                | 3.219                      | 0.064 | 2.364 | 0.256 | 0.123 | 0.051 | 0.956 | 0.002 | 7.037 |
| 12    | r                | 3.259                      | 0.030 | 2.356 | 0.235 | 0.131 | 0.044 | 0.967 | 0.011 | 7.038 |
| 13    | c                | 3.268                      | 0.039 | 2.273 | 0.289 | 0.186 | 0.033 | 0.956 | 0.005 | 7.052 |
| 13    | r                | 3.261                      | 0.004 | 2.306 | 0.252 | 0.250 | 0.035 | 0.962 | 0.006 | 7.081 |
| 14    | c                | 3.316                      | 0.040 | 2.232 | 0.258 | 0.171 | 0.035 | 0.942 | 0.017 | 7.016 |
| 14    | r                | 3.242                      | 0.047 | 2.360 | 0.233 | 0.133 | 0.055 | 0.946 | 0.016 | 7.031 |
| 15    | c                | 3.274                      | 0.042 | 2.295 | 0.261 | 0.160 | 0.038 | 0.940 | 0.012 | 7.025 |
| 15    | r                | 3.275                      | 0.042 | 2.315 | 0.237 | 0.156 | 0.050 | 0.929 | 0.008 | 7.015 |
| 16    | c                | 3.237                      | 0.025 | 2.380 | 0.219 | 0.167 | 0.048 | 0.951 | 0.013 | 7.047 |
| 16    | r                | 3.299                      | 0.026 | 2.318 | 0.217 | 0.184 | 0.032 | 0.880 | 0.015 | 6.972 |
| 17    | c                | 3.267                      | 0.049 | 2.305 | 0.233 | 0.167 | 0.045 | 0.954 | 0.012 | 7.031 |
| 17    | r                | 3.268                      | 0.041 | 2.303 | 0.231 | 0.170 | 0.047 | 0.964 | 0.009 | 7.044 |
| 18    | c                | 3.251                      | 0.048 | 2.316 | 0.234 | 0.189 | 0.036 | 0.944 | 0.012 | 7.032 |
| 18    | r                | 3.268                      | 0.043 | 2.306 | 0.217 | 0.187 | 0.038 | 0.972 | 0.005 | 7.039 |
| 19    | c                | 3.237                      | 0.065 | 2.345 | 0.253 | 0.117 | 0.045 | 0.951 | 0.003 | 7.021 |
| 19    | r                | 3.279                      | 0.045 | 2.300 | 0.243 | 0.155 | 0.036 | 0.935 | 0.017 | 7.012 |
| 20    | c                | 3.312                      | 0.060 | 2.193 | 0.265 | 0.191 | 0.041 | 0.943 | 0.011 | 7.023 |
| 20    | r                | 3.270                      | 0.034 | 2.336 | 0.245 | 0.143 | 0.038 | 0.934 | 0.006 | 7.013 |
| 21    | c                | 3.285                      | 0.046 | 2.278 | 0.223 | 0.199 | 0.050 | 0.926 | 0.007 | 7.018 |
| 21    | r                | 3.274                      | 0.046 | 2.296 | 0.224 | 0.189 | 0.035 | 0.940 | 0.016 | 7.020 |
| 22    | c                | 3.245                      | 0.055 | 2.318 | 0.240 | 0.160 | 0.052 | 0.956 | 0.015 | 7.044 |
| 22    | r                | 3.291                      | 0.047 | 2.247 | 0.249 | 0.190 | 0.045 | 0.959 | 0.011 | 7.040 |
| 23    | c                | 3.237                      | 0.064 | 2.336 | 0.262 | 0.134 | 0.035 | 0.935 | 0.008 | 7.017 |
| 23    | r                | 3.261                      | 0.047 | 2.281 | 0.273 | 0.162 | 0.049 | 0.964 | 0.009 | 7.057 |
| 24    | c                | 3.260                      | 0.049 | 2.305 | 0.251 | 0.160 | 0.042 | 0.964 | 0.009 | 7.042 |
| 24    | r                | 3.269                      | 0.041 | 2.334 | 0.223 | 0.149 | 0.043 | 0.945 | 0.009 | 7.016 |
| 25    | c                | 3.268                      | 0.054 | 2.308 | 0.243 | 0.144 | 0.053 | 0.946 | 0.006 | 7.023 |
| 25    | r                | 3.266                      | 0.042 | 2.320 | 0.247 | 0.161 | 0.028 | 0.934 | 0.011 | 7.012 |
| 26    | c                | 3.215                      | 0.056 | 2.385 | 0.247 | 0.120 | 0.057 | 0.925 | 0.012 | 7.026 |
| 26    | r                | 3.249                      | 0.055 | 2.332 | 0.244 | 0.148 | 0.038 | 0.949 | 0.005 | 7.022 |
| 27    | c                | 3.259                      | 0.057 | 2.320 | 0.236 | 0.160 | 0.047 | 0.912 | 0.006 | 7.002 |
| 27    | r                | 3.287                      | 0.040 | 2.298 | 0.227 | 0.174 | 0.033 | 0.931 | 0.009 | 7.005 |
| 28    | c                | 3.248                      | 0.059 | 2.303 | 0.265 | 0.147 | 0.052 | 0.959 | 0.008 | 7.045 |
| 28    | r                | 3.291                      | 0.049 | 2.258 | 0.272 | 0.159 | 0.051 | 0.937 | 0.006 | 7.025 |
| 29    | c                | 3.218                      | 0.062 | 2.368 | 0.249 | 0.122 | 0.054 | 0.947 | 0.009 | 7.035 |
| 29    | r                | 3.236                      | 0.057 | 2.373 | 0.220 | 0.121 | 0.054 | 0.937 | 0.007 | 7.016 |
| 30    | c                | 3.249                      | 0.049 | 2.330 | 0.240 | 0.164 | 0.041 | 0.951 | 0.008 | 7.033 |
| 30    | r                | 3.274                      | 0.046 | 2.310 | 0.232 | 0.171 | 0.035 | 0.939 | 0.005 | 7.012 |

Data represents the less-paramagnetic phengite fraction of sample 08008c.

<sup>1</sup> Core (c) or rim (r) of grains.

**Appendix C:** Phengite major element data (sample 08017).

| Grain | c/r <sup>1</sup> | Oxide content (wt%) |                  | Al <sub>2</sub> O <sub>3</sub> | FeO  | MgO  | Na <sub>2</sub> O | K <sub>2</sub> O | BaO  | Total |
|-------|------------------|---------------------|------------------|--------------------------------|------|------|-------------------|------------------|------|-------|
|       |                  | SiO <sub>2</sub>    | TiO <sub>2</sub> |                                |      |      |                   |                  |      |       |
| 1     | c                | 46.13               | 0.54             | 35.97                          | 2.24 | 0.89 | 1.71              | 8.66             | n.a. | 96.14 |
| 1     | r                | 46.05               | 0.49             | 35.50                          | 2.18 | 0.83 | 1.56              | 8.69             | n.a. | 95.30 |
| 2     | c                | 46.55               | 0.52             | 35.98                          | 2.49 | 1.02 | 1.53              | 8.88             | n.a. | 96.97 |
| 2     | r                | 46.67               | 0.55             | 35.75                          | 2.28 | 1.06 | 1.47              | 8.98             | n.a. | 96.77 |
| 3     | c                | 45.83               | 0.45             | 34.48                          | 2.44 | 1.03 | 1.62              | 8.95             | n.a. | 94.80 |
| 3     | r                | 46.12               | 0.44             | 34.99                          | 2.25 | 1.02 | 1.59              | 8.98             | n.a. | 95.40 |
| 4     | c                | 46.64               | 0.54             | 34.55                          | 2.43 | 1.12 | 1.51              | 9.06             | n.a. | 95.85 |
| 4     | r                | 46.34               | 0.56             | 35.01                          | 2.39 | 1.05 | 1.45              | 9.10             | n.a. | 95.90 |
| 5     | c                | 47.40               | 0.65             | 34.08                          | 2.37 | 1.03 | 1.42              | 9.03             | n.a. | 95.98 |
| 5     | r                | 46.04               | 0.68             | 34.45                          | 2.24 | 1.04 | 1.53              | 9.01             | n.a. | 94.99 |
| 6     | c                | 46.40               | 0.57             | 35.31                          | 2.27 | 0.97 | 1.44              | 8.89             | n.a. | 95.85 |
| 6     | r                | 46.80               | 0.52             | 35.08                          | 2.25 | 1.13 | 1.53              | 9.11             | n.a. | 96.42 |
| 7     | c                | 45.95               | 0.49             | 34.99                          | 2.42 | 0.87 | 1.64              | 8.79             | n.a. | 95.15 |
| 7     | r                | 45.91               | 0.43             | 35.09                          | 2.04 | 0.77 | 1.57              | 8.82             | n.a. | 94.63 |
| 8     | c                | 46.38               | 0.69             | 34.61                          | 2.34 | 1.08 | 1.46              | 9.31             | n.a. | 95.87 |
| 8     | r                | 46.45               | 0.55             | 34.73                          | 2.17 | 1.08 | 1.46              | 8.75             | n.a. | 95.18 |
| 9     | c                | 47.03               | 0.68             | 34.99                          | 2.29 | 1.05 | 1.45              | 8.94             | n.a. | 96.43 |
| 9     | r                | 46.77               | 0.61             | 34.85                          | 2.29 | 1.15 | 1.51              | 8.92             | n.a. | 96.10 |
| 10    | c                | 46.37               | 0.49             | 35.54                          | 2.24 | 1.02 | 1.38              | 9.06             | n.a. | 96.10 |
| 10    | r                | 46.14               | 0.46             | 34.31                          | 2.29 | 1.13 | 1.55              | 8.92             | n.a. | 94.80 |
| 11    | c                | 46.63               | 0.55             | 35.42                          | 2.18 | 0.83 | 1.83              | 8.78             | n.a. | 96.22 |
| 11    | r                | 46.89               | 0.68             | 34.31                          | 2.12 | 1.12 | 1.43              | 9.24             | n.a. | 95.79 |
| 12    | c                | 46.44               | 0.45             | 35.11                          | 2.66 | 0.99 | 1.56              | 8.97             | n.a. | 96.18 |
| 12    | r                | 46.85               | 0.59             | 35.4                           | 2.39 | 1.05 | 1.52              | 8.79             | n.a. | 96.59 |
| 13    | c                | 46.41               | 0.54             | 35.52                          | 2.34 | 0.86 | 1.72              | 8.82             | n.a. | 96.20 |
| 13    | r                | 46.71               | 0.48             | 36.12                          | 2.39 | 0.81 | 1.70              | 8.78             | n.a. | 96.98 |
| 14    | c                | 46.45               | 0.60             | 33.96                          | 2.22 | 1.20 | 1.47              | 8.93             | n.a. | 94.82 |
| 14    | r                | 46.67               | 0.61             | 34.47                          | 2.35 | 1.05 | 1.74              | 8.72             | n.a. | 95.61 |
| 15    | c                | 46.74               | 0.59             | 35.02                          | 2.47 | 1.07 | 1.48              | 8.89             | n.a. | 96.26 |
| 15    | r                | 47.72               | 0.50             | 35.73                          | 2.44 | 1.02 | 1.50              | 8.92             | n.a. | 97.82 |
| 16    | c                | 46.84               | 0.51             | 34.66                          | 2.40 | 1.23 | 1.52              | 9.07             | n.a. | 96.23 |
| 16    | r                | 46.61               | 0.37             | 34.34                          | 2.26 | 1.08 | 1.47              | 9.30             | n.a. | 95.43 |
| 17    | c                | 46.34               | 0.66             | 34.91                          | 2.27 | 0.89 | 1.52              | 8.99             | n.a. | 95.57 |
| 17    | r                | 47.54               | 0.55             | 35.32                          | 2.02 | 0.96 | 1.32              | 8.78             | n.a. | 96.49 |
| 18    | c                | 46.52               | 0.49             | 35.93                          | 2.31 | 0.86 | 1.80              | 8.68             | n.a. | 96.59 |
| 18    | r                | 46.69               | 0.54             | 35.28                          | 2.13 | 0.94 | 1.46              | 8.86             | n.a. | 95.90 |
| 19    | c                | 45.80               | 0.53             | 35.09                          | 2.56 | 0.84 | 1.56              | 9.10             | n.a. | 95.48 |
| 19    | r                | 46.86               | 0.51             | 35.21                          | 2.14 | 0.91 | 1.63              | 8.55             | n.a. | 95.80 |
| 20    | c                | 46.57               | 0.48             | 35.94                          | 2.11 | 0.82 | 1.62              | 9.00             | n.a. | 96.54 |
| 20    | r                | 46.42               | 0.72             | 35.89                          | 2.08 | 0.77 | 1.79              | 8.47             | n.a. | 96.13 |
| 21    | c                | 47.36               | 0.69             | 35.16                          | 2.44 | 1.10 | 1.37              | 9.21             | n.a. | 97.33 |
| 21    | r                | 46.19               | 0.46             | 35.50                          | 2.16 | 0.91 | 1.70              | 8.72             | n.a. | 95.64 |
| 22    | c                | 46.74               | 0.40             | 34.82                          | 2.14 | 0.98 | 1.54              | 8.80             | n.a. | 95.42 |
| 22    | r                | 46.00               | 0.50             | 35.63                          | 2.17 | 0.77 | 1.70              | 8.38             | n.a. | 95.15 |
| 23    | c                | 45.82               | 0.55             | 34.14                          | 2.36 | 1.07 | 1.54              | 9.06             | n.a. | 94.54 |
| 23    | r                | 46.72               | 0.53             | 35.00                          | 2.39 | 0.94 | 1.61              | 8.84             | n.a. | 96.02 |
| 24    | c                | 46.88               | 0.43             | 35.20                          | 2.18 | 0.90 | 1.49              | 8.71             | n.a. | 95.79 |
| 24    | r                | 46.57               | 0.36             | 35.83                          | 2.17 | 0.95 | 1.51              | 8.77             | n.a. | 96.16 |
| 25    | c                | 46.25               | 0.59             | 34.69                          | 2.22 | 0.95 | 1.68              | 8.99             | n.a. | 95.36 |
| 25    | r                | 46.82               | 0.52             | 35.42                          | 2.18 | 1.09 | 1.57              | 8.93             | n.a. | 96.53 |
| 26    | c                | 46.28               | 0.57             | 35.58                          | 2.13 | 0.85 | 1.65              | 8.70             | n.a. | 95.75 |
| 26    | r                | 47.16               | 0.62             | 34.98                          | 2.22 | 1.02 | 1.59              | 9.12             | n.a. | 96.71 |
| 27    | c                | 46.33               | 0.73             | 35.07                          | 2.19 | 0.96 | 1.60              | 8.76             | n.a. | 95.64 |
| 27    | r                | 46.88               | 0.80             | 34.41                          | 2.30 | 1.10 | 1.43              | 8.78             | n.a. | 95.70 |
| 28    | c                | 46.99               | 0.54             | 34.06                          | 2.56 | 1.09 | 1.49              | 8.72             | n.a. | 95.45 |
| 28    | r                | 46.16               | 0.53             | 33.98                          | 2.23 | 1.07 | 1.55              | 8.99             | n.a. | 94.51 |
| 29    | c                | 47.48               | 0.53             | 34.47                          | 2.33 | 1.15 | 1.49              | 8.92             | n.a. | 96.37 |
| 29    | r                | 46.86               | 0.59             | 34.41                          | 2.32 | 1.14 | 1.52              | 8.93             | n.a. | 95.77 |
| 30    | c                | 46.93               | 0.65             | 35.35                          | 2.42 | 0.92 | 1.59              | 8.90             | n.a. | 96.75 |
| 30    | r                | 46.73               | 0.50             | 35.25                          | 2.47 | 0.84 | 1.63              | 8.82             | n.a. | 96.24 |

Abbreviations: &lt;DL = below detection limits, n.a. = not analyzed. CaO and MnO mostly close to or below DL.

<sup>1</sup> Core (c) or rim (r) of grains.

Appendix C: Phengite major element data (sample 08017).

| Grain | c/r <sup>1</sup> | Cation content (pfu; O=11) |       |       |       |       |       |       |      | Total |
|-------|------------------|----------------------------|-------|-------|-------|-------|-------|-------|------|-------|
|       |                  | Si                         | Ti    | Al    | Fe    | Mg    | Na    | K     | Ba   |       |
| 1     | c                | 3.035                      | 0.027 | 2.789 | 0.123 | 0.087 | 0.218 | 0.727 |      | 7.015 |
| 1     | r                | 3.055                      | 0.024 | 2.776 | 0.121 | 0.082 | 0.201 | 0.736 | n.a. | 6.999 |
| 2     | c                | 3.041                      | 0.025 | 2.770 | 0.136 | 0.099 | 0.194 | 0.740 | n.a. | 7.013 |
| 2     | r                | 3.052                      | 0.027 | 2.756 | 0.125 | 0.104 | 0.186 | 0.749 | n.a. | 7.008 |
| 3     | c                | 3.069                      | 0.023 | 2.721 | 0.137 | 0.103 | 0.210 | 0.765 | n.a. | 7.033 |
| 3     | r                | 3.065                      | 0.022 | 2.740 | 0.125 | 0.101 | 0.205 | 0.761 | n.a. | 7.024 |
| 4     | c                | 3.085                      | 0.027 | 2.694 | 0.134 | 0.110 | 0.194 | 0.765 | n.a. | 7.017 |
| 4     | r                | 3.067                      | 0.028 | 2.731 | 0.132 | 0.104 | 0.186 | 0.768 | n.a. | 7.017 |
| 5     | c                | 3.125                      | 0.032 | 2.648 | 0.131 | 0.102 | 0.182 | 0.759 | n.a. | 6.987 |
| 5     | r                | 3.072                      | 0.034 | 2.710 | 0.125 | 0.104 | 0.198 | 0.767 | n.a. | 7.019 |
| 6     | c                | 3.065                      | 0.028 | 2.749 | 0.125 | 0.096 | 0.184 | 0.749 | n.a. | 6.999 |
| 6     | r                | 3.075                      | 0.026 | 2.717 | 0.124 | 0.110 | 0.195 | 0.764 | n.a. | 7.017 |
| 7     | c                | 3.061                      | 0.025 | 2.747 | 0.135 | 0.087 | 0.212 | 0.747 | n.a. | 7.019 |
| 7     | r                | 3.067                      | 0.022 | 2.762 | 0.114 | 0.076 | 0.203 | 0.752 | n.a. | 7.005 |
| 8     | c                | 3.073                      | 0.034 | 2.703 | 0.130 | 0.107 | 0.188 | 0.787 | n.a. | 7.027 |
| 8     | r                | 3.086                      | 0.027 | 2.719 | 0.121 | 0.107 | 0.188 | 0.742 | n.a. | 6.992 |
| 9     | c                | 3.086                      | 0.034 | 2.706 | 0.126 | 0.103 | 0.184 | 0.748 | n.a. | 6.991 |
| 9     | r                | 3.083                      | 0.030 | 2.708 | 0.126 | 0.113 | 0.193 | 0.750 | n.a. | 7.004 |
| 10    | c                | 3.057                      | 0.024 | 2.761 | 0.123 | 0.100 | 0.176 | 0.762 | n.a. | 7.006 |
| 10    | r                | 3.086                      | 0.023 | 2.704 | 0.128 | 0.113 | 0.201 | 0.761 | n.a. | 7.020 |
| 11    | c                | 3.067                      | 0.027 | 2.746 | 0.120 | 0.081 | 0.233 | 0.737 | n.a. | 7.016 |
| 11    | r                | 3.103                      | 0.034 | 2.676 | 0.117 | 0.111 | 0.183 | 0.780 | n.a. | 7.007 |
| 12    | c                | 3.066                      | 0.023 | 2.732 | 0.147 | 0.097 | 0.200 | 0.756 | n.a. | 7.022 |
| 12    | r                | 3.070                      | 0.029 | 2.734 | 0.131 | 0.103 | 0.193 | 0.735 | n.a. | 6.997 |
| 13    | c                | 3.058                      | 0.027 | 2.758 | 0.129 | 0.084 | 0.220 | 0.741 | n.a. | 7.017 |
| 13    | r                | 3.050                      | 0.023 | 2.780 | 0.131 | 0.078 | 0.215 | 0.731 | n.a. | 7.010 |
| 14    | c                | 3.103                      | 0.030 | 2.673 | 0.124 | 0.119 | 0.190 | 0.761 | n.a. | 7.004 |
| 14    | r                | 3.092                      | 0.030 | 2.692 | 0.130 | 0.104 | 0.224 | 0.737 | n.a. | 7.011 |
| 15    | c                | 3.077                      | 0.029 | 2.717 | 0.136 | 0.105 | 0.189 | 0.747 | n.a. | 7.002 |
| 15    | r                | 3.086                      | 0.024 | 2.723 | 0.132 | 0.098 | 0.188 | 0.736 | n.a. | 6.989 |
| 16    | c                | 3.088                      | 0.025 | 2.693 | 0.132 | 0.121 | 0.194 | 0.763 | n.a. | 7.019 |
| 16    | r                | 3.100                      | 0.019 | 2.692 | 0.126 | 0.107 | 0.190 | 0.789 | n.a. | 7.024 |
| 17    | c                | 3.072                      | 0.033 | 2.728 | 0.126 | 0.088 | 0.195 | 0.760 | n.a. | 7.007 |
| 17    | r                | 3.105                      | 0.027 | 2.718 | 0.110 | 0.094 | 0.168 | 0.731 | n.a. | 6.958 |
| 18    | c                | 3.049                      | 0.024 | 2.775 | 0.127 | 0.084 | 0.229 | 0.726 | n.a. | 7.016 |
| 18    | r                | 3.078                      | 0.027 | 2.742 | 0.117 | 0.092 | 0.187 | 0.745 | n.a. | 6.990 |
| 19    | c                | 3.050                      | 0.026 | 2.754 | 0.143 | 0.083 | 0.201 | 0.773 | n.a. | 7.033 |
| 19    | r                | 3.088                      | 0.025 | 2.734 | 0.118 | 0.089 | 0.208 | 0.719 | n.a. | 6.984 |
| 20    | c                | 3.052                      | 0.023 | 2.776 | 0.116 | 0.080 | 0.206 | 0.752 | n.a. | 7.013 |
| 20    | r                | 3.050                      | 0.035 | 2.779 | 0.114 | 0.075 | 0.228 | 0.710 | n.a. | 6.994 |
| 21    | c                | 3.084                      | 0.034 | 2.698 | 0.133 | 0.107 | 0.173 | 0.765 | n.a. | 6.999 |
| 21    | r                | 3.055                      | 0.023 | 2.767 | 0.119 | 0.090 | 0.218 | 0.736 | n.a. | 7.014 |
| 22    | c                | 3.097                      | 0.020 | 2.719 | 0.119 | 0.096 | 0.198 | 0.744 | n.a. | 6.994 |
| 22    | r                | 3.052                      | 0.025 | 2.786 | 0.120 | 0.076 | 0.219 | 0.709 | n.a. | 6.992 |
| 23    | c                | 3.078                      | 0.028 | 2.703 | 0.133 | 0.107 | 0.201 | 0.776 | n.a. | 7.031 |
| 23    | r                | 3.081                      | 0.026 | 2.720 | 0.132 | 0.092 | 0.206 | 0.744 | n.a. | 7.006 |
| 24    | c                | 3.090                      | 0.021 | 2.734 | 0.120 | 0.089 | 0.190 | 0.732 | n.a. | 6.982 |
| 24    | r                | 3.061                      | 0.018 | 2.776 | 0.119 | 0.093 | 0.192 | 0.735 | n.a. | 6.998 |
| 25    | c                | 3.075                      | 0.029 | 2.718 | 0.123 | 0.094 | 0.217 | 0.762 | n.a. | 7.024 |
| 25    | r                | 3.069                      | 0.025 | 2.736 | 0.120 | 0.107 | 0.200 | 0.747 | n.a. | 7.009 |
| 26    | c                | 3.056                      | 0.028 | 2.769 | 0.118 | 0.083 | 0.211 | 0.733 | n.a. | 7.002 |
| 26    | r                | 3.090                      | 0.030 | 2.701 | 0.122 | 0.099 | 0.202 | 0.762 | n.a. | 7.010 |
| 27    | c                | 3.065                      | 0.036 | 2.734 | 0.121 | 0.095 | 0.205 | 0.739 | n.a. | 7.001 |
| 27    | r                | 3.098                      | 0.040 | 2.680 | 0.127 | 0.108 | 0.183 | 0.740 | n.a. | 6.982 |
| 28    | c                | 3.118                      | 0.027 | 2.663 | 0.142 | 0.107 | 0.192 | 0.738 | n.a. | 6.989 |
| 28    | r                | 3.097                      | 0.027 | 2.687 | 0.125 | 0.107 | 0.202 | 0.770 | n.a. | 7.018 |
| 29    | c                | 3.116                      | 0.026 | 2.666 | 0.128 | 0.113 | 0.190 | 0.747 | n.a. | 6.991 |
| 29    | r                | 3.099                      | 0.029 | 2.682 | 0.128 | 0.112 | 0.195 | 0.753 | n.a. | 7.003 |
| 30    | c                | 3.074                      | 0.032 | 2.729 | 0.133 | 0.089 | 0.202 | 0.744 | n.a. | 7.003 |
| 30    | r                | 3.076                      | 0.025 | 2.735 | 0.136 | 0.083 | 0.208 | 0.741 | n.a. | 7.006 |

<sup>1</sup> Core (c) or rim (r) of grains.



**Appendix C:** Phengite major element data (sample 09015).

| Grain | c/r <sup>1</sup> | Oxide content (wt%) |                  | Al <sub>2</sub> O <sub>3</sub> | FeO  | MgO  | Na <sub>2</sub> O | K <sub>2</sub> O | BaO  | Total |
|-------|------------------|---------------------|------------------|--------------------------------|------|------|-------------------|------------------|------|-------|
|       |                  | SiO <sub>2</sub>    | TiO <sub>2</sub> |                                |      |      |                   |                  |      |       |
| 1     | c                | 49.61               | 0.27             | 30.54                          | 2.24 | 1.52 | 0.76              | 10.01            | 0.35 | 95.29 |
| 1     | r                | 48.59               | 0.34             | 31.33                          | 2.38 | 1.51 | 0.90              | 9.94             | 0.40 | 95.39 |
| 2     | c                | 48.99               | 0.31             | 31.04                          | 2.59 | 1.37 | 0.98              | 9.78             | <DL  | 95.06 |
| 2     | r                | 49.17               | 0.22             | 30.83                          | 2.11 | 1.81 | 1.08              | 9.64             | 0.48 | 95.34 |
| 3     | c                | 49.95               | 0.27             | 30.85                          | 2.03 | 1.75 | 1.00              | 9.71             | <DL  | 95.56 |
| 3     | r                | 48.88               | 0.35             | 30.45                          | 2.08 | 1.70 | 1.04              | 10.08            | 0.30 | 94.88 |
| 4     | c                | 49.69               | 0.28             | 30.84                          | 2.20 | 1.69 | 1.08              | 9.74             | 0.30 | 95.82 |
| 4     | r                | 47.24               | 0.14             | 37.73                          | 0.41 | 0.08 | 7.47              | 0.67             | 0.20 | 93.93 |
| 5     | c                | 49.46               | 0.27             | 30.13                          | 1.94 | 1.66 | 1.05              | 9.86             | 0.19 | 94.57 |
| 5     | r                | 48.34               | 0.29             | 30.85                          | 1.93 | 1.84 | 1.16              | 9.69             | 0.40 | 94.51 |
| 6     | c                | 51.44               | 0.20             | 26.80                          | 2.82 | 2.76 | 0.49              | 10.30            | 0.46 | 95.27 |
| 6     | r                | 49.29               | 0.23             | 29.84                          | 2.18 | 1.76 | 1.18              | 9.51             | 0.40 | 94.40 |
| 7     | c                | 50.00               | 0.28             | 30.64                          | 2.29 | 1.80 | 0.86              | 9.92             | 0.17 | 95.96 |
| 7     | r                | 49.38               | 0.33             | 30.28                          | 2.23 | 1.56 | 0.90              | 9.84             | 0.44 | 94.95 |
| 8     | c                | 49.37               | 0.17             | 30.72                          | 2.13 | 1.71 | 0.82              | 10.27            | 0.18 | 95.37 |
| 8     | r                | 48.58               | 0.34             | 30.98                          | 2.15 | 1.50 | 0.92              | 9.47             | 0.25 | 94.20 |
| 9     | c                | 49.83               | 0.33             | 32.01                          | 1.90 | 1.64 | 1.06              | 9.82             | 0.26 | 96.84 |
| 9     | r                | 50.21               | 0.23             | 31.38                          | 1.99 | 1.88 | 0.99              | 9.66             | 0.32 | 96.66 |
| 10    | c                | 49.71               | 0.24             | 31.62                          | 2.45 | 1.54 | 0.95              | 9.84             | 0.15 | 96.50 |
| 10    | r                | 47.84               | 0.07             | 38.18                          | 0.46 | 0.12 | 7.12              | 1.56             | 0.23 | 95.57 |
| 11    | c                | 50.04               | 0.29             | 30.67                          | 2.26 | 1.75 | 0.80              | 9.68             | 0.44 | 95.93 |
| 11    | r                | 49.64               | 0.35             | 30.83                          | 2.01 | 1.93 | 1.02              | 9.75             | 0.21 | 95.75 |
| 12    | c                | 49.23               | 0.32             | 31.48                          | 1.88 | 1.51 | 1.20              | 9.84             | 0.42 | 95.88 |
| 12    | r                | 47.71               | 0.08             | 37.97                          | 0.39 | 0.06 | 7.07              | 1.17             | 0.36 | 94.82 |
| 13    | c                | 52.50               | 0.23             | 26.46                          | 2.34 | 2.97 | 0.59              | 9.89             | 0.35 | 95.32 |
| 13    | r                | 47.85               | 0.35             | 30.80                          | 1.93 | 1.43 | 1.52              | 9.21             | 0.39 | 93.49 |
| 14    | c                | 49.36               | 0.32             | 30.33                          | 2.16 | 1.86 | 0.93              | 9.84             | 0.46 | 95.26 |
| 14    | r                | 49.43               | 0.29             | 30.16                          | 2.17 | 1.90 | 0.82              | 9.96             | 0.32 | 95.05 |
| 15    | c                | 51.30               | 0.24             | 26.22                          | 2.78 | 2.67 | 0.35              | 10.25            | 0.27 | 94.08 |
| 15    | r                | 52.55               | 0.32             | 27.53                          | 2.22 | 3.00 | 0.53              | 10.01            | 0.32 | 96.47 |
| 16    | c                | 49.40               | 0.16             | 31.12                          | 2.24 | 1.58 | 0.84              | 10.13            | 0.24 | 95.71 |
| 16    | r                | 48.77               | 0.35             | 30.27                          | 2.29 | 1.67 | 0.88              | 9.94             | 0.31 | 94.47 |
| 17    | c                | 49.29               | 0.34             | 31.85                          | 2.28 | 1.43 | 0.83              | 10.03            | 0.38 | 96.42 |
| 17    | r                | 49.58               | 0.32             | 31.43                          | 2.31 | 1.82 | 1.08              | 9.61             | 0.75 | 96.90 |
| 18    | c                | 49.61               | 0.27             | 31.62                          | 2.31 | 1.74 | 0.94              | 9.91             | 0.41 | 96.82 |
| 18    | r                | 48.50               | 0.35             | 29.86                          | 2.25 | 1.77 | 0.92              | 9.56             | 0.20 | 93.40 |
| 19    | c                | 49.32               | 0.32             | 30.10                          | 2.43 | 1.86 | 0.96              | 9.98             | <DL  | 94.97 |
| 19    | r                | 47.04               | 0.13             | 37.60                          | 0.52 | 0.11 | 7.37              | 1.12             | <DL  | 93.88 |
| 20    | c                | 49.07               | 0.29             | 29.76                          | 2.16 | 1.97 | 0.92              | 9.88             | 0.46 | 94.51 |
| 20    | r                | 48.03               | 0.32             | 31.07                          | 1.81 | 1.54 | 1.20              | 9.52             | 0.44 | 93.93 |
| 21    | c                | 49.70               | 0.18             | 31.08                          | 2.11 | 1.88 | 1.08              | 9.99             | 0.66 | 96.68 |
| 21    | r                | 48.88               | 0.24             | 31.21                          | 2.29 | 1.66 | 0.92              | 10.22            | 0.37 | 95.78 |
| 22    | c                | 48.84               | 0.34             | 30.27                          | 2.30 | 1.51 | 0.79              | 10.12            | <DL  | 94.17 |
| 22    | r                | 48.89               | 0.34             | 30.39                          | 1.93 | 1.65 | 1.07              | 9.62             | 0.38 | 94.28 |
| 23    | c                | 49.19               | 0.29             | 31.96                          | 1.99 | 1.51 | 1.18              | 9.77             | 0.24 | 96.12 |
| 23    | r                | 48.36               | 0.16             | 38.26                          | 0.41 | 0.07 | 7.11              | 0.95             | <DL  | 95.31 |
| 24    | c                | 48.87               | 0.34             | 31.40                          | 2.52 | 1.51 | 0.92              | 10.14            | 0.19 | 95.88 |
| 24    | r                | 49.20               | 0.27             | 30.87                          | 2.18 | 1.69 | 0.87              | 9.77             | 0.57 | 95.41 |
| 25    | c                | 48.30               | 0.32             | 31.09                          | 2.19 | 1.43 | 0.86              | 9.76             | 0.41 | 94.37 |
| 25    | r                | 47.54               | 0.00             | 37.49                          | 0.49 | 0.12 | 7.30              | 1.02             | <DL  | 93.95 |
| 26    | c                | 49.10               | 0.40             | 31.10                          | 2.11 | 1.59 | 0.86              | 9.81             | 0.38 | 95.35 |
| 26    | r                | 49.02               | 0.36             | 31.14                          | 2.00 | 1.71 | 1.09              | 10.01            | 0.51 | 95.85 |
| 27    | c                | 48.80               | 0.35             | 31.44                          | 2.00 | 1.60 | 1.03              | 10.11            | 0.14 | 95.47 |
| 27    | r                | 48.36               | 0.39             | 31.55                          | 1.92 | 1.51 | 1.33              | 9.51             | 0.37 | 94.94 |
| 28    | c                | 48.26               | 0.44             | 31.19                          | 2.12 | 1.56 | 1.00              | 9.58             | 0.15 | 94.31 |
| 28    | r                | 47.38               | 0.06             | 36.90                          | 0.48 | 0.10 | 6.65              | 1.15             | <DL  | 92.72 |
| 29    | c                | 48.54               | 0.30             | 30.05                          | 1.97 | 1.81 | 1.07              | 9.87             | 0.20 | 93.80 |
| 29    | r                | 47.56               | 0.33             | 31.10                          | 1.98 | 1.25 | 1.09              | 9.92             | 0.22 | 93.45 |
| 30    | c                | 48.36               | 0.28             | 31.77                          | 2.25 | 1.24 | 0.92              | 9.89             | <DL  | 94.71 |
| 30    | r                | 47.35               | 0.32             | 30.72                          | 2.24 | 1.15 | 1.10              | 9.48             | 0.22 | 92.58 |

Abbreviations: <DL = below detection limits, n.a. = not analyzed. CaO and MnO mostly close to or below DL.

<sup>1</sup> Core (c) or rim (r) of grains.

**Appendix C:** Phengite major element data (sample 09015).

| Grain | c/r <sup>1</sup> | Cation content (pfu; O=11) |       |       |       |       |       |       |       |       |
|-------|------------------|----------------------------|-------|-------|-------|-------|-------|-------|-------|-------|
|       |                  | Si                         | Ti    | Al    | Fe    | Mg    | Na    | K     | Ba    | Total |
| 1     | c                | 3.306                      | 0.013 | 2.399 | 0.125 | 0.151 | 0.098 | 0.851 | 0.009 | 6.955 |
| 1     | r                | 3.245                      | 0.017 | 2.466 | 0.133 | 0.150 | 0.116 | 0.847 | 0.010 | 6.987 |
| 2     | c                | 3.270                      | 0.016 | 2.442 | 0.145 | 0.137 | 0.126 | 0.833 | 0.001 | 6.972 |
| 2     | r                | 3.277                      | 0.011 | 2.422 | 0.118 | 0.180 | 0.139 | 0.820 | 0.012 | 6.980 |
| 3     | c                | 3.300                      | 0.013 | 2.402 | 0.112 | 0.172 | 0.128 | 0.818 | 0.001 | 6.956 |
| 3     | r                | 3.279                      | 0.018 | 2.407 | 0.117 | 0.170 | 0.136 | 0.863 | 0.008 | 6.999 |
| 4     | c                | 3.292                      | 0.014 | 2.408 | 0.122 | 0.167 | 0.139 | 0.823 | 0.008 | 6.972 |
| 4     | r                | 3.055                      | 0.007 | 2.876 | 0.022 | 0.008 | 0.937 | 0.055 | 0.005 | 6.996 |
| 5     | c                | 3.316                      | 0.014 | 2.380 | 0.109 | 0.166 | 0.137 | 0.843 | 0.005 | 6.971 |
| 5     | r                | 3.251                      | 0.015 | 2.445 | 0.109 | 0.184 | 0.152 | 0.831 | 0.011 | 7.002 |
| 6     | c                | 3.443                      | 0.010 | 2.114 | 0.158 | 0.275 | 0.064 | 0.879 | 0.012 | 6.960 |
| 6     | r                | 3.315                      | 0.012 | 2.365 | 0.123 | 0.176 | 0.154 | 0.816 | 0.011 | 6.976 |
| 7     | c                | 3.290                      | 0.009 | 2.413 | 0.119 | 0.170 | 0.106 | 0.873 | 0.005 | 6.984 |
| 7     | r                | 3.267                      | 0.017 | 2.456 | 0.121 | 0.151 | 0.120 | 0.813 | 0.007 | 6.954 |
| 8     | c                | 3.259                      | 0.016 | 2.468 | 0.104 | 0.159 | 0.135 | 0.819 | 0.007 | 6.968 |
| 8     | r                | 3.288                      | 0.011 | 2.422 | 0.109 | 0.184 | 0.126 | 0.807 | 0.008 | 6.956 |
| 9     | c                | 3.268                      | 0.012 | 2.450 | 0.135 | 0.151 | 0.121 | 0.825 | 0.004 | 6.968 |
| 9     | r                | 3.056                      | 0.003 | 2.875 | 0.025 | 0.011 | 0.882 | 0.127 | 0.006 | 7.008 |
| 10    | c                | 3.263                      | 0.015 | 2.460 | 0.110 | 0.151 | 0.145 | 0.799 | 0.016 | 6.963 |
| 10    | r                | 3.070                      | 0.004 | 2.879 | 0.020 | 0.006 | 0.858 | 0.104 | 0.000 | 6.968 |
| 11    | c                | 3.308                      | 0.014 | 2.390 | 0.125 | 0.172 | 0.103 | 0.816 | 0.011 | 6.942 |
| 11    | r                | 3.283                      | 0.018 | 2.403 | 0.111 | 0.190 | 0.131 | 0.823 | 0.006 | 6.974 |
| 12    | c                | 3.262                      | 0.016 | 2.458 | 0.104 | 0.149 | 0.154 | 0.832 | 0.011 | 6.986 |
| 12    | r                | 3.065                      | 0.004 | 2.875 | 0.021 | 0.006 | 0.881 | 0.096 | 0.009 | 6.981 |
| 13    | c                | 3.488                      | 0.011 | 2.072 | 0.130 | 0.294 | 0.075 | 0.838 | 0.009 | 6.922 |
| 13    | r                | 3.249                      | 0.018 | 2.464 | 0.110 | 0.145 | 0.200 | 0.798 | 0.010 | 6.998 |
| 14    | c                | 3.294                      | 0.016 | 2.385 | 0.121 | 0.185 | 0.121 | 0.838 | 0.012 | 6.977 |
| 14    | r                | 3.304                      | 0.015 | 2.376 | 0.121 | 0.189 | 0.107 | 0.849 | 0.008 | 6.972 |
| 15    | c                | 3.470                      | 0.012 | 2.090 | 0.157 | 0.269 | 0.045 | 0.884 | 0.007 | 6.937 |
| 15    | r                | 3.447                      | 0.016 | 2.129 | 0.122 | 0.293 | 0.067 | 0.838 | 0.008 | 6.924 |
| 16    | c                | 3.280                      | 0.008 | 2.435 | 0.124 | 0.156 | 0.109 | 0.858 | 0.006 | 6.978 |
| 16    | r                | 3.285                      | 0.017 | 2.403 | 0.129 | 0.168 | 0.114 | 0.854 | 0.008 | 6.980 |
| 17    | c                | 3.250                      | 0.017 | 2.475 | 0.126 | 0.141 | 0.106 | 0.844 | 0.010 | 6.970 |
| 17    | r                | 3.257                      | 0.016 | 2.434 | 0.127 | 0.178 | 0.137 | 0.805 | 0.019 | 6.981 |
| 18    | c                | 3.256                      | 0.014 | 2.446 | 0.127 | 0.170 | 0.120 | 0.830 | 0.011 | 6.981 |
| 18    | r                | 3.293                      | 0.018 | 2.389 | 0.128 | 0.179 | 0.121 | 0.828 | 0.005 | 6.968 |
| 19    | c                | 3.297                      | 0.016 | 2.371 | 0.136 | 0.185 | 0.124 | 0.851 | 0.003 | 6.988 |
| 19    | r                | 3.050                      | 0.006 | 2.874 | 0.028 | 0.010 | 0.927 | 0.092 | 0.000 | 7.014 |
| 20    | c                | 3.305                      | 0.015 | 2.362 | 0.122 | 0.198 | 0.120 | 0.849 | 0.012 | 6.984 |
| 20    | r                | 3.248                      | 0.016 | 2.476 | 0.102 | 0.155 | 0.157 | 0.821 | 0.012 | 6.987 |
| 21    | c                | 3.276                      | 0.009 | 2.414 | 0.116 | 0.185 | 0.138 | 0.840 | 0.017 | 6.997 |
| 21    | r                | 3.253                      | 0.012 | 2.448 | 0.127 | 0.165 | 0.118 | 0.868 | 0.010 | 7.003 |
| 22    | c                | 3.293                      | 0.017 | 2.405 | 0.130 | 0.152 | 0.104 | 0.870 | 0.000 | 6.974 |
| 22    | r                | 3.289                      | 0.017 | 2.409 | 0.109 | 0.165 | 0.140 | 0.826 | 0.010 | 6.971 |
| 23    | c                | 3.246                      | 0.014 | 2.485 | 0.110 | 0.148 | 0.151 | 0.822 | 0.006 | 6.984 |
| 23    | r                | 3.077                      | 0.008 | 2.869 | 0.022 | 0.007 | 0.877 | 0.077 | 0.002 | 6.958 |
| 24    | c                | 3.247                      | 0.017 | 2.459 | 0.140 | 0.149 | 0.118 | 0.860 | 0.005 | 6.995 |
| 24    | r                | 3.278                      | 0.013 | 2.424 | 0.121 | 0.168 | 0.112 | 0.830 | 0.015 | 6.967 |
| 25    | c                | 3.255                      | 0.016 | 2.469 | 0.123 | 0.143 | 0.113 | 0.839 | 0.011 | 6.970 |
| 25    | r                | 3.076                      | 0.000 | 2.859 | 0.027 | 0.011 | 0.916 | 0.084 | 0.000 | 6.995 |
| 26    | c                | 3.269                      | 0.020 | 2.441 | 0.117 | 0.158 | 0.111 | 0.833 | 0.010 | 6.962 |
| 26    | r                | 3.258                      | 0.018 | 2.439 | 0.111 | 0.169 | 0.141 | 0.849 | 0.013 | 6.999 |
| 27    | c                | 3.246                      | 0.018 | 2.465 | 0.111 | 0.159 | 0.133 | 0.858 | 0.004 | 6.998 |
| 27    | r                | 3.233                      | 0.019 | 2.486 | 0.107 | 0.151 | 0.173 | 0.811 | 0.010 | 6.996 |
| 28    | c                | 3.245                      | 0.022 | 2.471 | 0.119 | 0.157 | 0.131 | 0.822 | 0.004 | 6.973 |
| 28    | r                | 3.097                      | 0.003 | 2.843 | 0.026 | 0.010 | 0.843 | 0.096 | 0.002 | 6.946 |
| 29    | c                | 3.287                      | 0.015 | 2.399 | 0.112 | 0.183 | 0.141 | 0.853 | 0.005 | 6.995 |
| 29    | r                | 3.237                      | 0.017 | 2.494 | 0.113 | 0.127 | 0.144 | 0.861 | 0.006 | 7.002 |
| 30    | c                | 3.238                      | 0.014 | 2.507 | 0.126 | 0.123 | 0.120 | 0.845 | 0.000 | 6.976 |
| 30    | r                | 3.248                      | 0.017 | 2.483 | 0.128 | 0.118 | 0.146 | 0.830 | 0.006 | 6.981 |

<sup>1</sup> Core (c) or rim (r) of grains.

**Appendix C:** Phengite major element data (sample 09019).

| Grain | c/r <sup>1</sup> | Oxide content (wt%) |                  | Al <sub>2</sub> O <sub>3</sub> | FeO  | MgO  | Na <sub>2</sub> O | K <sub>2</sub> O | BaO  | Total |
|-------|------------------|---------------------|------------------|--------------------------------|------|------|-------------------|------------------|------|-------|
|       |                  | SiO <sub>2</sub>    | TiO <sub>2</sub> |                                |      |      |                   |                  |      |       |
| 1     | c                | 51.60               | 0.25             | 28.50                          | 2.37 | 2.84 | 0.49              | 10.01            | <DL  | 96.06 |
| 1     | r                | 49.66               | 0.41             | 31.55                          | 2.32 | 2.05 | 0.84              | 9.95             | <DL  | 96.78 |
| 2     | c                | 49.71               | 0.25             | 31.47                          | 2.63 | 2.16 | 0.72              | 9.70             | 0.48 | 97.12 |
| 2     | r                | 48.23               | 0.51             | 32.59                          | 2.10 | 1.69 | 0.79              | 9.71             | 0.41 | 96.04 |
| 3     | c                | 49.65               | 0.20             | 30.81                          | 2.60 | 2.34 | 0.80              | 9.37             | <DL  | 95.76 |
| 3     | r                | 50.39               | 0.21             | 31.08                          | 2.43 | 2.28 | 0.63              | 10.11            | 0.15 | 97.29 |
| 4     | c                | 52.08               | 0.19             | 28.01                          | 2.45 | 3.22 | 0.50              | 10.10            | 0.20 | 96.74 |
| 4     | r                | 50.90               | 0.09             | 30.30                          | 2.41 | 2.54 | 0.72              | 9.92             | 0.33 | 97.21 |
| 5     | c                | 51.81               | 0.10             | 28.71                          | 2.37 | 2.79 | 0.61              | 9.78             | 0.51 | 96.68 |
| 5     | r                | 48.67               | 0.35             | 33.43                          | 1.76 | 1.47 | 1.32              | 9.40             | 0.46 | 96.86 |
| 6     | c                | 48.99               | 0.16             | 32.66                          | 2.35 | 1.76 | 0.88              | 9.71             | <DL  | 96.51 |
| 6     | r                | 48.75               | 0.41             | 34.16                          | 1.82 | 1.34 | 0.99              | 9.72             | 0.28 | 97.47 |
| 7     | c                | 52.21               | 0.18             | 27.98                          | 2.17 | 2.99 | 0.54              | 9.65             | 0.29 | 96.01 |
| 7     | r                | 50.35               | 0.49             | 31.53                          | 2.19 | 1.92 | 0.76              | 10.02            | <DL  | 97.27 |
| 8     | c                | 49.96               | 0.20             | 31.55                          | 2.30 | 1.89 | 0.78              | 10.08            | 0.34 | 97.10 |
| 8     | r                | 49.52               | 0.37             | 31.78                          | 2.45 | 1.95 | 0.92              | 9.90             | 0.41 | 97.30 |
| 9     | c                | 51.02               | 0.26             | 30.28                          | 2.44 | 2.58 | 0.64              | 10.05            | 0.19 | 97.46 |
| 9     | r                | 50.28               | 0.46             | 31.60                          | 2.15 | 2.05 | 1.06              | 9.59             | <DL  | 97.19 |
| 10    | c                | 49.10               | 0.20             | 32.37                          | 2.26 | 1.75 | 1.03              | 9.91             | <DL  | 96.62 |
| 10    | r                | 49.24               | 0.40             | 32.25                          | 2.07 | 1.58 | 0.78              | 9.75             | 0.15 | 96.22 |
| 11    | c                | 50.64               | 0.28             | 31.03                          | 2.42 | 2.11 | 0.71              | 10.33            | 0.41 | 97.92 |
| 11    | r                | 51.46               | 0.26             | 31.00                          | 2.25 | 2.27 | 0.63              | 9.82             | 0.39 | 98.09 |
| 12    | c                | 49.76               | 0.22             | 29.94                          | 2.62 | 2.34 | 0.50              | 10.60            | 0.15 | 96.13 |
| 12    | r                | 47.45               | 0.20             | 28.73                          | 2.53 | 2.24 | 0.41              | 9.79             | 0.33 | 91.69 |
| 13    | c                | 52.27               | 0.29             | 28.77                          | 2.35 | 2.71 | 0.51              | 10.21            | 0.19 | 97.30 |
| 13    | r                | 49.27               | 0.24             | 31.66                          | 2.10 | 1.78 | 0.85              | 9.97             | 0.52 | 96.38 |
| 14    | c                | 48.95               | 0.50             | 33.63                          | 2.19 | 1.30 | 0.87              | 10.19            | 0.28 | 97.91 |
| 14    | r                | 50.87               | 0.22             | 30.67                          | 2.27 | 2.14 | 0.70              | 10.12            | 0.18 | 97.17 |
| 15    | c                | 50.16               | 0.28             | 31.44                          | 2.21 | 1.87 | 0.71              | 10.39            | 0.41 | 97.48 |
| 15    | r                | 49.78               | 0.45             | 32.71                          | 1.96 | 1.44 | 1.27              | 9.41             | <DL  | 97.02 |
| 16    | c                | 49.82               | 0.33             | 31.94                          | 2.25 | 1.93 | 1.05              | 10.00            | 0.50 | 97.81 |
| 16    | r                | 49.97               | 0.18             | 29.85                          | 2.39 | 2.30 | 0.52              | 10.35            | 0.38 | 95.94 |
| 17    | c                | 51.10               | 0.28             | 29.94                          | 2.33 | 2.46 | 0.53              | 10.16            | <DL  | 96.81 |
| 17    | r                | 50.96               | 0.31             | 31.41                          | 2.17 | 2.16 | 0.64              | 10.18            | 0.19 | 98.02 |
| 18    | c                | 50.70               | 0.29             | 30.50                          | 2.58 | 2.28 | 0.67              | 10.30            | <DL  | 97.32 |
| 18    | r                | 49.63               | 0.45             | 32.20                          | 2.06 | 1.83 | 0.75              | 10.14            | 0.47 | 97.53 |
| 19    | c                | 53.44               | 0.25             | 28.16                          | 2.25 | 2.98 | 0.54              | 10.21            | 0.17 | 98.00 |
| 19    | r                | 50.25               | 0.37             | 30.28                          | 2.33 | 2.13 | 0.68              | 10.20            | 0.18 | 96.43 |
| 20    | c                | 49.87               | 0.17             | 31.61                          | 2.19 | 1.93 | 0.87              | 9.73             | 0.22 | 96.59 |
| 20    | r                | 49.37               | 0.38             | 32.33                          | 2.08 | 1.58 | 0.94              | 10.31            | <DL  | 96.99 |
| 21    | c                | 50.18               | 0.16             | 30.69                          | 2.07 | 2.11 | 0.71              | 10.14            | <DL  | 96.06 |
| 21    | r                | 48.70               | 0.41             | 32.05                          | 2.22 | 1.64 | 0.86              | 10.15            | <DL  | 96.03 |
| 22    | c                | 52.86               | 0.22             | 28.75                          | 2.33 | 2.92 | 0.51              | 10.14            | 0.39 | 98.11 |
| 22    | r                | 49.24               | 0.52             | 33.08                          | 1.88 | 1.27 | 1.27              | 9.55             | 0.12 | 96.81 |
| 23    | c                | 50.71               | 0.22             | 29.64                          | 2.53 | 2.33 | 0.32              | 10.74            | 0.48 | 96.97 |
| 23    | r                | 50.40               | 0.28             | 29.34                          | 2.51 | 2.44 | 0.54              | 10.64            | 0.39 | 96.53 |
| 24    | c                | 53.06               | 0.26             | 27.96                          | 2.68 | 2.83 | 0.50              | 10.29            | 0.31 | 97.89 |
| 24    | r                | 51.24               | 0.19             | 26.89                          | 2.32 | 2.98 | 0.47              | 10.14            | <DL  | 94.24 |
| 25    | c                | 51.24               | 0.24             | 29.77                          | 2.49 | 2.47 | 0.69              | 10.24            | 0.30 | 97.44 |
| 25    | r                | 50.73               | 0.34             | 31.27                          | 2.23 | 2.19 | 0.68              | 10.26            | 0.16 | 97.85 |
| 26    | c                | 52.51               | 0.17             | 28.13                          | 2.41 | 2.91 | 0.59              | 10.01            | 0.29 | 97.02 |
| 26    | r                | 49.81               | 0.43             | 30.92                          | 2.21 | 2.16 | 0.81              | 9.96             | 0.46 | 96.76 |
| 27    | c                | 50.11               | 0.40             | 31.09                          | 2.34 | 2.01 | 0.82              | 10.23            | 0.25 | 97.26 |
| 27    | r                | 48.72               | 0.42             | 32.75                          | 2.00 | 1.58 | 1.01              | 10.38            | 0.35 | 97.20 |
| 28    | c                | 53.76               | 0.20             | 26.69                          | 2.44 | 3.33 | 0.51              | 10.06            | <DL  | 96.99 |
| 28    | r                | 51.67               | 0.27             | 30.63                          | 2.38 | 2.24 | 0.72              | 10.15            | <DL  | 98.06 |
| 29    | c                | 50.37               | 0.23             | 30.01                          | 2.69 | 2.42 | 0.62              | 10.29            | <DL  | 96.63 |
| 29    | r                | 50.22               | 0.30             | 29.28                          | 2.85 | 2.38 | 0.49              | 10.60            | 0.23 | 96.35 |
| 30    | c                | 52.92               | 0.21             | 27.79                          | 2.26 | 2.90 | 0.62              | 9.96             | <DL  | 96.66 |
| 30    | r                | 50.02               | 0.29             | 31.96                          | 1.73 | 1.77 | 0.77              | 10.20            | 0.32 | 97.05 |

Abbreviations: <DL = below detection limits, n.a. = not analyzed. CaO and MnO mostly close to or below DL.

<sup>1</sup> Core (c) or rim (r) of grains.

**Appendix C:** Phengite major element data (sample 09019).

| Grain | c/r <sup>1</sup> | Cation content (pfu; O=11) |       |       |       |       |       |       |       | Total |
|-------|------------------|----------------------------|-------|-------|-------|-------|-------|-------|-------|-------|
|       |                  | Si                         | Ti    | Al    | Fe    | Mg    | Na    | K     | Ba    |       |
| 1     | c                | 3.396                      | 0.013 | 2.210 | 0.130 | 0.279 | 0.062 | 0.840 | 0.003 | 6.937 |
| 1     | r                | 3.254                      | 0.020 | 2.437 | 0.127 | 0.200 | 0.106 | 0.832 | 0.000 | 6.976 |
| 2     | c                | 3.255                      | 0.012 | 2.428 | 0.144 | 0.211 | 0.092 | 0.810 | 0.012 | 6.969 |
| 2     | r                | 3.191                      | 0.025 | 2.541 | 0.116 | 0.167 | 0.102 | 0.820 | 0.011 | 6.974 |
| 3     | c                | 3.280                      | 0.010 | 2.399 | 0.144 | 0.230 | 0.102 | 0.790 | 0.001 | 6.957 |
| 3     | r                | 3.287                      | 0.010 | 2.390 | 0.133 | 0.222 | 0.080 | 0.841 | 0.004 | 6.968 |
| 4     | c                | 3.413                      | 0.009 | 2.163 | 0.134 | 0.315 | 0.064 | 0.844 | 0.005 | 6.950 |
| 4     | r                | 3.323                      | 0.005 | 2.331 | 0.132 | 0.247 | 0.091 | 0.826 | 0.008 | 6.965 |
| 5     | c                | 3.398                      | 0.005 | 2.219 | 0.130 | 0.273 | 0.078 | 0.818 | 0.013 | 6.935 |
| 5     | r                | 3.185                      | 0.017 | 2.578 | 0.096 | 0.143 | 0.167 | 0.785 | 0.012 | 6.985 |
| 6     | c                | 3.215                      | 0.008 | 2.526 | 0.129 | 0.172 | 0.112 | 0.813 | 0.000 | 6.977 |
| 6     | r                | 3.167                      | 0.020 | 2.615 | 0.099 | 0.130 | 0.125 | 0.806 | 0.007 | 6.971 |
| 7     | c                | 3.434                      | 0.009 | 2.169 | 0.119 | 0.293 | 0.069 | 0.810 | 0.007 | 6.911 |
| 7     | r                | 3.275                      | 0.024 | 2.417 | 0.119 | 0.186 | 0.096 | 0.832 | 0.001 | 6.954 |
| 8     | c                | 3.269                      | 0.010 | 2.433 | 0.126 | 0.184 | 0.099 | 0.841 | 0.009 | 6.974 |
| 8     | r                | 3.238                      | 0.018 | 2.449 | 0.134 | 0.190 | 0.117 | 0.826 | 0.010 | 6.989 |
| 9     | c                | 3.320                      | 0.013 | 2.322 | 0.133 | 0.250 | 0.081 | 0.834 | 0.005 | 6.962 |
| 9     | r                | 3.268                      | 0.023 | 2.421 | 0.117 | 0.199 | 0.133 | 0.795 | 0.002 | 6.962 |
| 10    | c                | 3.221                      | 0.010 | 2.503 | 0.124 | 0.171 | 0.131 | 0.829 | 0.003 | 6.997 |
| 10    | r                | 3.237                      | 0.020 | 2.498 | 0.114 | 0.155 | 0.099 | 0.818 | 0.004 | 6.952 |
| 11    | c                | 3.292                      | 0.014 | 2.377 | 0.132 | 0.204 | 0.089 | 0.857 | 0.010 | 6.979 |
| 11    | r                | 3.322                      | 0.013 | 2.358 | 0.121 | 0.218 | 0.079 | 0.809 | 0.010 | 6.930 |
| 12    | c                | 3.302                      | 0.011 | 2.341 | 0.145 | 0.231 | 0.064 | 0.897 | 0.004 | 6.998 |
| 12    | r                | 3.298                      | 0.011 | 2.353 | 0.147 | 0.232 | 0.055 | 0.868 | 0.009 | 6.976 |
| 13    | c                | 3.403                      | 0.014 | 2.208 | 0.128 | 0.263 | 0.065 | 0.848 | 0.005 | 6.935 |
| 13    | r                | 3.252                      | 0.012 | 2.463 | 0.116 | 0.175 | 0.108 | 0.839 | 0.013 | 6.979 |
| 14    | c                | 3.179                      | 0.024 | 2.574 | 0.119 | 0.126 | 0.110 | 0.844 | 0.007 | 6.987 |
| 14    | r                | 3.318                      | 0.011 | 2.358 | 0.124 | 0.208 | 0.089 | 0.842 | 0.005 | 6.957 |
| 15    | c                | 3.275                      | 0.014 | 2.420 | 0.121 | 0.182 | 0.090 | 0.865 | 0.011 | 6.978 |
| 15    | r                | 3.237                      | 0.022 | 2.507 | 0.107 | 0.139 | 0.160 | 0.781 | 0.003 | 6.958 |
| 16    | c                | 3.243                      | 0.016 | 2.451 | 0.122 | 0.187 | 0.133 | 0.831 | 0.013 | 6.996 |
| 16    | r                | 3.317                      | 0.009 | 2.335 | 0.133 | 0.228 | 0.066 | 0.877 | 0.010 | 6.977 |
| 17    | c                | 3.342                      | 0.014 | 2.308 | 0.127 | 0.240 | 0.067 | 0.848 | 0.000 | 6.948 |
| 17    | r                | 3.295                      | 0.015 | 2.393 | 0.117 | 0.208 | 0.081 | 0.840 | 0.005 | 6.954 |
| 18    | c                | 3.307                      | 0.014 | 2.345 | 0.141 | 0.222 | 0.084 | 0.857 | 0.002 | 6.975 |
| 18    | r                | 3.234                      | 0.022 | 2.473 | 0.112 | 0.178 | 0.094 | 0.843 | 0.012 | 6.974 |
| 19    | c                | 3.448                      | 0.012 | 2.141 | 0.121 | 0.287 | 0.067 | 0.840 | 0.004 | 6.923 |
| 19    | r                | 3.310                      | 0.018 | 2.351 | 0.128 | 0.209 | 0.087 | 0.857 | 0.005 | 6.968 |
| 20    | c                | 3.270                      | 0.009 | 2.443 | 0.120 | 0.189 | 0.110 | 0.814 | 0.006 | 6.961 |
| 20    | r                | 3.230                      | 0.019 | 2.493 | 0.114 | 0.154 | 0.119 | 0.860 | 0.003 | 6.994 |
| 21    | c                | 3.307                      | 0.008 | 2.384 | 0.114 | 0.207 | 0.091 | 0.852 | 0.002 | 6.965 |
| 21    | r                | 3.221                      | 0.020 | 2.498 | 0.123 | 0.162 | 0.111 | 0.856 | 0.002 | 6.993 |
| 22    | c                | 3.414                      | 0.010 | 2.189 | 0.126 | 0.281 | 0.064 | 0.836 | 0.010 | 6.930 |
| 22    | r                | 3.212                      | 0.025 | 2.543 | 0.103 | 0.124 | 0.161 | 0.795 | 0.003 | 6.969 |
| 23    | c                | 3.338                      | 0.011 | 2.299 | 0.139 | 0.229 | 0.041 | 0.902 | 0.012 | 6.973 |
| 23    | r                | 3.334                      | 0.014 | 2.287 | 0.139 | 0.241 | 0.069 | 0.898 | 0.010 | 6.992 |
| 24    | c                | 3.441                      | 0.013 | 2.137 | 0.145 | 0.274 | 0.062 | 0.851 | 0.008 | 6.934 |
| 24    | r                | 3.445                      | 0.010 | 2.130 | 0.130 | 0.299 | 0.062 | 0.870 | 0.001 | 6.946 |
| 25    | c                | 3.343                      | 0.012 | 2.289 | 0.136 | 0.240 | 0.087 | 0.852 | 0.008 | 6.970 |
| 25    | r                | 3.288                      | 0.016 | 2.389 | 0.121 | 0.212 | 0.085 | 0.848 | 0.004 | 6.967 |
| 26    | c                | 3.428                      | 0.008 | 2.164 | 0.132 | 0.283 | 0.074 | 0.834 | 0.008 | 6.935 |
| 26    | r                | 3.274                      | 0.021 | 2.395 | 0.121 | 0.212 | 0.104 | 0.835 | 0.012 | 6.977 |
| 27    | c                | 3.277                      | 0.020 | 2.396 | 0.128 | 0.196 | 0.104 | 0.853 | 0.006 | 6.984 |
| 27    | r                | 3.194                      | 0.021 | 2.530 | 0.110 | 0.154 | 0.128 | 0.868 | 0.009 | 7.018 |
| 28    | c                | 3.498                      | 0.010 | 2.047 | 0.133 | 0.323 | 0.065 | 0.835 | 0.003 | 6.918 |
| 28    | r                | 3.335                      | 0.013 | 2.330 | 0.128 | 0.216 | 0.090 | 0.836 | 0.000 | 6.949 |
| 29    | c                | 3.313                      | 0.011 | 2.326 | 0.148 | 0.237 | 0.079 | 0.863 | 0.002 | 6.983 |
| 29    | r                | 3.329                      | 0.015 | 2.288 | 0.158 | 0.235 | 0.063 | 0.897 | 0.006 | 6.992 |
| 30    | c                | 3.453                      | 0.010 | 2.137 | 0.123 | 0.282 | 0.078 | 0.829 | 0.001 | 6.920 |
| 30    | r                | 3.265                      | 0.014 | 2.459 | 0.094 | 0.172 | 0.097 | 0.849 | 0.008 | 6.963 |

<sup>1</sup> Core (c) or rim (r) of grains.

**Appendix C:** Phengite major element data (sample 12001).

| Grain | c/r <sup>1</sup> | Oxide content (wt%) |                  | Al <sub>2</sub> O <sub>3</sub> | FeO  | MgO  | Na <sub>2</sub> O | K <sub>2</sub> O | BaO  | Total |
|-------|------------------|---------------------|------------------|--------------------------------|------|------|-------------------|------------------|------|-------|
|       |                  | SiO <sub>2</sub>    | TiO <sub>2</sub> |                                |      |      |                   |                  |      |       |
| 1     | c                | 48.24               | 0.54             | 34.06                          | 2.20 | 0.95 | 1.77              | 8.66             | 0.29 | 96.70 |
| 1     | r                | 49.33               | 0.52             | 32.96                          | 2.08 | 1.31 | 1.47              | 9.03             | 0.73 | 97.43 |
| 2     | c                | 51.21               | 0.38             | 30.92                          | 2.36 | 2.23 | 1.37              | 9.27             | 0.38 | 98.12 |
| 2     | r                | 50.94               | 0.51             | 31.22                          | 2.19 | 1.85 | 1.07              | 9.54             | 0.56 | 97.87 |
| 3     | c                | 52.71               | 0.18             | 27.98                          | 2.52 | 2.69 | 0.94              | 9.28             | 0.16 | 96.46 |
| 3     | r                | 49.93               | 0.23             | 30.38                          | 2.56 | 1.87 | 1.09              | 9.51             | <DL  | 95.58 |
| 4     | c                | 49.73               | 0.62             | 32.56                          | 2.45 | 1.46 | 1.59              | 8.79             | 0.15 | 97.35 |
| 4     | r                | 47.93               | 0.61             | 34.79                          | 2.60 | 0.80 | 1.86              | 8.55             | 0.69 | 97.83 |
| 5     | c                | 49.56               | 0.68             | 32.14                          | 2.46 | 1.54 | 1.57              | 9.05             | 0.59 | 97.60 |
| 5     | r                | 49.57               | 0.48             | 32.35                          | 2.58 | 1.48 | 1.47              | 8.76             | 0.38 | 97.07 |
| 6     | c                | 48.14               | 0.37             | 35.97                          | 2.04 | 0.72 | 2.09              | 8.67             | 0.33 | 98.33 |
| 6     | r                | 47.92               | 0.40             | 34.40                          | 2.09 | 0.91 | 2.17              | 8.12             | 0.66 | 96.67 |
| 7     | c                | 50.30               | 0.44             | 32.07                          | 2.63 | 1.70 | 1.35              | 8.95             | 0.55 | 97.99 |
| 7     | r                | 49.69               | 0.30             | 32.11                          | 2.18 | 1.39 | 1.68              | 9.08             | 0.42 | 96.85 |
| 8     | c                | 47.83               | 0.59             | 34.89                          | 2.64 | 0.72 | 1.67              | 8.87             | 0.48 | 97.69 |
| 8     | r                | 47.37               | 0.55             | 34.75                          | 2.31 | 0.73 | 1.71              | 8.82             | 0.71 | 96.95 |
| 9     | c                | 47.88               | 0.42             | 35.00                          | 1.86 | 0.73 | 1.87              | 8.58             | 0.32 | 96.66 |
| 9     | r                | 48.01               | 0.18             | 39.48                          | 0.82 | 0.13 | 6.48              | 1.36             | 0.30 | 96.76 |
| 10    | c                | 50.25               | 0.39             | 29.12                          | 2.68 | 2.25 | 1.15              | 8.82             | 0.31 | 94.97 |
| 10    | r                | 50.69               | 0.42             | 30.57                          | 3.25 | 2.07 | 1.17              | 9.23             | 0.40 | 97.79 |
| 11    | c                | 50.31               | 0.44             | 31.42                          | 2.30 | 1.93 | 1.43              | 9.09             | 0.61 | 97.53 |
| 11    | r                | 50.02               | 0.38             | 30.67                          | 2.23 | 2.21 | 1.25              | 9.25             | 0.41 | 96.42 |
| 12    | c                | 47.90               | 0.47             | 34.70                          | 2.32 | 0.89 | 1.67              | 8.65             | 0.57 | 97.17 |
| 12    | r                | 49.19               | 0.58             | 32.83                          | 2.72 | 1.31 | 1.52              | 8.80             | 0.71 | 97.65 |
| 13    | c                | 49.31               | 0.44             | 31.85                          | 2.63 | 1.68 | 1.35              | 8.97             | 0.29 | 96.52 |
| 13    | r                | 50.15               | 0.41             | 30.99                          | 2.57 | 1.98 | 1.23              | 9.35             | 0.30 | 96.98 |
| 14    | c                | 48.22               | 0.60             | 35.38                          | 2.42 | 0.75 | 1.68              | 8.98             | 0.52 | 98.55 |
| 14    | r                | 47.60               | 0.63             | 34.73                          | 2.34 | 0.84 | 1.81              | 8.54             | 0.52 | 97.00 |
| 15    | c                | 48.43               | 0.18             | 39.86                          | 0.91 | 0.12 | 6.37              | 1.22             | 0.16 | 97.25 |
| 15    | r                | 47.30               | 0.18             | 39.41                          | 0.87 | 0.11 | 6.98              | 0.96             | <DL  | 95.81 |
| 16    | c                | 49.09               | 0.38             | 33.00                          | 2.47 | 1.33 | 1.67              | 8.73             | 0.37 | 97.04 |
| 16    | r                | 49.40               | 0.51             | 32.19                          | 2.54 | 1.48 | 1.48              | 8.64             | 0.57 | 96.82 |
| 17    | c                | 48.24               | 0.63             | 34.29                          | 2.47 | 1.03 | 1.85              | 8.63             | 0.70 | 97.85 |
| 17    | r                | 38.90               | 0.36             | 25.15                          | 1.80 | 0.93 | 1.40              | 5.69             | 0.29 | 74.52 |
| 18    | c                | 48.68               | 0.59             | 31.92                          | 2.39 | 1.46 | 1.42              | 9.24             | 0.39 | 96.09 |
| 18    | r                | 48.34               | 0.52             | 34.14                          | 2.24 | 0.98 | 2.12              | 8.29             | 0.42 | 97.05 |
| 19    | c                | 48.25               | 0.49             | 33.35                          | 2.61 | 1.07 | 1.66              | 8.58             | 0.85 | 96.86 |
| 19    | r                | 47.65               | 0.60             | 33.43                          | 2.43 | 0.90 | 1.52              | 8.98             | 0.70 | 96.21 |
| 20    | c                | 48.31               | 0.50             | 33.54                          | 2.62 | 1.13 | 1.64              | 8.99             | 0.57 | 97.30 |
| 20    | r                | 48.28               | 0.55             | 34.70                          | 2.43 | 0.86 | 2.05              | 8.31             | 0.79 | 97.97 |
| 21    | c                | 47.17               | 0.55             | 34.90                          | 2.29 | 0.72 | 2.01              | 8.90             | 0.90 | 97.44 |
| 21    | r                | 47.20               | 0.65             | 33.79                          | 2.36 | 0.79 | 1.89              | 8.59             | 0.76 | 96.03 |
| 22    | c                | 49.23               | 0.54             | 32.52                          | 2.33 | 1.51 | 1.58              | 9.15             | 0.32 | 97.17 |
| 22    | r                | 47.77               | 0.73             | 34.50                          | 2.48 | 0.88 | 1.90              | 8.65             | 0.54 | 97.45 |
| 23    | c                | 50.35               | 0.41             | 32.23                          | 2.38 | 1.74 | 1.50              | 8.74             | 0.74 | 98.09 |
| 23    | r                | 49.73               | 0.61             | 33.23                          | 2.24 | 1.24 | 1.81              | 8.69             | 0.71 | 98.26 |
| 24    | c                | 47.81               | 0.69             | 34.59                          | 2.43 | 0.84 | 1.78              | 8.46             | 0.28 | 96.88 |
| 24    | r                | 47.46               | 0.62             | 34.77                          | 2.39 | 0.79 | 1.84              | 8.46             | 0.77 | 97.10 |
| 25    | c                | 48.35               | 0.49             | 33.64                          | 2.11 | 0.97 | 1.76              | 8.77             | <DL  | 96.09 |
| 25    | r                | 47.47               | 0.52             | 34.16                          | 2.15 | 0.84 | 1.84              | 8.98             | 0.16 | 96.13 |
| 26    | c                | 49.39               | 0.62             | 32.58                          | 2.37 | 1.53 | 1.43              | 9.15             | 0.34 | 97.41 |
| 26    | r                | 48.07               | 0.44             | 34.62                          | 2.14 | 0.81 | 2.35              | 7.84             | 0.44 | 96.71 |
| 27    | c                | 49.23               | 0.39             | 32.69                          | 2.51 | 1.47 | 1.43              | 9.00             | 0.39 | 97.11 |
| 27    | r                | 50.49               | 0.55             | 30.56                          | 2.40 | 1.95 | 1.18              | 9.28             | 0.32 | 96.73 |
| 28    | c                | 47.93               | 0.55             | 34.76                          | 2.48 | 0.91 | 1.92              | 8.68             | 0.74 | 97.98 |
| 28    | r                | 47.68               | 0.54             | 34.74                          | 2.38 | 0.73 | 1.72              | 8.95             | 0.94 | 97.68 |
| 29    | c                | 48.60               | 0.45             | 34.11                          | 2.30 | 1.04 | 1.85              | 8.46             | 0.29 | 97.11 |
| 29    | r                | 48.06               | 0.49             | 35.70                          | 1.73 | 0.68 | 2.22              | 8.15             | 0.54 | 97.56 |
| 30    | c                | 49.55               | 0.45             | 32.21                          | 2.74 | 1.58 | 1.51              | 8.98             | 0.30 | 97.31 |
| 30    | r                | 50.18               | 0.37             | 30.81                          | 2.66 | 1.85 | 1.20              | 9.41             | 0.39 | 96.87 |

Abbreviations: &lt;DL = below detection limits, n.a. = not analyzed. CaO and MnO mostly close to or below DL.

<sup>1</sup> Core (c) or rim (r) of grains.

Appendix C: Phengite major element data (sample 12001).

| Grain | c/r <sup>1</sup> | Cation content (pfu; O=11) |       |       |       |       |       |       |       | Total |
|-------|------------------|----------------------------|-------|-------|-------|-------|-------|-------|-------|-------|
|       |                  | Si                         | Ti    | Al    | Fe    | Mg    | Na    | K     | Ba    |       |
| 1     | c                | 3.155                      | 0.026 | 2.625 | 0.120 | 0.092 | 0.224 | 0.723 | 0.007 | 6.978 |
| 1     | r                | 3.212                      | 0.025 | 2.529 | 0.113 | 0.127 | 0.186 | 0.750 | 0.019 | 6.964 |
| 2     | c                | 3.307                      | 0.018 | 2.353 | 0.127 | 0.215 | 0.172 | 0.764 | 0.010 | 6.966 |
| 2     | r                | 3.299                      | 0.025 | 2.383 | 0.119 | 0.179 | 0.134 | 0.788 | 0.014 | 6.944 |
| 3     | c                | 3.447                      | 0.009 | 2.157 | 0.138 | 0.262 | 0.119 | 0.774 | 0.004 | 6.912 |
| 3     | r                | 3.308                      | 0.012 | 2.372 | 0.142 | 0.185 | 0.141 | 0.804 | 0.003 | 6.966 |
| 4     | c                | 3.229                      | 0.030 | 2.492 | 0.133 | 0.142 | 0.200 | 0.728 | 0.004 | 6.959 |
| 4     | r                | 3.114                      | 0.030 | 2.664 | 0.141 | 0.077 | 0.234 | 0.709 | 0.018 | 6.993 |
| 5     | c                | 3.228                      | 0.033 | 2.467 | 0.134 | 0.150 | 0.198 | 0.752 | 0.015 | 6.980 |
| 5     | r                | 3.234                      | 0.024 | 2.487 | 0.141 | 0.144 | 0.186 | 0.729 | 0.010 | 6.956 |
| 6     | c                | 3.097                      | 0.018 | 2.727 | 0.110 | 0.069 | 0.261 | 0.712 | 0.008 | 7.006 |
| 6     | r                | 3.139                      | 0.020 | 2.655 | 0.114 | 0.089 | 0.276 | 0.678 | 0.017 | 6.990 |
| 7     | c                | 3.256                      | 0.021 | 2.447 | 0.142 | 0.164 | 0.169 | 0.739 | 0.014 | 6.953 |
| 7     | r                | 3.251                      | 0.015 | 2.476 | 0.119 | 0.135 | 0.213 | 0.758 | 0.011 | 6.981 |
| 8     | c                | 3.112                      | 0.029 | 2.675 | 0.144 | 0.070 | 0.211 | 0.736 | 0.012 | 6.993 |
| 8     | r                | 3.107                      | 0.027 | 2.686 | 0.127 | 0.071 | 0.217 | 0.738 | 0.018 | 6.999 |
| 9     | c                | 3.127                      | 0.021 | 2.694 | 0.102 | 0.071 | 0.237 | 0.715 | 0.008 | 6.979 |
| 9     | r                | 3.022                      | 0.009 | 2.929 | 0.043 | 0.012 | 0.791 | 0.109 | 0.007 | 6.955 |
| 10    | c                | 3.348                      | 0.020 | 2.287 | 0.149 | 0.224 | 0.148 | 0.750 | 0.008 | 6.937 |
| 10    | r                | 3.299                      | 0.020 | 2.345 | 0.177 | 0.201 | 0.147 | 0.766 | 0.010 | 6.965 |
| 11    | c                | 3.271                      | 0.022 | 2.407 | 0.125 | 0.187 | 0.180 | 0.754 | 0.015 | 6.969 |
| 11    | r                | 3.289                      | 0.019 | 2.376 | 0.123 | 0.217 | 0.159 | 0.776 | 0.011 | 6.972 |
| 12    | c                | 3.127                      | 0.023 | 2.670 | 0.127 | 0.086 | 0.211 | 0.720 | 0.015 | 6.980 |
| 12    | r                | 3.203                      | 0.028 | 2.520 | 0.148 | 0.127 | 0.192 | 0.731 | 0.018 | 6.970 |
| 13    | c                | 3.239                      | 0.022 | 2.466 | 0.144 | 0.165 | 0.172 | 0.752 | 0.007 | 6.968 |
| 13    | r                | 3.282                      | 0.020 | 2.390 | 0.141 | 0.193 | 0.156 | 0.781 | 0.008 | 6.971 |
| 14    | c                | 3.109                      | 0.029 | 2.689 | 0.130 | 0.072 | 0.210 | 0.739 | 0.013 | 6.992 |
| 14    | r                | 3.113                      | 0.031 | 2.677 | 0.128 | 0.081 | 0.230 | 0.713 | 0.013 | 6.988 |
| 15    | c                | 3.023                      | 0.008 | 2.932 | 0.048 | 0.011 | 0.771 | 0.097 | 0.004 | 6.936 |
| 15    | r                | 2.996                      | 0.008 | 2.942 | 0.046 | 0.010 | 0.857 | 0.078 | 0.000 | 6.992 |
| 16    | c                | 3.205                      | 0.019 | 2.539 | 0.135 | 0.129 | 0.211 | 0.727 | 0.009 | 6.976 |
| 16    | r                | 3.234                      | 0.025 | 2.484 | 0.139 | 0.144 | 0.188 | 0.722 | 0.015 | 6.953 |
| 17    | c                | 3.134                      | 0.031 | 2.626 | 0.134 | 0.100 | 0.233 | 0.715 | 0.018 | 6.995 |
| 17    | r                | 3.267                      | 0.023 | 2.490 | 0.126 | 0.116 | 0.228 | 0.610 | 0.009 | 6.883 |
| 18    | c                | 3.220                      | 0.029 | 2.488 | 0.132 | 0.144 | 0.182 | 0.780 | 0.010 | 6.987 |
| 18    | r                | 3.151                      | 0.025 | 2.623 | 0.122 | 0.095 | 0.268 | 0.689 | 0.011 | 6.990 |
| 19    | c                | 3.170                      | 0.024 | 2.583 | 0.143 | 0.105 | 0.211 | 0.719 | 0.022 | 6.979 |
| 19    | r                | 3.150                      | 0.030 | 2.605 | 0.134 | 0.089 | 0.195 | 0.757 | 0.018 | 6.991 |
| 20    | c                | 3.159                      | 0.025 | 2.585 | 0.143 | 0.110 | 0.208 | 0.750 | 0.015 | 7.001 |
| 20    | r                | 3.129                      | 0.027 | 2.651 | 0.132 | 0.083 | 0.258 | 0.687 | 0.020 | 6.989 |
| 21    | c                | 3.092                      | 0.027 | 2.696 | 0.126 | 0.070 | 0.255 | 0.744 | 0.023 | 7.033 |
| 21    | r                | 3.129                      | 0.033 | 2.640 | 0.131 | 0.078 | 0.243 | 0.726 | 0.020 | 7.003 |
| 22    | c                | 3.214                      | 0.026 | 2.502 | 0.127 | 0.147 | 0.200 | 0.762 | 0.008 | 6.989 |
| 22    | r                | 3.115                      | 0.036 | 2.652 | 0.135 | 0.085 | 0.240 | 0.720 | 0.014 | 7.002 |
| 23    | c                | 3.253                      | 0.020 | 2.454 | 0.129 | 0.168 | 0.188 | 0.720 | 0.019 | 6.954 |
| 23    | r                | 3.209                      | 0.030 | 2.527 | 0.121 | 0.119 | 0.226 | 0.715 | 0.018 | 6.968 |
| 24    | c                | 3.122                      | 0.034 | 2.662 | 0.133 | 0.081 | 0.225 | 0.705 | 0.007 | 6.977 |
| 24    | r                | 3.107                      | 0.030 | 2.682 | 0.131 | 0.077 | 0.234 | 0.706 | 0.020 | 6.991 |
| 25    | c                | 3.175                      | 0.024 | 2.604 | 0.116 | 0.095 | 0.224 | 0.735 | 0.003 | 6.978 |
| 25    | r                | 3.129                      | 0.026 | 2.654 | 0.119 | 0.083 | 0.235 | 0.755 | 0.004 | 7.011 |
| 26    | c                | 3.214                      | 0.030 | 2.499 | 0.129 | 0.149 | 0.180 | 0.760 | 0.009 | 6.976 |
| 26    | r                | 3.138                      | 0.022 | 2.663 | 0.117 | 0.079 | 0.297 | 0.653 | 0.011 | 6.983 |
| 27    | c                | 3.215                      | 0.019 | 2.516 | 0.137 | 0.143 | 0.181 | 0.750 | 0.010 | 6.973 |
| 27    | r                | 3.306                      | 0.027 | 2.358 | 0.131 | 0.190 | 0.149 | 0.775 | 0.008 | 6.950 |
| 28    | c                | 3.114                      | 0.027 | 2.662 | 0.135 | 0.089 | 0.242 | 0.719 | 0.019 | 7.008 |
| 28    | r                | 3.113                      | 0.027 | 2.673 | 0.130 | 0.071 | 0.218 | 0.746 | 0.024 | 7.004 |
| 29    | c                | 3.164                      | 0.022 | 2.617 | 0.125 | 0.101 | 0.234 | 0.703 | 0.008 | 6.973 |
| 29    | r                | 3.108                      | 0.024 | 2.721 | 0.094 | 0.065 | 0.278 | 0.672 | 0.014 | 6.981 |
| 30    | c                | 3.232                      | 0.022 | 2.476 | 0.149 | 0.153 | 0.191 | 0.747 | 0.008 | 6.978 |
| 30    | r                | 3.289                      | 0.018 | 2.380 | 0.146 | 0.181 | 0.152 | 0.787 | 0.010 | 6.971 |

<sup>1</sup> Core (c) or rim (r) of grains.
